# Supplementary material
Source: publisher figshare collection journal article supplement (https://gsajournals.figshare.com/articles/dataset/_/13017866)
Supplement: Supplementary file 1 [file 1]

## Sheet: SuppFile4
Table S10. Result from the annotation enrichment analysis with Blast2GO using 248 candidate genes as a test set and all the 34,698 genes in the annotation database of P. trichocarpa (v4.1) as a reference set. The annotations of all genes were extracted from the blast hits using Blast2GO.
Tags	Annotation	FDR	P-Value	Nr Test	Nr Reference	Non Annot Test	Non Annot Reference
[OVER]	probable disease resistance protein At4g27220	1.9912377710297296E-12	1.0520064301720888E-16	14	57	234	34393
[OVER]	disease resistance protein RPM1-like	9.209834197539543E-12	9.73143934651262E-16	9	8	239	34442
[OVER]	disease resistance RPP13-like protein 4	6.219967349551906E-6	9.858359070507036E-10	5	3	243	34447
[OVER]	cold-shock protein CS120 isoform X1	1.2054574677891288E-5	2.5474587231384803E-9	4	0	244	34450
[OVER]	disease resistance-like protein DSC1 isoform X1	4.794700649892925E-5	1.26656293583393E-8	4	1	244	34449
[OVER]	putative disease resistance protein RGA3	1.307266627182596E-4	4.14391365336833E-8	6	22	242	34428
[OVER]	18.1 kDa class I heat shock protein-like	0.05319604604841347	1.9673093952815633E-5	3	5	245	34445
[OVER]	myb-related protein 306	0.06420453922270661	5.0880604836253124E-5	2	0	246	34450
[OVER]	receptor-like protein kinase THESEUS 1	0.06420453922270661	5.0880604836253124E-5	2	0	246	34450
[OVER]	DEAD-box ATP-dependent RNA helicase 3, chloroplastic	0.06420453922270661	5.0880604836253124E-5	2	0	246	34450
[OVER]	photosystem II core complex proteins psbY, chloroplastic-like	0.06420453922270661	5.0880604836253124E-5	2	0	246	34450
[OVER]	glutamate--glyoxylate aminotransferase 2	0.06420453922270661	5.0880604836253124E-5	2	0	246	34450
[OVER]	putative disease resistance protein	0.06420453922270661	5.0880604836253124E-5	2	0	246	34450
[OVER]	alpha-glucan water dikinase, chloroplastic isoform X1	0.06420453922270661	5.0880604836253124E-5	2	0	246	34450
[OVER]	chlorophyll a-b binding protein CP24 10A, chloroplastic	0.06420453922270661	5.0880604836253124E-5	2	0	246	34450
[OVER]	histone deacetylase HDT1	0.15134461380389289	1.5192031182766086E-4	2	1	246	34449
[OVER]	TIR-NBS disease resistance-like protein	0.15134461380389289	1.5192031182766086E-4	2	1	246	34449
[OVER]	photosystem II protein D2 (chloroplast)	0.15134461380389289	1.5192031182766086E-4	2	1	246	34449
[OVER]	photosystem II 44 kDa protein (chloroplast)	0.15134461380389289	1.5192031182766086E-4	2	1	246	34449
[OVER]	NADH dehydrogenase subunit 2 (chloroplast)	0.2725679415824219	3.0240526063138524E-4	2	2	246	34448
[OVER]	adenylate isopentenyltransferase 5, chloroplastic-like	0.2725679415824219	3.0240526063138524E-4	2	2	246	34448
[OVER]	disease resistance-like protein DSC1	0.37527385984335226	4.361805217959504E-4	3	18	245	34432
[OVER]	somatic embryogenesis receptor kinase 2	0.41281899000179123	5.016291615617709E-4	2	3	246	34447
[OVER]	gibberellin 2-beta-dioxygenase 8-like	0.5906271233533089	7.488932248773993E-4	2	4	246	34446
[OVER]	putative disease resistance RPP13-like protein 1	0.783960585371786	0.0010354508999521688	3	25	245	34425
[OVER]	probable disease resistance protein At4g27220 isoform X1	0.841770987292273	0.001156278828698177	4	60	244	34390
[]	actin-66 isoform X1	1.0	0.999999999935218	0	1	248	34449
[]	histidine protein methyltransferase 1 homolog isoform X1	1.0	0.999999999935218	0	1	248	34449
[]	CDK5RAP3-like protein	1.0	0.999999999935218	0	1	248	34449
[]	Pathogenic type III effector avirulence factor Avr cleavage site	1.0	0.999999999935218	0	1	248	34449
[]	organ-specific protein S2-like	1.0	0.999999999935218	0	1	248	34449
[]	laccase-17-like	1.0	0.999999999935218	0	1	248	34449
[]	protein CbbY-like	1.0	0.999999999935218	0	1	248	34449
[]	hypothetical protein POPTR_011G056500	1.0	0.999999999935218	0	1	248	34449
[]	protein unc-50 homolog	1.0	0.999999999895225	0	2	248	34448
[]	E3 ubiquitin-protein ligase RGLG4 isoform X2	1.0	0.999999999935218	0	1	248	34449
[]	protein transport protein Sec24-like At4g32640	1.0	0.999999999895225	0	2	248	34448
[]	Lactoylglutathione lyase/glyoxalase I family protein	1.0	0.999999999935218	0	1	248	34449
[]	uncharacterized protein LOC7481830	1.0	0.999999999935218	0	1	248	34449
[]	hypothetical protein POPTR_001G386950	1.0	0.999999999935218	0	1	248	34449
[]	lysM domain receptor-like kinase 4	1.0	0.9999999999108056	0	7	248	34443
[]	lysM domain receptor-like kinase 3	1.0	0.9999999999621275	0	11	248	34439
[]	WAT1-related protein At4g30420	1.0	1.0000000000094642	0	3	248	34447
[]	uncharacterized protein LOC7479516	1.0	0.999999999935218	0	1	248	34449
[]	nucleolar protein 10	1.0	0.999999999935218	0	1	248	34449
[]	mitochondrial Rho GTPase 2 isoform X1	1.0	0.999999999935218	0	1	248	34449
[]	nuclear polyadenylated RNA-binding protein	1.0	0.999999999935218	0	1	248	34449
[]	ras-related protein RABB1c	1.0	0.999999999935218	0	1	248	34449
[]	protein MEN-8	1.0	0.999999999895225	0	2	248	34448
[]	isopentenyl-diphosphate Delta-isomerase I	1.0	0.999999999935218	0	1	248	34449
[]	protein SPA, chloroplastic	1.0	0.999999999895225	0	2	248	34448
[]	ras-related protein RABB1b	1.0	0.999999999935218	0	1	248	34449
[]	nucleolar protein 16	1.0	0.999999999935218	0	1	248	34449
[]	hypothetical protein POPTR_003G024501	1.0	0.999999999895225	0	2	248	34448
[]	licodione synthase	1.0	0.999999999935218	0	1	248	34449
[]	small acidic protein 1	1.0	0.999999999895225	0	2	248	34448
[]	coiled-coil domain-containing protein 124	1.0	0.999999999935218	0	1	248	34449
[]	endonuclease, putative	1.0	0.999999999895225	0	2	248	34448
[]	hypothetical protein POPTR_019G012700	1.0	0.999999999935218	0	1	248	34449
[]	cytochrome P450 83B1	1.0	0.9999999999930864	0	6	248	34444
[]	putative lipase YDR444W	1.0	0.999999999935218	0	1	248	34449
[]	UPF0047 protein C4A8.02c-like	1.0	0.999999999935218	0	1	248	34449
[]	putative E3 ubiquitin-protein ligase RING1a isoform X1	1.0	0.999999999935218	0	1	248	34449
[]	uncharacterized protein LOC18096960 isoform X1	1.0	0.999999999935218	0	1	248	34449
[]	protein NUCLEAR FUSION DEFECTIVE 2	1.0	0.999999999895225	0	2	248	34448
[]	auxin response factor 19-like	1.0	0.999999999935218	0	1	248	34449
[]	protein NUCLEAR FUSION DEFECTIVE 4	1.0	1.0000000000267937	0	12	248	34438
[]	probable RNA-binding protein ARP1 isoform X2	1.0	0.999999999935218	0	1	248	34449
[]	transcription factor Pur-alpha 1-like isoform X1	1.0	0.999999999935218	0	1	248	34449
[]	uncharacterized protein LOC7479506	1.0	0.999999999935218	0	1	248	34449
[]	switch-associated protein 70 isoform X1	1.0	0.999999999895225	0	2	248	34448
[]	probable RNA-binding protein ARP1 isoform X1	1.0	0.999999999935218	0	1	248	34449
[]	dehydration-responsive element-binding protein 2F	1.0	0.999999999895225	0	2	248	34448
[]	hsp70 nucleotide exchange factor FES1	1.0	0.999999999895225	0	2	248	34448
[]	UPF0261 protein mll9388	1.0	0.999999999935218	0	1	248	34449
[]	dual specificity protein phosphatase 2-like	1.0	0.999999999935218	0	1	248	34449
[]	cytosolic enolase 3	1.0	0.999999999935218	0	1	248	34449
[]	protein DSS1 HOMOLOG ON CHROMOSOME V-like	1.0	0.999999999935218	0	1	248	34449
[]	F-box protein At1g22220	1.0	0.999999999895225	0	2	248	34448
[]	transcriptional adapter ADA2a isoform X1	1.0	0.999999999935218	0	1	248	34449
[]	hypothetical protein POPTR_017G069000	1.0	0.999999999935218	0	1	248	34449
[]	uncharacterized protein LOC7479534	1.0	0.999999999935218	0	1	248	34449
[]	uncharacterized protein LOC7479533	1.0	0.999999999935218	0	1	248	34449
[]	hypothetical protein POPTR_008G018000	1.0	0.999999999935218	0	1	248	34449
[]	uncharacterized protein LOC7454238	1.0	0.999999999935218	0	1	248	34449
[]	cell division control protein 2 homolog	1.0	0.999999999935218	0	1	248	34449
[]	coiled-coil domain-containing protein 130-like	1.0	0.999999999895225	0	2	248	34448
[]	callose synthase 3	1.0	0.999999999895225	0	2	248	34448
[]	callose synthase 9	1.0	0.999999999935218	0	1	248	34449
[]	uncharacterized protein LOC7468104 isoform X2	1.0	0.999999999935218	0	1	248	34449
[]	hypothetical protein POPTR_018G088050	1.0	0.999999999935218	0	1	248	34449
[]	hypothetical protein POPTR_004G068800	1.0	0.999999999935218	0	1	248	34449
[]	o-linked n-acetylglucosamine transferase, ogt, putative	1.0	0.999999999895225	0	2	248	34448
[]	callose synthase 5	1.0	0.999999999935218	0	1	248	34449
[]	uncharacterized protein LOC7481836	1.0	0.999999999935218	0	1	248	34449
[]	callose synthase 7	1.0	0.999999999895225	0	2	248	34448
[]	uncharacterized protein LOC7479523	1.0	0.999999999935218	0	1	248	34449
[]	protein LURP-one-related 4-like	1.0	0.999999999935218	0	1	248	34449
[]	probable galacturonosyltransferase 6 isoform X2	1.0	0.999999999935218	0	1	248	34449
[]	ATP synthase subunit c, chloroplastic	1.0	0.999999999935218	0	1	248	34449
[]	putative pentatricopeptide repeat-containing protein At5g59200, chloroplastic	1.0	0.999999999935218	0	1	248	34449
[]	uncharacterized protein LOC7496009 isoform X1	1.0	0.999999999935218	0	1	248	34449
[]	protein MEMO1	1.0	0.999999999895225	0	2	248	34448
[]	uncharacterized protein LOC7479527	1.0	0.999999999935218	0	1	248	34449
[]	jmjC domain-containing protein C-like isoform X2	1.0	0.999999999935218	0	1	248	34449
[]	jmjC domain-containing protein C-like isoform X1	1.0	0.999999999935218	0	1	248	34449
[]	transcription factor PCL1-like	1.0	0.999999999935218	0	1	248	34449
[]	ABC transporter F family member 1	1.0	0.999999999895225	0	2	248	34448
[]	cycloartenol-C-24-methyltransferase	1.0	0.999999999895225	0	2	248	34448
[]	ABC transporter F family member 3	1.0	0.999999999935218	0	1	248	34449
[]	pentatricopeptide repeat-containing protein At5g24830	1.0	0.999999999935218	0	1	248	34449
[]	uncharacterized protein LOC7468819	1.0	0.999999999935218	0	1	248	34449
[]	histidine-containing phosphotransfer protein 5	1.0	0.999999999935218	0	1	248	34449
[]	plant UBX domain-containing protein 9 isoform X2	1.0	0.999999999935218	0	1	248	34449
[OVER]	histidine-containing phosphotransfer protein 4	1.0	0.014243891427497189	1	1	247	34449
[]	ABC transporter F family member 4	1.0	1.00000000005054	0	4	248	34446
[OVER]	histidine-containing phosphotransfer protein 1	1.0	0.014243891427497189	1	1	247	34449
[]	deoxyhypusine synthase	1.0	0.999999999935218	0	1	248	34449
[]	BAG-associated GRAM protein 1 isoform X1	1.0	0.999999999935218	0	1	248	34449
[]	ABC transporter F family member 5	1.0	0.999999999895225	0	2	248	34448
[]	arogenate dehydratase/prephenate dehydratase 2, chloroplastic	1.0	0.999999999935218	0	1	248	34449
[OVER]	TPR repeat-containing thioredoxin TDX	1.0	0.014243891427497189	1	1	247	34449
[]	arabinogalactan peptide 20-like	1.0	0.999999999935218	0	1	248	34449
[]	succinate dehydrogenase subunit 4 (mitochondrion)	1.0	0.999999999935218	0	1	248	34449
[]	thioredoxin-like protein AAED1, chloroplastic	1.0	1.0000000000094642	0	3	248	34447
[]	alkaline/neutral invertase E, chloroplastic-like	1.0	0.999999999935218	0	1	248	34449
[]	uncharacterized protein LOC7455508	1.0	0.999999999935218	0	1	248	34449
[]	protein CHUP1, chloroplastic-like	1.0	0.999999999895225	0	2	248	34448
[]	prolyl endopeptidase-like	1.0	0.9999999999930864	0	6	248	34444
[]	far upstream element-binding protein 1-like	1.0	0.999999999895225	0	2	248	34448
[]	hypothetical protein POPTR_002G260800	1.0	0.999999999935218	0	1	248	34449
[]	UDP-glycosyltransferase 73B4-like	1.0	1.0000000000094642	0	3	248	34447
[]	triacylglycerol lipase	1.0	0.999999999935218	0	1	248	34449
[]	protein NETWORKED 3C	1.0	0.999999999895225	0	2	248	34448
[]	microtubule-associated family protein	1.0	0.999999999895225	0	2	248	34448
[]	ubiquitin-like modifier-activating enzyme atg7	1.0	0.999999999895225	0	2	248	34448
[]	Development and Cell Death domain protein	1.0	0.999999999935218	0	1	248	34449
[]	filament-like plant protein	1.0	0.999999999895225	0	2	248	34448
[OVER]	calmodulin-binding heat-shock protein CaMBP	1.0	0.007147386016652852	1	0	247	34450
[]	cycloeucalenol cycloisomerase	1.0	0.999999999935218	0	1	248	34449
[]	cysteine proteinase inhibitor-like	1.0	0.999999999895225	0	2	248	34448
[]	hypothetical protein POPTR_003G011200	1.0	0.999999999935218	0	1	248	34449
[]	uncharacterized protein LOC7456842	1.0	0.999999999895225	0	2	248	34448
[]	hypothetical protein POPTR_002G211800	1.0	0.999999999935218	0	1	248	34449
[]	high affinity nitrate transporter 2.5-like	1.0	0.999999999895225	0	2	248	34448
[]	uncharacterized protein LOC7456840	1.0	0.999999999935218	0	1	248	34449
[]	upstream activation factor subunit UAF30 isoform X2	1.0	0.999999999935218	0	1	248	34449
[]	protein NETWORKED 4A	1.0	0.999999999935218	0	1	248	34449
[]	glutamate receptor 2.8-like	1.0	1.0000000000094642	0	3	248	34447
[]	putative serine/threonine-protein kinase cdc7 isoform X4	1.0	0.999999999895225	0	2	248	34448
[]	hypothetical protein POPTR_002G006800	1.0	0.999999999935218	0	1	248	34449
[]	protein NETWORKED 2D	1.0	0.999999999895225	0	2	248	34448
[]	ubinuclein-1 isoform X1	1.0	1.0000000000094642	0	3	248	34447
[]	putative tocopherol cyclase	1.0	0.999999999935218	0	1	248	34449
[]	4-hydroxy-3-methylbut-2-en-1-yl diphosphate synthase (ferredoxin), chloroplastic	1.0	0.999999999895225	0	2	248	34448
[]	uncharacterized protein LOC7481808	1.0	0.999999999935218	0	1	248	34449
[]	protein SENSITIVE TO PROTON RHIZOTOXICITY 1-like	1.0	0.999999999935218	0	1	248	34449
[OVER]	shaggy-related protein kinase eta	1.0	0.014243891427497189	1	1	247	34449
[]	BURP domain protein USPL1	1.0	0.999999999895225	0	2	248	34448
[]	coiled-coil domain-containing protein 115	1.0	0.999999999935218	0	1	248	34449
[]	protein CHROMATIN REMODELING 24 isoform X1	1.0	0.999999999935218	0	1	248	34449
[]	uncharacterized protein LOC7455520	1.0	0.999999999935218	0	1	248	34449
[]	30S ribosomal protein 3, chloroplastic-like	1.0	0.999999999935218	0	1	248	34449
[]	uncharacterized protein LOC18108787 isoform X1	1.0	0.999999999935218	0	1	248	34449
[]	ruvB-like 2	1.0	0.999999999895225	0	2	248	34448
[]	hydroxyphenylpyruvate reductase-like	1.0	0.999999999895225	0	2	248	34448
[]	AP-5 complex subunit beta-1	1.0	0.999999999935218	0	1	248	34449
[]	EMBRYO DEFECTIVE 3147	1.0	0.999999999935218	0	1	248	34449
[]	protein NETWORKED 1A	1.0	0.999999999935218	0	1	248	34449
[]	protein NETWORKED 1D	1.0	0.999999999895225	0	2	248	34448
[]	protein LIKE COV 2	1.0	0.999999999895225	0	2	248	34448
[]	uncharacterized protein LOC7468840	1.0	0.999999999935218	0	1	248	34449
[]	uncharacterized protein LOC7468841	1.0	0.999999999935218	0	1	248	34449
[]	protein LIKE COV 3	1.0	0.999999999935218	0	1	248	34449
[]	cyclin-D3-1	1.0	0.999999999935218	0	1	248	34449
[]	copper transporter 1-like	1.0	1.0000000000094642	0	3	248	34447
[]	pistil-specific extensin-like protein	1.0	0.999999999895225	0	2	248	34448
[]	stress-response A/B barrel domain-containing protein HS1	1.0	0.99999999992532	0	5	248	34445
[]	S-type anion channel SLAH2 isoform X3	1.0	0.999999999895225	0	2	248	34448
[]	uncharacterized protein LOC7467515	1.0	0.999999999935218	0	1	248	34449
[]	CLIP-associated protein isoform X1	1.0	0.999999999935218	0	1	248	34449
[]	signal peptide peptidase-like 3 isoform X1	1.0	0.999999999935218	0	1	248	34449
[]	signal peptide peptidase-like 3 isoform X2	1.0	0.999999999935218	0	1	248	34449
[]	histone-lysine N-methyltransferase ASHR2	1.0	0.999999999935218	0	1	248	34449
[]	protein ULTRAPETALA 1-like	1.0	0.999999999895225	0	2	248	34448
[]	hypothetical protein POPTR_009G109200	1.0	0.999999999935218	0	1	248	34449
[]	cellular nucleic acid-binding protein homolog isoform X1	1.0	0.999999999935218	0	1	248	34449
[]	probable L-type lectin-domain containing receptor kinase S.7	1.0	0.999999999895225	0	2	248	34448
[]	probable L-type lectin-domain containing receptor kinase S.5	1.0	0.9999999999930864	0	6	248	34444
[]	transcription factor FER-LIKE IRON DEFICIENCY-INDUCED TRANSCRIPTION FACTOR	1.0	0.999999999935218	0	1	248	34449
[]	thiamine pyrophosphokinase 1-like isoform X1	1.0	0.999999999935218	0	1	248	34449
[]	hypothetical protein POPTR_006G225900	1.0	0.999999999935218	0	1	248	34449
[]	probable peroxygenase 4	1.0	0.999999999895225	0	2	248	34448
[]	Abhydrolase_6 domain-containing protein	1.0	0.999999999935218	0	1	248	34449
[]	protein NETWORKED 2A	1.0	0.999999999935218	0	1	248	34449
[]	hypothetical protein POPTR_009G016950	1.0	0.999999999935218	0	1	248	34449
[]	GIY-YIG domain-containing protein	1.0	0.999999999935218	0	1	248	34449
[]	uncharacterized proline-rich protein	1.0	0.999999999935218	0	1	248	34449
[]	mitogen-activated protein kinase kinase kinase 5 isoform X2	1.0	0.999999999895225	0	2	248	34448
[]	linoleate 13S-lipoxygenase 3-1, chloroplastic-like	1.0	0.999999999895225	0	2	248	34448
[]	putative nuclear RNA export factor SDE5	1.0	0.999999999935218	0	1	248	34449
[]	small nuclear ribonucleoprotein E-like	1.0	0.999999999895225	0	2	248	34448
[]	small heat-shock protein, putative	1.0	0.999999999935218	0	1	248	34449
[]	beta-fructofuranosidase, insoluble isoenzyme CWINV1-like	1.0	0.999999999935218	0	1	248	34449
[]	AP-5 complex subunit mu	1.0	0.999999999935218	0	1	248	34449
[]	protein FIZZY-RELATED 2-like	1.0	0.999999999895225	0	2	248	34448
[]	alanine--glyoxylate aminotransferase 2 homolog 3, mitochondrial-like	1.0	0.999999999895225	0	2	248	34448
[]	uncharacterized protein LOC18093966 isoform X2	1.0	0.999999999935218	0	1	248	34449
[]	ethylene-overproduction protein 1	1.0	1.0000000000094642	0	3	248	34447
[]	aldehyde dehydrogenase family 3 member H1 isoform X1	1.0	0.999999999935218	0	1	248	34449
[]	28S ribosomal protein S9, mitochondrial	1.0	0.999999999935218	0	1	248	34449
[]	pentatricopeptide repeat-containing protein At2g26790, mitochondrial-like	1.0	0.999999999935218	0	1	248	34449
[]	receptor-like protein kinase HAIKU2	1.0	0.999999999895225	0	2	248	34448
[]	autophagy-related protein 13b-like	1.0	0.999999999895225	0	2	248	34448
[]	uncharacterized protein LOC18106816 isoform X1	1.0	0.999999999935218	0	1	248	34449
[]	dihydroxy-acid dehydratase, chloroplastic	1.0	0.999999999895225	0	2	248	34448
[]	structural maintenance of chromosomes protein 4	1.0	0.999999999935218	0	1	248	34449
[]	peroxisome biogenesis factor 10	1.0	0.999999999935218	0	1	248	34449
[]	structural maintenance of chromosomes protein 3	1.0	0.999999999935218	0	1	248	34449
[]	peroxidase P7-like	1.0	1.0000000000094642	0	3	248	34447
[]	TITAN-like protein isoform X1	1.0	0.999999999895225	0	2	248	34448
[]	thiamine thiazole synthase 2, chloroplastic	1.0	0.999999999895225	0	2	248	34448
[]	probable beta-1,3-galactosyltransferase 8	1.0	0.999999999935218	0	1	248	34449
[]	ABC transporter G family member 25-like	1.0	0.999999999895225	0	2	248	34448
[]	uncharacterized protein LOC7479892 isoform X1	1.0	0.999999999935218	0	1	248	34449
[]	structural maintenance of chromosomes protein 1	1.0	0.999999999935218	0	1	248	34449
[]	ribonuclease P protein subunit p25-like protein	1.0	0.999999999895225	0	2	248	34448
[]	uncharacterized protein At4g22758	1.0	1.00000000005054	0	4	248	34446
[]	plant cysteine oxidase 4-like isoform X1	1.0	0.999999999895225	0	2	248	34448
[]	polyadenylate-binding protein-interacting protein 7	1.0	0.999999999895225	0	2	248	34448
[]	calponin-likey domain-containing protein	1.0	0.999999999895225	0	2	248	34448
[]	protein ANTHESIS POMOTING FACTOR 1	1.0	0.999999999935218	0	1	248	34449
[]	uncharacterized protein LOC7480173 isoform X3	1.0	0.999999999935218	0	1	248	34449
[]	probable disease resistance protein At5g66900	1.0	1.0000000000368094	0	8	248	34442
[]	oligopeptide transporter 7	1.0	0.999999999895225	0	2	248	34448
[]	hypothetical protein POPTR_004G234200	1.0	0.999999999935218	0	1	248	34449
[]	ethylene-responsive transcription factor RAP2-11	1.0	1.0000000000094642	0	3	248	34447
[]	oligopeptide transporter 4	1.0	0.999999999935218	0	1	248	34449
[]	oligopeptide transporter 3	1.0	0.999999999895225	0	2	248	34448
[]	Ribosomal protein	1.0	0.99999999992532	0	5	248	34445
[]	oligopeptide transporter 2	1.0	0.999999999935218	0	1	248	34449
[]	oligopeptide transporter 1	1.0	0.999999999895225	0	2	248	34448
[]	rab escort protein 1 isoform X2	1.0	0.999999999935218	0	1	248	34449
[]	Kunitz trypsin inhibitor	1.0	0.999999999935218	0	1	248	34449
[]	WD repeat-containing protein 3	1.0	0.999999999935218	0	1	248	34449
[]	myb-related protein 315	1.0	0.999999999895225	0	2	248	34448
[]	probable glucan 1,3-beta-glucosidase A isoform X1	1.0	0.999999999935218	0	1	248	34449
[]	histone acetyltransferase of the MYST family 1	1.0	0.999999999935218	0	1	248	34449
[]	hypothetical protein D5086_0000138240	1.0	0.999999999935218	0	1	248	34449
[]	PREDICTED: uncharacterized protein LOC105121533	1.0	0.999999999935218	0	1	248	34449
[]	protein IN CHLOROPLAST ATPASE BIOGENESIS, chloroplastic-like	1.0	0.999999999935218	0	1	248	34449
[]	ethylene-responsive transcription factor 13-like	1.0	1.00000000005054	0	4	248	34446
[]	LMBR1-like membrane protein isoform 1	1.0	0.999999999935218	0	1	248	34449
[]	GDSL esterase/lipase EXL3-like	1.0	0.999999999895225	0	2	248	34448
[]	late embryogenesis abundant protein At1g64065-like	1.0	0.99999999992532	0	5	248	34445
[]	cell division control protein 6 homolog B	1.0	0.999999999935218	0	1	248	34449
[OVER]	photosystem II protein D1 (chloroplast)	1.0	0.014243891427497189	1	1	247	34449
[]	protein NRT1/ PTR FAMILY 2.7-like isoform X1	1.0	0.999999999935218	0	1	248	34449
[]	hypothetical protein POPTR_008G224300	1.0	0.99999999992532	0	5	248	34445
[]	hypothetical protein Csa_000564	1.0	0.999999999935218	0	1	248	34449
[]	receptor-like serine/threonine-protein kinase NCRK isoform X1	1.0	0.999999999895225	0	2	248	34448
[]	uncharacterized protein LOC7467847 isoform X2	1.0	0.999999999935218	0	1	248	34449
[]	protein N-methyltransferase NNT1 isoform X3	1.0	0.999999999935218	0	1	248	34449
[]	protein FATTY ACID EXPORT 3, chloroplastic isoform X1	1.0	0.999999999935218	0	1	248	34449
[]	pelargonidin 3-O-(6-caffeoylglucoside) 5-O-(6-O-malonylglucoside) 4'''-malonyltransferase	1.0	0.999999999895225	0	2	248	34448
[]	protein HAPLESS 2	1.0	0.999999999935218	0	1	248	34449
[]	Sphingomyelin synthase-like domain containing protein	1.0	0.999999999935218	0	1	248	34449
[]	hypothetical protein D5086_0000319630	1.0	0.999999999935218	0	1	248	34449
[]	cyclin-D1-1-like isoform X2	1.0	1.0000000000094642	0	3	248	34447
[]	UDP-N-acetylglucosamine--dolichyl-phosphate N-acetylglucosaminephosphotransferase	1.0	0.999999999895225	0	2	248	34448
[]	probable protein phosphatase 2C 76 isoform X1	1.0	0.999999999895225	0	2	248	34448
[]	presequence protease 1, chloroplastic/mitochondrial	1.0	0.999999999895225	0	2	248	34448
[]	tRNA modification GTPase MnmE	1.0	0.999999999935218	0	1	248	34449
[]	probable inactive ATP-dependent zinc metalloprotease FTSHI 1, chloroplastic	1.0	0.999999999935218	0	1	248	34449
[]	protein TORNADO 1	1.0	0.999999999935218	0	1	248	34449
[]	protein TORNADO 2	1.0	0.999999999895225	0	2	248	34448
[]	rRNA-processing protein FCF1 homolog	1.0	0.999999999895225	0	2	248	34448
[]	golgin subfamily A member 6-like protein 1	1.0	0.999999999895225	0	2	248	34448
[]	DExH-box ATP-dependent RNA helicase DExH1 isoform X1	1.0	0.999999999935218	0	1	248	34449
[]	protein Dr1 homolog isoform X1	1.0	0.999999999895225	0	2	248	34448
[]	mitochondrial import inner membrane translocase subunit TIM10-like	1.0	0.999999999895225	0	2	248	34448
[]	transcription factor MYB102-like	1.0	0.99999999992532	0	5	248	34445
[]	uncharacterized protein LOC7493474 isoform X1	1.0	0.999999999935218	0	1	248	34449
[]	60S ribosomal protein L27-3-like	1.0	0.999999999935218	0	1	248	34449
[]	ATP binding protein, putative	1.0	0.9999999999403628	0	20	248	34430
[]	isoamylase 1, chloroplastic-like	1.0	0.999999999935218	0	1	248	34449
[]	mitotic spindle checkpoint protein BUBR1	1.0	0.999999999895225	0	2	248	34448
[]	pentatricopeptide repeat-containing protein At4g30825, chloroplastic	1.0	0.999999999935218	0	1	248	34449
[]	presenilin-like protein At1g08700 isoform X1	1.0	0.999999999935218	0	1	248	34449
[]	lycopene epsilon cyclase, chloroplastic	1.0	0.999999999935218	0	1	248	34449
[]	hypothetical protein POPTR_011G069800	1.0	0.999999999935218	0	1	248	34449
[]	cinnamoyl-CoA reductase 2-like isoform X2	1.0	0.999999999895225	0	2	248	34448
[]	NAC domain-containing protein 45-like isoform X2	1.0	0.999999999935218	0	1	248	34449
[]	Tyrosine-protein kinase-like	1.0	0.999999999935218	0	1	248	34449
[]	transcription factor IBH1-like 1	1.0	0.999999999895225	0	2	248	34448
[]	NAC domain-containing protein 45-like isoform X1	1.0	0.999999999895225	0	2	248	34448
[]	E3 ubiquitin-protein ligase RNF170-like isoform X1	1.0	0.999999999895225	0	2	248	34448
[]	bifunctional D-cysteine desulfhydrase/1-aminocyclopropane-1-carboxylate deaminase, mitochondrial	1.0	0.999999999935218	0	1	248	34449
[]	probable ethanolamine kinase isoform X1	1.0	0.999999999935218	0	1	248	34449
[]	signaling peptide TAXIMIN 1-like	1.0	0.999999999935218	0	1	248	34449
[]	putative defensin-like protein 244	1.0	0.999999999895225	0	2	248	34448
[]	FYVE domain-containing protein/DUF500 domain-containing protein	1.0	0.999999999935218	0	1	248	34449
[]	protein phosphatase inhibitor 2	1.0	0.999999999895225	0	2	248	34448
[]	beta-galactosidase 8-like	1.0	0.999999999935218	0	1	248	34449
[]	phytolongin Phyl1.1	1.0	0.999999999895225	0	2	248	34448
[]	basic leucine zipper 19-like	1.0	0.999999999935218	0	1	248	34449
[]	Zinc finger and BTB domain-containing protein 11 isoform 1	1.0	0.999999999935218	0	1	248	34449
[]	60S acidic ribosomal protein P3-like	1.0	0.999999999895225	0	2	248	34448
[]	myosin-binding protein 7 isoform X2	1.0	0.999999999895225	0	2	248	34448
[]	pentatricopeptide repeat-containing protein At1g20230	1.0	0.999999999935218	0	1	248	34449
[]	2-like isoform X2	1.0	0.999999999895225	0	2	248	34448
[]	PREDICTED: uncharacterized protein LOC105122890	1.0	1.0000000000094642	0	3	248	34447
[]	2-like isoform X1	1.0	1.00000000005054	0	4	248	34446
[]	hypothetical protein POPTR_012G075550	1.0	0.999999999935218	0	1	248	34449
[]	protein SUPPRESSOR OF GENE SILENCING 3	1.0	0.9999999999930864	0	6	248	34444
[]	probable inactive receptor-like protein kinase At3g56050	1.0	0.999999999935218	0	1	248	34449
[]	integrin-linked protein kinase 1 isoform X1	1.0	0.999999999935218	0	1	248	34449
[]	Polyketide cyclase/dehydrase and lipid transport superfamily protein	1.0	0.999999999895225	0	2	248	34448
[]	mediator of RNA polymerase II transcription subunit 37a-like	1.0	0.999999999935218	0	1	248	34449
[]	acyl carrier protein 4, chloroplastic-like	1.0	0.999999999895225	0	2	248	34448
[]	heavy metal-associated isoprenylated plant protein 37-like	1.0	0.999999999895225	0	2	248	34448
[]	hypothetical protein POPTR_014G003300, partial	1.0	0.999999999935218	0	1	248	34449
[]	high mobility group B protein 9	1.0	0.999999999935218	0	1	248	34449
[]	INO80 complex subunit D-like	1.0	1.0000000000094642	0	3	248	34447
[]	hypothetical protein POPTR_001G443150	1.0	0.999999999935218	0	1	248	34449
[]	dehydration responsive element binding protein	1.0	0.999999999935218	0	1	248	34449
[]	high mobility group B protein 7	1.0	0.999999999895225	0	2	248	34448
[]	high mobility group B protein 6	1.0	0.999999999935218	0	1	248	34449
[]	nucleoid DNA-binding family protein	1.0	1.0000000000094642	0	3	248	34447
[]	putative metallophosphoesterase At3g03305	1.0	0.999999999895225	0	2	248	34448
[]	putative cytochrome c oxidase subunit 5b-like	1.0	0.999999999895225	0	2	248	34448
[]	LOB domain-containing protein 33-like	1.0	0.999999999935218	0	1	248	34449
[]	beta-amyrin synthase	1.0	0.99999999992532	0	5	248	34445
[]	hypothetical protein POPTR_006G019550	1.0	0.999999999935218	0	1	248	34449
[]	hypothetical protein POPTR_006G018200	1.0	0.999999999935218	0	1	248	34449
[]	calcium-dependent protein kinase 32-like	1.0	0.999999999895225	0	2	248	34448
[]	probable aminotransferase ACS12	1.0	0.999999999935218	0	1	248	34449
[]	uncharacterized membrane protein At3g27390-like	1.0	0.999999999935218	0	1	248	34449
[]	pentatricopeptide repeat-containing protein At1g09820	1.0	0.999999999935218	0	1	248	34449
[]	hypothetical protein POPTR_018G102900	1.0	0.999999999935218	0	1	248	34449
[]	probable aminotransferase ACS10	1.0	0.999999999935218	0	1	248	34449
[]	origin of replication complex subunit 5	1.0	0.999999999895225	0	2	248	34448
[]	origin of replication complex subunit 6	1.0	0.999999999935218	0	1	248	34449
[]	hypothetical protein POPTR_001G009200	1.0	0.999999999935218	0	1	248	34449
[]	high mobility group B protein 1	1.0	0.999999999895225	0	2	248	34448
[]	DELLA protein GAIP-B	1.0	1.0000000000094642	0	3	248	34447
[]	origin of replication complex subunit 4	1.0	0.999999999935218	0	1	248	34449
[]	phosphatidylinositol/phosphatidylcholine transfer protein SFH12 isoform X1	1.0	0.999999999895225	0	2	248	34448
[]	uncharacterized protein LOC7497591 isoform X1	1.0	0.999999999935218	0	1	248	34449
[]	origin of replication complex subunit 2	1.0	0.999999999935218	0	1	248	34449
[]	putative pentatricopeptide repeat-containing protein At1g26500	1.0	0.999999999935218	0	1	248	34449
[]	EVI5-like protein	1.0	0.999999999935218	0	1	248	34449
[]	hypothetical protein POPTR_018G053400	1.0	0.999999999935218	0	1	248	34449
[]	integrin-linked protein kinase 1 isoform X2	1.0	0.999999999895225	0	2	248	34448
[]	malonate--CoA ligase	1.0	0.999999999935218	0	1	248	34449
[]	phospholipase D delta-like	1.0	0.999999999895225	0	2	248	34448
[]	thiamine pyrophosphokinase 1 isoform X1	1.0	0.999999999935218	0	1	248	34449
[]	homeobox protein 4	1.0	0.999999999935218	0	1	248	34449
[]	cytochrome P450 94A1-like	1.0	0.99999999992532	0	5	248	34445
[]	UDP-glycosyltransferase 73C1-like	1.0	0.999999999935218	0	1	248	34449
[]	Regulatory protein	1.0	0.999999999935218	0	1	248	34449
[]	homeobox protein 9	1.0	0.999999999935218	0	1	248	34449
[]	uncharacterized protein LOC7453923 isoform X1	1.0	0.999999999935218	0	1	248	34449
[]	meiotic recombination protein SPO11-2 isoform X1	1.0	0.999999999935218	0	1	248	34449
[]	transcription factor bHLH74-like isoform X1	1.0	0.999999999895225	0	2	248	34448
[]	thiamine thiazole synthase, chloroplastic	1.0	0.999999999935218	0	1	248	34449
[]	extra-large guanine nucleotide-binding protein 1 isoform X1	1.0	0.999999999935218	0	1	248	34449
[]	serine/threonine-protein phosphatase 2A activator	1.0	0.999999999935218	0	1	248	34449
[]	equilibrative nucleotide transporter 3-like	1.0	1.00000000005054	0	4	248	34446
[]	hypothetical protein POPTR_003G119400	1.0	0.999999999935218	0	1	248	34449
[]	ABC transporter C family member 8 isoform X1	1.0	0.999999999935218	0	1	248	34449
[]	DNA replication complex GINS protein PSF3-like	1.0	0.999999999895225	0	2	248	34448
[]	serine/threonine-protein kinase PBL27	1.0	0.999999999895225	0	2	248	34448
[]	protein DMP2-like	1.0	0.999999999935218	0	1	248	34449
[]	zinc finger with UFM1-specific peptidase domain protein isoform X1	1.0	0.999999999935218	0	1	248	34449
[]	glutamyl-tRNA reductase-binding protein, chloroplastic isoform X1	1.0	0.999999999935218	0	1	248	34449
[]	branched-chain-amino-acid aminotransferase 2, chloroplastic-like isoform X1	1.0	0.999999999935218	0	1	248	34449
[]	uncharacterized oxidoreductase At1g06690, chloroplastic	1.0	1.0000000000094642	0	3	248	34447
[]	shewanella-like protein phosphatase 1	1.0	0.999999999935218	0	1	248	34449
[]	ribonuclease J isoform X1	1.0	0.999999999895225	0	2	248	34448
[]	WD repeat-containing protein 20-like	1.0	0.999999999935218	0	1	248	34449
[]	shewanella-like protein phosphatase 2	1.0	0.999999999935218	0	1	248	34449
[]	gibberellin 3-beta-dioxygenase 1-like	1.0	1.0000000000094642	0	3	248	34447
[]	protein NEN1-like	1.0	0.999999999935218	0	1	248	34449
[]	dystrophia myotonica WD repeat-containing protein	1.0	0.999999999935218	0	1	248	34449
[]	histone deacetylase 19	1.0	0.999999999895225	0	2	248	34448
[]	PHD finger protein MALE STERILITY 1	1.0	0.999999999935218	0	1	248	34449
[]	NADH-ubiquinone oxidoreductase chain	1.0	0.999999999895225	0	2	248	34448
[]	thioredoxin-like 1-1, chloroplastic	1.0	0.999999999895225	0	2	248	34448
[]	telomere repeat-binding protein 5 isoform X2	1.0	0.999999999935218	0	1	248	34449
[]	hypothetical protein POPTR_T179201	1.0	0.999999999935218	0	1	248	34449
[]	hypothetical protein POPTR_017G022400	1.0	0.999999999935218	0	1	248	34449
[]	Dimethylaniline monooxygenase [N-oxide-forming] 1	1.0	0.999999999935218	0	1	248	34449
[]	probable mitochondrial adenine nucleotide transporter BTL1 isoform X1	1.0	0.999999999935218	0	1	248	34449
[]	arabinogalactan peptide 13-like	1.0	0.999999999935218	0	1	248	34449
[]	glycine-rich cell wall structural protein 2-like	1.0	1.0000000000094642	0	3	248	34447
[]	SUPPRESSOR OF GAMMA RESPONSE 1 isoform X2	1.0	0.999999999935218	0	1	248	34449
[]	uncharacterized protein LOC7491276	1.0	0.999999999935218	0	1	248	34449
[]	hypothetical protein POPTR_001G214100	1.0	0.999999999935218	0	1	248	34449
[]	KH domain-containing protein At4g18375 isoform X1	1.0	0.999999999895225	0	2	248	34448
[]	exopolygalacturonase-like	1.0	0.99999999992532	0	5	248	34445
[]	carboxyl-terminal-processing peptidase 1, chloroplastic isoform X1	1.0	0.999999999935218	0	1	248	34449
[]	uncharacterized protein LOC18098263	1.0	0.999999999935218	0	1	248	34449
[]	cyclic phosphodiesterase	1.0	0.999999999935218	0	1	248	34449
[]	uncharacterized protein LOC18108203	1.0	0.999999999935218	0	1	248	34449
[]	uncharacterized protein LOC18108204	1.0	0.999999999935218	0	1	248	34449
[]	uncharacterized protein LOC18108202	1.0	0.999999999935218	0	1	248	34449
[]	hypothetical protein POPTR_T144550	1.0	0.999999999935218	0	1	248	34449
[]	kinesin-like protein KIN-4A isoform X1	1.0	1.0000000000094642	0	3	248	34447
[]	probable alpha-amylase 2	1.0	0.999999999935218	0	1	248	34449
[]	uncharacterized protein LOC18108207	1.0	0.999999999895225	0	2	248	34448
[]	uncharacterized protein LOC18108208	1.0	0.999999999935218	0	1	248	34449
[]	uncharacterized protein LOC18108205	1.0	0.999999999935218	0	1	248	34449
[]	O-fucosyltransferase 13 isoform X1	1.0	0.999999999935218	0	1	248	34449
[]	translin	1.0	0.999999999935218	0	1	248	34449
[]	O-fucosyltransferase 13 isoform X2	1.0	0.999999999935218	0	1	248	34449
[]	methylthioribose kinase-like	1.0	0.999999999895225	0	2	248	34448
[]	pectin acetylesterase 8 isoform X1	1.0	0.999999999935218	0	1	248	34449
[]	3-oxoacyl-[acyl-carrier-protein] synthase, mitochondrial isoform X1	1.0	0.999999999935218	0	1	248	34449
[]	Aspartic proteinase CDR1	1.0	0.999999999935218	0	1	248	34449
[]	putative gamma-glutamylcyclotransferase At3g02910	1.0	0.999999999895225	0	2	248	34448
[]	uncharacterized protein LOC7467338 isoform X1	1.0	0.999999999935218	0	1	248	34449
[]	uncharacterized protein LOC18108214	1.0	0.999999999935218	0	1	248	34449
[]	ELMO domain-containing protein C-like isoform X2	1.0	0.999999999895225	0	2	248	34448
[]	uncharacterized protein LOC18110537	1.0	0.999999999935218	0	1	248	34449
[]	uncharacterized protein LOC18110539	1.0	0.999999999935218	0	1	248	34449
[]	uncharacterized protein LOC18108211	1.0	0.999999999935218	0	1	248	34449
[]	B2 protein-like	1.0	0.999999999895225	0	2	248	34448
[]	L-cysteine desulfhydrase	1.0	0.999999999895225	0	2	248	34448
[]	fructokinase-1	1.0	0.999999999895225	0	2	248	34448
[]	protein cornichon homolog 1 isoform X1	1.0	0.999999999895225	0	2	248	34448
[]	pentatricopeptide repeat-containing protein At4g11690	1.0	0.999999999935218	0	1	248	34449
[]	uncharacterized protein LOC7491293	1.0	0.999999999935218	0	1	248	34449
[]	linoleate 13S-lipoxygenase 2-1, chloroplastic	1.0	0.999999999895225	0	2	248	34448
[]	XS domain	1.0	0.999999999935218	0	1	248	34449
[]	aureusidin synthase-like	1.0	0.999999999935218	0	1	248	34449
[]	sulfate transporter 2.1	1.0	0.999999999895225	0	2	248	34448
[]	trinucleotide repeat-containing gene 18 protein-like	1.0	0.999999999895225	0	2	248	34448
[]	MLP-like protein 28	1.0	0.999999999895225	0	2	248	34448
[]	Sugar phosphate exchanger 2, putative	1.0	0.999999999895225	0	2	248	34448
[]	clathrin light chain 3-like	1.0	0.999999999935218	0	1	248	34449
[]	uncharacterized protein LOC18098240	1.0	0.999999999935218	0	1	248	34449
[]	syntaxin-43 isoform X1	1.0	0.999999999935218	0	1	248	34449
[]	LCM domain-containing protein	1.0	0.999999999895225	0	2	248	34448
[]	bidirectional sugar transporter SWEET10-like	1.0	1.00000000005054	0	4	248	34446
[]	Arf-GAP with Rho-GAP domain, ANK repeat and PH domain-containing protein	1.0	0.999999999935218	0	1	248	34449
[]	uncharacterized protein LOC18108223	1.0	0.999999999935218	0	1	248	34449
[]	uncharacterized protein LOC18108224	1.0	0.999999999935218	0	1	248	34449
[]	uncharacterized protein LOC18108222	1.0	0.999999999935218	0	1	248	34449
[]	APO protein 3, mitochondrial	1.0	0.999999999935218	0	1	248	34449
[]	zinc finger protein MAGPIE-like	1.0	0.999999999895225	0	2	248	34448
[]	abscisic acid 8'-hydroxylase 4 isoform X1	1.0	0.999999999935218	0	1	248	34449
[]	protein POLLENLESS 3-LIKE 2-like	1.0	0.999999999895225	0	2	248	34448
[]	uncharacterized protein LOC7462795 isoform X2	1.0	0.999999999935218	0	1	248	34449
[]	NADH-ubiquinone reductase complex 1 MLRQ subunit-like protein	1.0	0.999999999935218	0	1	248	34449
[]	protein DEHYDRATION-INDUCED 19-like	1.0	0.999999999935218	0	1	248	34449
[]	E3 ubiquitin-protein ligase HOS1-like	1.0	0.999999999895225	0	2	248	34448
[]	golgin subfamily A member 1 isoform X1	1.0	0.999999999935218	0	1	248	34449
[]	probable ubiquitin conjugation factor E4	1.0	0.999999999895225	0	2	248	34448
[]	hypothetical protein POPTR_006G273500	1.0	0.999999999895225	0	2	248	34448
[]	zinc finger protein BRUTUS isoform X2	1.0	0.999999999935218	0	1	248	34449
[]	nuclear poly(A) polymerase 4 isoform X1	1.0	0.999999999895225	0	2	248	34448
[]	protein disulfide isomerase-like 2-3	1.0	0.999999999935218	0	1	248	34449
[]	zinc finger protein BRUTUS isoform X1	1.0	0.999999999895225	0	2	248	34448
[]	hypothetical protein POPTR_014G089900	1.0	0.999999999935218	0	1	248	34449
[]	FHA domain-containing protein DDL	1.0	0.999999999895225	0	2	248	34448
[]	importin-9 isoform X1	1.0	0.999999999895225	0	2	248	34448
[]	L-tryptophan--pyruvate aminotransferase 1	1.0	0.999999999895225	0	2	248	34448
[]	uncharacterized protein LOC7493899	1.0	0.999999999935218	0	1	248	34449
[]	protein FATTY ACID EXPORT 4, chloroplastic	1.0	0.999999999895225	0	2	248	34448
[OVER]	small heat shock protein, chloroplastic-like	1.0	0.02128987698818279	1	2	247	34448
[]	uncharacterized protein LOC7466278	1.0	0.999999999935218	0	1	248	34449
[]	vignain	1.0	1.0000000000094642	0	3	248	34447
[]	uncharacterized protein LOC7474899 isoform X1	1.0	0.999999999935218	0	1	248	34449
[]	protein JASON	1.0	0.999999999935218	0	1	248	34449
[]	organ-specific protein S2 isoform X3	1.0	0.999999999935218	0	1	248	34449
[]	MLP-like protein 43	1.0	0.999999999935218	0	1	248	34449
[OVER]	2S sulfur-rich seed storage protein 2-like	1.0	0.007147386016652852	1	0	247	34450
[]	zinc finger protein GIS2-like	1.0	0.999999999935218	0	1	248	34449
[]	uncharacterized protein LOC18109149 isoform X1	1.0	0.999999999935218	0	1	248	34449
[]	ISWI chromatin-remodeling complex ATPase CHR11 isoform X1	1.0	0.999999999895225	0	2	248	34448
[]	hypothetical protein POPTR_017G084700	1.0	0.999999999935218	0	1	248	34449
[]	uncharacterized protein LOC18108604 isoform X1	1.0	0.999999999935218	0	1	248	34449
[]	exocyst complex component EXO70B1-like	1.0	1.0000000000368094	0	8	248	34442
[]	solanesyl diphosphate synthase 3, chloroplastic/mitochondrial isoform X1	1.0	0.999999999895225	0	2	248	34448
[]	probable enoyl-CoA hydratase 2, mitochondrial	1.0	0.999999999895225	0	2	248	34448
[]	hypothetical protein POPTR_006G092300	1.0	0.999999999935218	0	1	248	34449
[]	cytochrome b5 domain-containing protein RLF	1.0	0.999999999935218	0	1	248	34449
[]	hypothetical protein POPTR_013G069675	1.0	0.999999999935218	0	1	248	34449
[]	hypothetical protein POPTR_007G003700, partial	1.0	0.999999999935218	0	1	248	34449
[]	hypothetical protein POPTR_005G074601	1.0	0.999999999935218	0	1	248	34449
[]	inorganic pyrophosphatase 1-like	1.0	0.999999999895225	0	2	248	34448
[]	NADP-dependent malic enzyme	1.0	1.00000000005054	0	4	248	34446
[]	MLP-like protein 31	1.0	0.999999999895225	0	2	248	34448
[]	uncharacterized protein LOC18100338 isoform X1	1.0	0.999999999935218	0	1	248	34449
[]	protein PHLOEM PROTEIN 2-LIKE A10	1.0	1.0000000000094642	0	3	248	34447
[]	protein NRT1/ PTR FAMILY 5.10	1.0	0.99999999992532	0	5	248	34445
[]	myosin heavy chain, striated muscle	1.0	0.999999999935218	0	1	248	34449
[]	calreticulin	1.0	0.999999999895225	0	2	248	34448
[]	uncharacterized protein LOC7493222 isoform X1	1.0	0.999999999935218	0	1	248	34449
[]	arogenate dehydratase/prephenate dehydratase 1, chloroplastic	1.0	0.999999999895225	0	2	248	34448
[]	photosystem I reaction center subunit II, chloroplastic-like	1.0	0.999999999895225	0	2	248	34448
[]	uroporphyrinogen-III synthase, chloroplastic isoform X1	1.0	0.999999999935218	0	1	248	34449
[]	hexokinase-1-like	1.0	0.999999999935218	0	1	248	34449
[]	hypothetical protein POPTR_008G045532	1.0	0.999999999935218	0	1	248	34449
[]	uncharacterized protein LOC7477806 isoform X1	1.0	0.999999999935218	0	1	248	34449
[]	VQ motif-containing protein 8, chloroplastic	1.0	0.999999999935218	0	1	248	34449
[]	uncharacterized protein LOC7491040 isoform X2	1.0	0.999999999935218	0	1	248	34449
[]	uncharacterized protein LOC7493401 isoform X1	1.0	0.999999999935218	0	1	248	34449
[]	protein LUTEIN DEFICIENT 5, chloroplastic	1.0	0.999999999935218	0	1	248	34449
[]	protein virilizer homolog isoform X1	1.0	0.999999999935218	0	1	248	34449
[]	transcription termination factor MTERF4, chloroplastic	1.0	1.000000000052645	0	10	248	34440
[]	GDSL esterase/lipase At1g33811	1.0	0.999999999935218	0	1	248	34449
[]	bifunctional aspartokinase/homoserine dehydrogenase 1, chloroplastic-like	1.0	0.999999999895225	0	2	248	34448
[]	protein INVOLVED IN DE NOVO 2	1.0	0.999999999935218	0	1	248	34449
[]	hypothetical protein POPTR_017G059750	1.0	0.999999999935218	0	1	248	34449
[]	Arginine/serine-rich coiled coil protein, putative	1.0	0.999999999935218	0	1	248	34449
[]	mediator of RNA polymerase II transcription subunit 31-like	1.0	0.999999999935218	0	1	248	34449
[]	DNA-directed RNA polymerases IV and V subunit 4	1.0	0.999999999935218	0	1	248	34449
[]	Leucine-rich repeat protein kinase family protein, putative	1.0	0.999999999895225	0	2	248	34448
[]	70 kDa peptidyl-prolyl isomerase isoform X1	1.0	0.999999999935218	0	1	248	34449
[]	phosphopantetheine adenylyltransferase	1.0	0.999999999935218	0	1	248	34449
[]	Sugar/inositol transporter	1.0	0.999999999895225	0	2	248	34448
[]	high-affinity nitrate transporter 3.1	1.0	0.999999999895225	0	2	248	34448
[]	uncharacterized protein LOC7478274	1.0	0.999999999935218	0	1	248	34449
[]	jasmonic acid-amido synthetase JAR1	1.0	0.999999999895225	0	2	248	34448
[]	peptidase M	1.0	0.999999999935218	0	1	248	34449
[]	ubiquitin-like protein ATG12	1.0	0.999999999895225	0	2	248	34448
[]	protein TIFY 6B-like isoform X1	1.0	1.0000000000094642	0	3	248	34447
[]	LYR motif-containing protein At3g19508	1.0	0.999999999895225	0	2	248	34448
[]	protein TIFY 6B-like isoform X4	1.0	0.999999999935218	0	1	248	34449
[]	BES1/BZR1 homolog protein 2-like	1.0	0.999999999895225	0	2	248	34448
[]	homeobox-leucine zipper protein MERISTEM L1-like	1.0	0.999999999895225	0	2	248	34448
[]	uncharacterized protein LOC7493855	1.0	0.999999999935218	0	1	248	34449
[]	conserved oligomeric Golgi complex subunit 1-like	1.0	0.999999999895225	0	2	248	34448
[]	uncharacterized protein LOC7468898	1.0	0.999999999935218	0	1	248	34449
[OVER]	probable disease resistance protein At5g63020	1.0	0.02128987698818279	1	2	247	34448
[]	uncharacterized protein LOC7462864 isoform X1	1.0	0.999999999935218	0	1	248	34449
[]	phospho-N-acetylmuramoyl-pentapeptide-transferase homolog isoform X1	1.0	0.999999999935218	0	1	248	34449
[]	14-3-3-like protein	1.0	1.00000000005054	0	4	248	34446
[]	ER lumen protein retaining receptor	1.0	0.999999999935218	0	1	248	34449
[]	14 kDa zinc-binding protein isoform X1	1.0	0.999999999935218	0	1	248	34449
[]	poly(ADP-ribose) glycohydrolase 1 isoform X1	1.0	0.999999999935218	0	1	248	34449
[]	putative H/ACA ribonucleoprotein complex subunit 1-like protein 1	1.0	0.999999999895225	0	2	248	34448
[]	protein POLLEN DEFECTIVE IN GUIDANCE 1	1.0	0.999999999935218	0	1	248	34449
[]	DNA repair protein UVH3 isoform X1	1.0	0.999999999935218	0	1	248	34449
[]	uncharacterized protein LOC7454256	1.0	0.999999999935218	0	1	248	34449
[]	ER membrane protein complex subunit 4-like	1.0	0.999999999935218	0	1	248	34449
[]	probable serine/threonine-protein kinase At1g09600	1.0	0.999999999895225	0	2	248	34448
[]	putative F-box protein At1g67390	1.0	0.999999999935218	0	1	248	34449
[]	putative Magnesium transporter	1.0	0.999999999935218	0	1	248	34449
[]	uncharacterized protein LOC18099511	1.0	0.999999999935218	0	1	248	34449
[]	uncharacterized protein LOC7467578	1.0	0.999999999935218	0	1	248	34449
[]	trihelix transcription factor GTL1	1.0	0.9999999999930864	0	6	248	34444
[]	uncharacterized protein LOC7467579	1.0	0.999999999935218	0	1	248	34449
[]	trihelix transcription factor GTL2	1.0	0.999999999895225	0	2	248	34448
[]	probable E3 ubiquitin-protein ligase ARI7 isoform X1	1.0	0.999999999895225	0	2	248	34448
[]	nucleolar protein 58	1.0	0.999999999935218	0	1	248	34449
[]	U-box domain-containing protein 34 isoform X2	1.0	0.999999999935218	0	1	248	34449
[]	heat shock family protein	1.0	0.999999999935218	0	1	248	34449
[]	hypothetical protein DKX38_027405	1.0	0.999999999935218	0	1	248	34449
[]	hypothetical protein POPTR_010G120000	1.0	0.999999999935218	0	1	248	34449
[]	transcription factor bHLH112 isoform X2	1.0	0.999999999935218	0	1	248	34449
[]	transcription factor bHLH112 isoform X1	1.0	0.999999999935218	0	1	248	34449
[]	gallate 1-beta-glucosyltransferase	1.0	1.0000000000094642	0	3	248	34447
[]	myosin-17 isoform X1	1.0	0.999999999935218	0	1	248	34449
[]	pentatricopeptide repeat-containing protein At4g21065	1.0	0.999999999895225	0	2	248	34448
[]	dolichol kinase EVAN	1.0	0.999999999935218	0	1	248	34449
[]	30S ribosomal protein S10, chloroplastic	1.0	0.999999999895225	0	2	248	34448
[]	heat stress transcription factor A-8	1.0	0.999999999935218	0	1	248	34449
[OVER]	heat stress transcription factor A-5	1.0	0.014243891427497189	1	1	247	34449
[]	heat stress transcription factor A-3	1.0	0.999999999935218	0	1	248	34449
[]	2-hydroxy-6-oxo-6-phenylhexa-2,4-dienoate hydrolase	1.0	0.999999999935218	0	1	248	34449
[]	3beta-hydroxysteroid-dehydrogenase/decarboxylase	1.0	0.999999999895225	0	2	248	34448
[]	Programmed cell death protein 4	1.0	0.999999999935218	0	1	248	34449
[]	polygalacturonase At1g48100-like	1.0	1.00000000005054	0	4	248	34446
[]	serine/threonine-protein kinase HT1-like	1.0	1.000000000052645	0	10	248	34440
[]	Group II intron-encoded protein ltrA	1.0	0.999999999935218	0	1	248	34449
[]	pumilio homolog 12-like	1.0	1.0000000000094642	0	3	248	34447
[]	uridine-cytidine kinase C	1.0	1.0000000000094642	0	3	248	34447
[]	serine/arginine-rich splicing factor RS31 isoform X1	1.0	0.999999999895225	0	2	248	34448
[]	DEAD-box ATP-dependent RNA helicase 10-like	1.0	0.999999999935218	0	1	248	34449
[]	hypothetical protein POPTR_008G019250	1.0	0.999999999935218	0	1	248	34449
[]	Ankyrin repeat family protein	1.0	0.999999999935218	0	1	248	34449
[]	transcription termination factor MTERF5, chloroplastic	1.0	0.999999999895225	0	2	248	34448
[]	peroxisomal (S)-2-hydroxy-acid oxidase	1.0	1.0000000000094642	0	3	248	34447
[]	potassium channel AKT2/3	1.0	0.999999999935218	0	1	248	34449
[]	SUP1	1.0	0.999999999895225	0	2	248	34448
[]	hypothetical protein POPTR_005G133400	1.0	0.999999999935218	0	1	248	34449
[]	exocyst complex component SEC3A isoform X1	1.0	0.999999999935218	0	1	248	34449
[]	wall-associated receptor kinase-like 8 isoform X1	1.0	0.999999999895225	0	2	248	34448
[]	hypothetical protein POPTR_008G105850	1.0	0.999999999935218	0	1	248	34449
[]	MADS-box protein FLOWERING LOCUS C-like isoform X1	1.0	0.999999999895225	0	2	248	34448
[]	F-box/kelch-repeat protein At1g80440	1.0	0.999999999895225	0	2	248	34448
[]	hypothetical protein POPTR_019G012601	1.0	0.999999999935218	0	1	248	34449
[]	F-box/kelch-repeat protein At1g67480	1.0	0.999999999935218	0	1	248	34449
[]	cyclin-dependent kinase C-2-like	1.0	0.999999999895225	0	2	248	34448
[]	cell division topological specificity factor homolog, chloroplastic	1.0	1.0000000000094642	0	3	248	34447
[]	protein MEI2-like 1 isoform X1	1.0	1.0000000000094642	0	3	248	34447
[]	pentatricopeptide repeat-containing protein At3g58590	1.0	0.999999999935218	0	1	248	34449
[]	RNA polymerase beta subunit (chloroplast)	1.0	0.999999999935218	0	1	248	34449
[]	zinc finger protein ZOP1	1.0	0.999999999935218	0	1	248	34449
[]	serine/threonine-protein phosphatase 2A activator isoform X2	1.0	0.999999999935218	0	1	248	34449
[]	cytoplasmic 60S subunit biogenesis factor REI1 homolog 1	1.0	0.999999999895225	0	2	248	34448
[]	uncharacterized protein LOC7466260	1.0	0.999999999935218	0	1	248	34449
[]	uncharacterized protein LOC7467591	1.0	0.999999999935218	0	1	248	34449
[]	aspartate aminotransferase, chloroplastic	1.0	0.999999999895225	0	2	248	34448
[]	breast cancer type 1 susceptibility protein homolog	1.0	0.999999999935218	0	1	248	34449
[]	cysteine-rich repeat secretory protein 38-like isoform X1	1.0	0.999999999935218	0	1	248	34449
[]	protein PIN-LIKES 3-like isoform X1	1.0	0.999999999935218	0	1	248	34449
[]	putative methyltransferase At1g22800	1.0	0.999999999935218	0	1	248	34449
[]	sulfite oxidase	1.0	0.999999999935218	0	1	248	34449
[]	inorganic phosphate transporter 1-4-like	1.0	1.0000000000094642	0	3	248	34447
[]	protein DETOXIFICATION 49-like	1.0	0.999999999935218	0	1	248	34449
[]	cell wall protein RBR3-like isoform X1	1.0	0.999999999895225	0	2	248	34448
[]	CMP-sialic acid transporter 5	1.0	0.999999999935218	0	1	248	34449
[]	CMP-sialic acid transporter 3	1.0	0.999999999935218	0	1	248	34449
[]	CMP-sialic acid transporter 4	1.0	0.999999999935218	0	1	248	34449
[]	CMP-sialic acid transporter 1	1.0	0.999999999895225	0	2	248	34448
[]	protein argonaute 10	1.0	0.999999999895225	0	2	248	34448
[]	chloroplast processing peptidase	1.0	0.999999999895225	0	2	248	34448
[]	protein argonaute 16	1.0	0.999999999935218	0	1	248	34449
[]	probable inactive ATP-dependent zinc metalloprotease FTSHI 2, chloroplastic	1.0	0.999999999935218	0	1	248	34449
[]	protein FAR1-RELATED SEQUENCE 6-like	1.0	1.00000000005054	0	4	248	34446
[]	uncharacterized protein LOC18095066 isoform X3	1.0	0.999999999935218	0	1	248	34449
[]	C2H2 zinc finger	1.0	0.999999999935218	0	1	248	34449
[]	uncharacterized protein LOC7467654	1.0	0.999999999935218	0	1	248	34449
[]	pectinesterase PPME1-like	1.0	1.0000000000368094	0	8	248	34442
[]	diacylglycerol kinase 5-like	1.0	0.999999999935218	0	1	248	34449
[]	20 kDa chaperonin, chloroplastic	1.0	0.999999999895225	0	2	248	34448
[]	uncharacterized protein LOC7468986	1.0	0.999999999935218	0	1	248	34449
[]	uncharacterized protein LOC7466320	1.0	0.999999999935218	0	1	248	34449
[]	ferritin-3, chloroplastic-like	1.0	0.999999999895225	0	2	248	34448
[]	tRNA-specific adenosine deaminase 1 isoform X1	1.0	0.999999999935218	0	1	248	34449
[]	G-box-binding factor-like isoform X2	1.0	0.999999999935218	0	1	248	34449
[]	F-box/kelch-repeat protein At1g16250 isoform X1	1.0	0.999999999935218	0	1	248	34449
[]	G-box-binding factor-like isoform X1	1.0	0.999999999935218	0	1	248	34449
[OVER]	protein SHORT HYPOCOTYL IN WHITE LIGHT 1	1.0	0.014243891427497189	1	1	247	34449
[]	RRP12-like protein	1.0	0.999999999895225	0	2	248	34448
[]	probable S-adenosylmethionine-dependent methyltransferase At5g38780 isoform X2	1.0	1.0000000000094642	0	3	248	34447
[]	Peptidyl-prolyl cis-trans isomerases isoform 1	1.0	0.999999999895225	0	2	248	34448
[]	RNA-binding protein CP29B, chloroplastic	1.0	0.999999999895225	0	2	248	34448
[]	translation initiation factor eIF-2B subunit beta-like isoform X1	1.0	0.999999999935218	0	1	248	34449
[]	hypothetical protein POPTR_001G181701	1.0	0.999999999935218	0	1	248	34449
[]	ethylene-responsive transcription factor ERF022-like	1.0	1.0000000000094642	0	3	248	34447
[]	arf-GAP domain and FG repeat-containing protein 1 isoform X1	1.0	0.999999999895225	0	2	248	34448
[]	hypothetical protein D5086_0000177790	1.0	0.999999999935218	0	1	248	34449
[]	late embryogenesis abundant protein Lea14-A	1.0	0.999999999895225	0	2	248	34448
[]	Tetratricopeptide repeat protein 1	1.0	0.999999999895225	0	2	248	34448
[]	isocitrate dehydrogenase [NAD] regulatory subunit 1, mitochondrial	1.0	0.999999999895225	0	2	248	34448
[]	ras-related protein RABC2a	1.0	0.999999999895225	0	2	248	34448
[]	egg cell-secreted protein 1.2-like	1.0	0.999999999935218	0	1	248	34449
[]	hypothetical protein POPTR_017G120700	1.0	0.999999999935218	0	1	248	34449
[]	protein UNUSUAL FLORAL ORGANS-like	1.0	0.999999999935218	0	1	248	34449
[]	1,4-alpha-glucan-branching enzyme 1, chloroplastic/amyloplastic-like isoform X1	1.0	0.999999999935218	0	1	248	34449
[]	BTB/POZ domain-containing protein POB1-like	1.0	0.999999999895225	0	2	248	34448
[]	alpha-galactosidase-like	1.0	0.999999999895225	0	2	248	34448
[]	hypothetical protein POPTR_015G008200	1.0	0.999999999935218	0	1	248	34449
[]	uncharacterized protein LOC7455816 isoform X1	1.0	0.999999999935218	0	1	248	34449
[]	AT-hook motif nuclear-localized protein 9-like	1.0	1.00000000005054	0	4	248	34446
[]	uncharacterized protein LOC7468990	1.0	0.999999999935218	0	1	248	34449
[]	protein LYK2	1.0	0.999999999935218	0	1	248	34449
[]	UPF0235 protein C15orf40 homolog	1.0	0.999999999935218	0	1	248	34449
[]	protein ELC-like	1.0	1.0000000000094642	0	3	248	34447
[]	thioredoxin-like protein YLS8	1.0	0.999999999935218	0	1	248	34449
[]	protein LYK5	1.0	0.999999999895225	0	2	248	34448
[]	ethylene-responsive transcription factor RAP2-12-like	1.0	0.999999999895225	0	2	248	34448
[]	polypyrimidine tract-binding protein homolog 1 isoform X1	1.0	0.999999999895225	0	2	248	34448
[]	actin-like protein	1.0	0.999999999935218	0	1	248	34449
[]	hypothetical protein POPTR_T010050	1.0	0.999999999935218	0	1	248	34449
[]	30S ribosomal protein S16-2, chloroplastic/mitochondrial	1.0	0.999999999935218	0	1	248	34449
[]	pentatricopeptide repeat-containing protein At3g46610	1.0	0.999999999935218	0	1	248	34449
[]	monocopper oxidase-like protein SKU5 isoform X1	1.0	0.999999999935218	0	1	248	34449
[]	hypothetical protein POPTR_014G185600	1.0	0.999999999935218	0	1	248	34449
[]	protein SCO1 homolog 2, mitochondrial	1.0	0.999999999895225	0	2	248	34448
[]	uncharacterized protein LOC7454369	1.0	0.999999999935218	0	1	248	34449
[]	glutathione S-transferase	1.0	1.0000000000094642	0	3	248	34447
[]	adenine phosphoribosyltransferase 1-like	1.0	0.999999999935218	0	1	248	34449
[]	heavy metal-associated isoprenylated plant protein 47-like	1.0	0.99999999992532	0	5	248	34445
[]	uncharacterized zinc finger protein At4g06634-like	1.0	0.999999999935218	0	1	248	34449
[]	aquaporin SIP1-1-like	1.0	1.0000000000094642	0	3	248	34447
[]	3-oxoacyl-[acyl-carrier-protein] reductase 4	1.0	0.999999999895225	0	2	248	34448
[]	ankyrin repeat-containing protein At2g01680-like isoform X1	1.0	0.999999999935218	0	1	248	34449
[]	hypothetical protein POPTR_005G072000	1.0	0.999999999935218	0	1	248	34449
[]	uncharacterized protein LOC7467600	1.0	0.999999999935218	0	1	248	34449
[]	uncharacterized protein LOC7468930	1.0	0.999999999935218	0	1	248	34449
[]	transformation/transcription domain-associated protein isoform X1	1.0	0.999999999895225	0	2	248	34448
[]	putative ubiquitin-conjugating enzyme E2 38 isoform X1	1.0	0.999999999935218	0	1	248	34449
[]	Twist-related 1	1.0	0.999999999935218	0	1	248	34449
[]	probable acyl-activating enzyme 1, peroxisomal	1.0	1.00000000005054	0	4	248	34446
[]	LOC105420923 isoform	1.0	0.999999999895225	0	2	248	34448
[]	Protein-methionine-sulfoxide reductase catalytic subunit MsrP like	1.0	0.999999999935218	0	1	248	34449
[]	probable sugar phosphate/phosphate translocator At3g11320	1.0	1.00000000005054	0	4	248	34446
[]	probable voltage-gated potassium channel subunit beta	1.0	0.999999999935218	0	1	248	34449
[]	U-box domain-containing protein 16-like	1.0	0.999999999895225	0	2	248	34448
[]	probable zinc metallopeptidase EGY3, chloroplastic	1.0	0.999999999935218	0	1	248	34449
[]	zinc finger protein ZAT11-like	1.0	0.999999999895225	0	2	248	34448
[]	protein EARLY-RESPONSIVE TO DEHYDRATION 7, chloroplastic-like	1.0	0.999999999895225	0	2	248	34448
[]	protein ACCELERATED CELL DEATH 6	1.0	1.000000000045962	0	9	248	34441
[]	exopolygalacturonase	1.0	1.00000000005054	0	4	248	34446
[]	thiosulfate sulfurtransferase 16, chloroplastic-like	1.0	0.999999999935218	0	1	248	34449
[]	peroxisome biogenesis protein 3-2-like	1.0	0.999999999935218	0	1	248	34449
[]	lysine-specific demethylase JMJ18-like	1.0	0.999999999895225	0	2	248	34448
[]	40S ribosomal protein S9	1.0	0.999999999935218	0	1	248	34449
[]	40S ribosomal protein S6	1.0	1.00000000005054	0	4	248	34446
[]	40S ribosomal protein S5	1.0	0.999999999895225	0	2	248	34448
[]	40S ribosomal protein S8	1.0	1.0000000000094642	0	3	248	34447
[]	40S ribosomal protein S7	1.0	0.99999999992532	0	5	248	34445
[]	pyruvate kinase isozyme G, chloroplastic	1.0	0.999999999895225	0	2	248	34448
[]	pentatricopeptide repeat-containing protein At5g48910	1.0	0.999999999935218	0	1	248	34449
[]	E3 ubiquitin-protein ligase RGLG4	1.0	0.999999999935218	0	1	248	34449
[]	putative EG45-like domain containing protein 1	1.0	0.999999999935218	0	1	248	34449
[]	protein phosphatase 1 regulatory subunit INH3	1.0	0.999999999935218	0	1	248	34449
[]	40S ribosomal protein SA	1.0	1.0000000000094642	0	3	248	34447
[]	E3 ubiquitin-protein ligase RGLG2	1.0	1.0000000000094642	0	3	248	34447
[]	Npa1 domain-containing protein	1.0	0.999999999935218	0	1	248	34449
[]	scopoletin glucosyltransferase-like	1.0	0.999999999956023	0	16	248	34434
[]	protein PAT1 homolog 1 isoform X1	1.0	0.999999999895225	0	2	248	34448
[]	zinc knuckle CCHC-type family protein	1.0	0.999999999935218	0	1	248	34449
[]	CHD3-type chromatin-remodeling factor PICKLE	1.0	0.999999999895225	0	2	248	34448
[]	purine permease 1-like	1.0	0.999999999935218	0	1	248	34449
[]	putative BPI/LBP family protein At1g04970	1.0	0.999999999895225	0	2	248	34448
[]	Coiled-coil domain-containing protein 18, putative isoform 2	1.0	0.999999999895225	0	2	248	34448
[]	protein PATRONUS 1	1.0	0.999999999935218	0	1	248	34449
[]	enhancer of polycomb-like transcription factor protein	1.0	0.999999999895225	0	2	248	34448
[]	pentatricopeptide repeat-containing protein At3g22690	1.0	0.999999999935218	0	1	248	34449
[]	protein LTV1 homolog	1.0	0.999999999895225	0	2	248	34448
[]	zinc finger CCCH domain-containing protein 30-like	1.0	0.99999999992532	0	5	248	34445
[]	hypothetical protein POPTR_005G096000	1.0	0.999999999935218	0	1	248	34449
[]	ribosomal protein S11 (chloroplast)	1.0	0.999999999935218	0	1	248	34449
[]	putative LRR receptor-like serine/threonine-protein kinase	1.0	0.999999999895225	0	2	248	34448
[]	large proline-rich protein BAG6 isoform X1	1.0	0.999999999895225	0	2	248	34448
[]	zf-CCHC domain-containing protein/UBN2 domain-containing protein	1.0	0.999999999935218	0	1	248	34449
[]	MAR-binding filament-like protein 1 isoform 1	1.0	0.999999999895225	0	2	248	34448
[]	hypothetical protein POPTR_016G052200	1.0	0.999999999935218	0	1	248	34449
[]	inactive LRR receptor-like serine/threonine-protein kinase BIR2	1.0	1.00000000005054	0	4	248	34446
[]	FRIGIDA-like protein 5	1.0	0.99999999992532	0	5	248	34445
[]	FRIGIDA-like protein 3	1.0	1.0000000000094642	0	3	248	34447
[]	protein TOC75-3, chloroplastic	1.0	0.999999999895225	0	2	248	34448
[]	RING/FYVE/PHD zinc finger superfamily protein, putative isoform 1	1.0	0.999999999895225	0	2	248	34448
[]	RALF-LIKE 27 family protein	1.0	0.999999999935218	0	1	248	34449
[]	RHOMBOID-like protein 12, mitochondrial	1.0	0.999999999935218	0	1	248	34449
[]	chitinase 2-like	1.0	0.99999999992532	0	5	248	34445
[]	probable E3 ubiquitin-protein ligase bre1 isoform X3	1.0	0.999999999935218	0	1	248	34449
[]	carbamoyl-phosphate synthase large chain, chloroplastic	1.0	0.999999999895225	0	2	248	34448
[]	splicing factor U2af large subunit B	1.0	0.999999999935218	0	1	248	34449
[]	translation initiation factor	1.0	0.999999999935218	0	1	248	34449
[]	glycerophosphodiester phosphodiesterase protein kinase domain-containing GDPDL2-like	1.0	0.999999999935218	0	1	248	34449
[]	uncharacterized protein LOC7455656	1.0	0.999999999935218	0	1	248	34449
[]	leucine--tRNA ligase, cytoplasmic-like isoform X1	1.0	0.999999999895225	0	2	248	34448
[]	calcium-transporting ATPase 2, plasma membrane-type-like	1.0	0.999999999935218	0	1	248	34449
[]	ATP synthase CF1 beta subunit (chloroplast)	1.0	0.999999999935218	0	1	248	34449
[]	Gamma-irradiation and mitomycin c induced 1	1.0	0.999999999935218	0	1	248	34449
[]	3-dehydroquinate synthase, chloroplastic	1.0	0.999999999935218	0	1	248	34449
[]	increased DNA methylation 1 isoform X1	1.0	1.0000000000094642	0	3	248	34447
[]	bifunctional aspartate aminotransferase and glutamate/aspartate-prephenate aminotransferase	1.0	0.999999999895225	0	2	248	34448
[]	potassium transporter 25-like	1.0	0.999999999935218	0	1	248	34449
[]	embryo sac development arrest protein	1.0	0.999999999935218	0	1	248	34449
[]	protein GAST1-like	1.0	0.999999999935218	0	1	248	34449
[]	protein translocase subunit SecA, chloroplastic	1.0	0.999999999935218	0	1	248	34449
[]	M-phase phosphoprotein 6	1.0	0.999999999935218	0	1	248	34449
[]	guanine nucleotide-binding protein alpha-1 subunit	1.0	0.999999999935218	0	1	248	34449
[]	UDP-galactose/UDP-glucose transporter 5B	1.0	0.999999999935218	0	1	248	34449
[]	phosphatidyl ethanolamine binding protein-like protein	1.0	0.999999999935218	0	1	248	34449
[]	protein FMP32, mitochondrial	1.0	0.999999999935218	0	1	248	34449
[]	agamous-like MADS-box protein AGL11 isoform X4	1.0	0.999999999935218	0	1	248	34449
[]	agamous-like MADS-box protein AGL11 isoform X2	1.0	0.999999999935218	0	1	248	34449
[]	LMBR1 domain-containing protein 2 homolog A isoform X1	1.0	0.999999999895225	0	2	248	34448
[]	TIMELESS-interacting protein	1.0	0.999999999935218	0	1	248	34449
[]	Glutamate racemase	1.0	0.999999999935218	0	1	248	34449
[]	BTB/POZ and MATH domain-containing protein 2-like	1.0	0.999999999935218	0	1	248	34449
[]	cold-regulated protein 27-like	1.0	0.999999999895225	0	2	248	34448
[]	uncharacterized protein LOC7495697 isoform X1	1.0	0.999999999935218	0	1	248	34449
[]	magnesium-dependent phosphatase 1	1.0	0.999999999895225	0	2	248	34448
[]	nuclear pore complex protein NUP96	1.0	0.999999999935218	0	1	248	34449
[]	cysteine-rich receptor-like protein kinase 42	1.0	0.999999999935218	0	1	248	34449
[]	villin-1 isoform X1	1.0	0.999999999935218	0	1	248	34449
[]	kunitz trypsin inhibitor 4	1.0	0.999999999935218	0	1	248	34449
[]	kunitz trypsin inhibitor 3	1.0	0.999999999935218	0	1	248	34449
[]	kunitz trypsin inhibitor 2	1.0	1.00000000005054	0	4	248	34446
[]	protein TPR2-like isoform X2	1.0	0.999999999935218	0	1	248	34449
[]	GDSL esterase/lipase 1	1.0	1.0000000000368094	0	8	248	34442
[]	protein phosphatase 1 regulatory inhibitor subunit PPP1R8 homolog	1.0	0.999999999895225	0	2	248	34448
[]	GDSL esterase/lipase 6	1.0	0.999999999935218	0	1	248	34449
[]	GDSL esterase/lipase 5	1.0	0.999999999895225	0	2	248	34448
[]	uncharacterized protein LOC7494597 isoform X1	1.0	0.999999999935218	0	1	248	34449
[]	GDSL esterase/lipase 7	1.0	0.999999999935218	0	1	248	34449
[]	protein NRT1/ PTR FAMILY 3.1-like	1.0	0.999999999895225	0	2	248	34448
[]	short-chain dehydrogenase reductase ATA1	1.0	0.999999999895225	0	2	248	34448
[]	nuclear pore complex protein NUP88	1.0	0.999999999895225	0	2	248	34448
[]	GPI ethanolamine phosphate transferase 3	1.0	0.999999999935218	0	1	248	34449
[]	pentatricopeptide repeat-containing protein At5g59600-like	1.0	0.999999999935218	0	1	248	34449
[]	uncharacterized protein LOC7456829 isoform X1	1.0	0.999999999935218	0	1	248	34449
[]	lysine-specific demethylase JMJ25-like	1.0	0.99999999992532	0	5	248	34445
[]	nuclear pore complex protein NUP85	1.0	0.999999999935218	0	1	248	34449
[]	heavy metal-associated isoprenylated plant protein 41-like	1.0	0.999999999895225	0	2	248	34448
[]	MADS-box protein JOINTLESS	1.0	1.00000000005054	0	4	248	34446
[]	hypothetical protein POPTR_003G203300	1.0	0.999999999935218	0	1	248	34449
[]	Protein DENND6A	1.0	0.999999999935218	0	1	248	34449
[]	UDP-glucose dehydrogenase	1.0	0.999999999895225	0	2	248	34448
[]	putative clathrin assembly protein At5g35200	1.0	1.00000000005054	0	4	248	34446
[]	protein DETOXIFICATION 55	1.0	0.999999999935218	0	1	248	34449
[]	protein DETOXIFICATION 54	1.0	0.999999999895225	0	2	248	34448
[]	protein DETOXIFICATION 56	1.0	0.999999999895225	0	2	248	34448
[]	GPI mannosyltransferase 1 isoform X1	1.0	0.999999999935218	0	1	248	34449
[]	APO protein 4, mitochondrial	1.0	0.999999999935218	0	1	248	34449
[]	probable leucine-rich repeat receptor-like protein kinase At2g33170	1.0	0.999999999895225	0	2	248	34448
[]	proteasome assembly chaperone 3-like isoform X1	1.0	0.999999999935218	0	1	248	34449
[]	NADH dehydrogenase [ubiquinone] 1 beta subcomplex subunit 7	1.0	0.999999999895225	0	2	248	34448
[]	importin subunit beta-1	1.0	0.999999999895225	0	2	248	34448
[]	mannosyl-oligosaccharide glucosidase GCS1	1.0	0.999999999935218	0	1	248	34449
[]	NADH dehydrogenase [ubiquinone] 1 beta subcomplex subunit 9	1.0	0.999999999895225	0	2	248	34448
[]	cytochrome b561 and DOMON domain-containing protein At5g47530	1.0	1.0000000000368094	0	8	248	34442
[]	universal stress protein PHOS32 isoform X2	1.0	1.00000000005054	0	4	248	34446
[]	Endoribonuclease Dicer	1.0	0.999999999935218	0	1	248	34449
[]	Latency-related protein	1.0	0.999999999935218	0	1	248	34449
[]	universal stress protein PHOS32 isoform X1	1.0	0.999999999895225	0	2	248	34448
[]	ubiquitin-like modifier-activating enzyme 5 isoform X2	1.0	0.999999999935218	0	1	248	34449
[]	protein SMG7	1.0	0.999999999935218	0	1	248	34449
[]	hypothetical protein POPTR_003G084300	1.0	0.999999999935218	0	1	248	34449
[]	polyadenylate-binding protein RBP47-like	1.0	1.00000000005054	0	4	248	34446
[]	pentatricopeptide repeat-containing protein At5g15280, mitochondrial	1.0	0.999999999935218	0	1	248	34449
[]	spastin isoform X1	1.0	0.999999999935218	0	1	248	34449
[]	protein GRAVITROPIC IN THE LIGHT 1	1.0	1.000000000045962	0	9	248	34441
[]	NAC domain-containing protein 82 isoform X1	1.0	0.999999999895225	0	2	248	34448
[]	uncharacterized protein LOC18097087	1.0	0.999999999935218	0	1	248	34449
[]	transcriptional activator DEMETER	1.0	0.999999999935218	0	1	248	34449
[]	VAN3-binding protein	1.0	0.99999999992532	0	5	248	34445
[]	hypothetical protein POPTR_001G142150	1.0	0.999999999935218	0	1	248	34449
[]	wound-induced basic protein	1.0	0.999999999895225	0	2	248	34448
[]	isoleucine--tRNA ligase, cytoplasmic	1.0	0.999999999895225	0	2	248	34448
[]	sodium/potassium/calcium exchanger 1	1.0	0.999999999935218	0	1	248	34449
[]	peptidyl-prolyl cis-trans isomerase CYP21-4	1.0	0.999999999895225	0	2	248	34448
[]	UPF0586 protein C9orf41 homolog isoform X2	1.0	0.999999999895225	0	2	248	34448
[]	peptidyl-prolyl cis-trans isomerase CYP21-1	1.0	0.999999999935218	0	1	248	34449
[]	protein DETOXIFICATION 40	1.0	0.999999999935218	0	1	248	34449
[]	protein DETOXIFICATION 42	1.0	0.999999999935218	0	1	248	34449
[]	beta-glucuronosyltransferase GlcAT14B-like	1.0	1.0000000000094642	0	3	248	34447
[]	cysteine-rich receptor-like protein kinase 10	1.0	1.0000000000347535	0	27	248	34423
[]	dirigent protein 19-like	1.0	1.0000000000094642	0	3	248	34447
[]	thymidine kinase a	1.0	0.999999999935218	0	1	248	34449
[]	protein DETOXIFICATION 35	1.0	0.999999999935218	0	1	248	34449
[]	protein DETOXIFICATION 34	1.0	0.999999999935218	0	1	248	34449
[]	thioredoxin-like fold domain-containing protein MRL7, chloroplastic	1.0	0.999999999935218	0	1	248	34449
[]	B-box zinc finger protein 18-like isoform X1	1.0	0.999999999935218	0	1	248	34449
[]	transcription factor MYB93-like	1.0	0.999999999895225	0	2	248	34448
[]	Ribosomal protein L34e superfamily protein	1.0	0.999999999935218	0	1	248	34449
[]	uncharacterized protein LOC111402544	1.0	0.999999999935218	0	1	248	34449
[]	probable cellulose synthase A catalytic subunit 3 [UDP-forming]	1.0	0.999999999895225	0	2	248	34448
[]	zinc finger protein CONSTANS-LIKE 4-like	1.0	1.00000000005054	0	4	248	34446
[]	B3 domain-containing transcription factor VRN1-like isoform X1	1.0	0.999999999895225	0	2	248	34448
[]	pathogenesis-related genes transcriptional activator PTI5	1.0	0.999999999935218	0	1	248	34449
[]	lipase-like PAD4	1.0	0.999999999895225	0	2	248	34448
[]	membralin-like protein At1g60995 isoform X1	1.0	0.999999999935218	0	1	248	34449
[]	transcription factor RF2b-like	1.0	0.999999999935218	0	1	248	34449
[]	NADH dehydrogenase [ubiquinone] 1 beta subcomplex subunit 2	1.0	0.999999999895225	0	2	248	34448
[]	uncharacterized protein LOC7464840 isoform X1	1.0	0.999999999935218	0	1	248	34449
[]	probable L-type lectin-domain containing receptor kinase S.5 isoform X2	1.0	0.999999999935218	0	1	248	34449
[]	phytolongin Phyl2.2	1.0	0.999999999895225	0	2	248	34448
[]	Bromodomain 4, putative	1.0	0.999999999935218	0	1	248	34449
[]	protein DETOXIFICATION 53	1.0	0.999999999935218	0	1	248	34449
[]	Core-2/I-branching beta-1,6-N-acetylglucosaminyltransferase family protein, putative isoform 1	1.0	0.999999999895225	0	2	248	34448
[]	pectinesterase 2	1.0	1.0000000000094642	0	3	248	34447
[]	tRNA (guanine(9)-N1)-methyltransferase	1.0	0.999999999895225	0	2	248	34448
[]	14 kDa proline-rich protein DC2.15	1.0	0.999999999935218	0	1	248	34449
[]	pectinesterase 1	1.0	0.999999999935218	0	1	248	34449
[]	pectinesterase 3	1.0	1.0000000000094642	0	3	248	34447
[]	mitochondrial carrier protein MTM1	1.0	0.999999999895225	0	2	248	34448
[]	hypothetical protein POPTR_018G055900	1.0	0.999999999935218	0	1	248	34449
[OVER]	auxin-responsive protein IAA27-like	1.0	0.007147386016652852	1	0	247	34450
[]	NADPH oxidase activator	1.0	0.999999999935218	0	1	248	34449
[]	protein DETOXIFICATION 49	1.0	1.0000000000094642	0	3	248	34447
[]	protein DETOXIFICATION 43	1.0	0.999999999895225	0	2	248	34448
[]	feruloyl CoA ortho-hydroxylase 1-like	1.0	0.99999999992532	0	5	248	34445
[]	cysteine synthase-like isoform X1	1.0	1.0000000000094642	0	3	248	34447
[]	E3 ubiquitin ligase BIG BROTHER-related	1.0	0.999999999935218	0	1	248	34449
[]	chaperone protein ClpC, chloroplastic	1.0	0.999999999895225	0	2	248	34448
[]	pentatricopeptide repeat-containing protein At5g16420, mitochondrial	1.0	0.999999999935218	0	1	248	34449
[]	golgin candidate 4 isoform X1	1.0	0.999999999895225	0	2	248	34448
[]	cysteine synthase-like isoform X2	1.0	0.999999999935218	0	1	248	34449
[]	xanthine dehydrogenase 1-like isoform X1	1.0	0.999999999935218	0	1	248	34449
[]	DUF761 domain-containing protein	1.0	1.0000000000368094	0	8	248	34442
[]	Kinase superfamily protein	1.0	0.999999999895225	0	2	248	34448
[]	hypothetical protein POPTR_003G073600	1.0	0.999999999935218	0	1	248	34449
[]	alpha-1,4-glucan-protein synthase [UDP-forming] 2	1.0	0.999999999935218	0	1	248	34449
[]	uncharacterized protein LOC7455633 isoform X1	1.0	0.999999999935218	0	1	248	34449
[]	casein kinase 1-like protein 10 isoform X2	1.0	0.999999999935218	0	1	248	34449
[]	protein TRI1-like	1.0	0.999999999895225	0	2	248	34448
[]	hypothetical protein POPTR_007G086400	1.0	0.999999999935218	0	1	248	34449
[]	Clavata3/esr-related 16, putative	1.0	0.999999999895225	0	2	248	34448
[]	protein DETOXIFICATION 14	1.0	0.999999999935218	0	1	248	34449
[]	cysteine-rich receptor-like protein kinase 25	1.0	0.999999999935218	0	1	248	34449
[]	cysteine-rich receptor-like protein kinase 26	1.0	0.999999999935218	0	1	248	34449
[]	protein DETOXIFICATION 16	1.0	0.999999999935218	0	1	248	34449
[]	uncharacterized protein LOC18094759 isoform X1	1.0	0.999999999935218	0	1	248	34449
[]	auxin response factor 2B-like isoform X1	1.0	0.999999999895225	0	2	248	34448
[]	cysteine protease RD19A	1.0	0.999999999935218	0	1	248	34449
[]	protein DETOXIFICATION 12	1.0	1.0000000000094642	0	3	248	34447
[]	protein DETOXIFICATION 19	1.0	0.999999999935218	0	1	248	34449
[]	protein DETOXIFICATION 18	1.0	0.999999999935218	0	1	248	34449
[]	transcription factor MYB35-like	1.0	0.999999999895225	0	2	248	34448
[]	copper transporter 4-like	1.0	0.999999999935218	0	1	248	34449
[]	condensin complex subunit 3	1.0	0.999999999935218	0	1	248	34449
[]	probable E3 ubiquitin-protein ligase ARI7	1.0	0.999999999935218	0	1	248	34449
[]	50S ribosomal protein L31, chloroplastic	1.0	0.999999999935218	0	1	248	34449
[]	protein DYAD-like	1.0	0.999999999935218	0	1	248	34449
[]	condensin complex subunit 1	1.0	0.999999999935218	0	1	248	34449
[]	probable E3 ubiquitin-protein ligase ARI8	1.0	1.0000000000094642	0	3	248	34447
[]	condensin complex subunit 2	1.0	0.999999999935218	0	1	248	34449
[]	metal tolerance protein 9-like	1.0	1.0000000000094642	0	3	248	34447
[]	alpha tubulin 1	1.0	0.999999999935218	0	1	248	34449
[]	lipoic acid synthase family protein	1.0	0.999999999895225	0	2	248	34448
[]	probable E3 ubiquitin-protein ligase ARI3	1.0	0.999999999935218	0	1	248	34449
[]	glutamate-1-semialdehyde 2,1-aminomutase 2, chloroplastic	1.0	0.999999999895225	0	2	248	34448
[]	PREDICTED: uncharacterized protein LOC105126560 isoform X1	1.0	0.999999999935218	0	1	248	34449
[]	O-acetyl-ADP-ribose deacetylase MACROD1	1.0	0.999999999935218	0	1	248	34449
[]	hypothetical protein D5086_0000176400	1.0	0.999999999935218	0	1	248	34449
[]	cysteine-rich receptor-like protein kinase 15	1.0	0.9999999999930864	0	6	248	34444
[]	protein DETOXIFICATION 27	1.0	0.999999999935218	0	1	248	34449
[]	autophagy-related protein 8C-like isoform X1	1.0	0.999999999935218	0	1	248	34449
[]	protein DETOXIFICATION 24	1.0	0.99999999992532	0	5	248	34445
[]	DNA mismatch repair protein PMS1 isoform X1	1.0	0.999999999935218	0	1	248	34449
[]	protein DETOXIFICATION 29	1.0	0.999999999895225	0	2	248	34448
[]	enhancer of mRNA-decapping protein 4-like	1.0	0.999999999935218	0	1	248	34449
[]	transmembrane protein DDB_G0273707/DDB_G0273361 isoform X1	1.0	0.999999999935218	0	1	248	34449
[]	partner of Y14 and mago-like isoform X1	1.0	0.999999999935218	0	1	248	34449
[]	pectin acetylesterase 9	1.0	0.999999999895225	0	2	248	34448
[]	fructose-bisphosphate aldolase, cytoplasmic isozyme 1	1.0	0.999999999895225	0	2	248	34448
[]	ATP-dependent protease La domain-containing protein isoform 1	1.0	0.999999999935218	0	1	248	34449
[]	hypothetical protein POPTR_001G170000, partial	1.0	0.999999999935218	0	1	248	34449
[]	hypothetical protein POPTR_013G033500	1.0	0.999999999935218	0	1	248	34449
[]	TMV resistance protein N	1.0	0.9999999999628217	0	73	248	34377
[]	hypothetical protein POPTR_018G027100	1.0	0.999999999935218	0	1	248	34449
[]	pectin acetylesterase 6	1.0	0.999999999935218	0	1	248	34449
[]	putative transcription factor	1.0	0.999999999895225	0	2	248	34448
[]	Titin like	1.0	0.999999999895225	0	2	248	34448
[]	uncharacterized membrane protein C776.05	1.0	0.999999999895225	0	2	248	34448
[]	aldose 1-epimerase-like	1.0	1.00000000005054	0	4	248	34446
[]	epidermis-specific secreted glycoprotein EP1-like	1.0	1.0000000000368094	0	8	248	34442
[]	WD repeat-containing 55	1.0	0.999999999895225	0	2	248	34448
[]	uncharacterized protein LOC18098345	1.0	0.999999999935218	0	1	248	34449
[]	beta carbonic anhydrase 5, chloroplastic-like isoform X1	1.0	0.999999999895225	0	2	248	34448
[]	PHD finger protein ALFIN-LIKE 4	1.0	1.0000000000094642	0	3	248	34447
[]	glycine-rich protein HC1-like	1.0	0.999999999935218	0	1	248	34449
[]	methylcrotonoyl-CoA carboxylase subunit alpha, mitochondrial isoform X2	1.0	0.999999999935218	0	1	248	34449
[]	hypothetical protein POPTR_003G071050	1.0	0.999999999935218	0	1	248	34449
[]	proline iminopeptidase	1.0	0.999999999935218	0	1	248	34449
[]	receptor-like protein 13 isoform X1	1.0	0.9999999999403628	0	20	248	34430
[]	probable phosphoribosylformylglycinamidine synthase, chloroplastic/mitochondrial	1.0	0.999999999895225	0	2	248	34448
[]	boron transporter 1	1.0	0.999999999895225	0	2	248	34448
[]	phosphatidylinositol:ceramide inositolphosphotransferase 1-like	1.0	0.999999999895225	0	2	248	34448
[]	transcription factor GTE10-like isoform X1	1.0	0.999999999935218	0	1	248	34449
[]	boron transporter 4	1.0	0.999999999935218	0	1	248	34449
[]	galacturonosyltransferase 8	1.0	0.999999999895225	0	2	248	34448
[]	inner centromere protein A isoform X1	1.0	0.999999999935218	0	1	248	34449
[]	protein disulfide isomerase-like 1-6	1.0	0.999999999935218	0	1	248	34449
[]	elongation factor Ts, mitochondrial	1.0	0.999999999935218	0	1	248	34449
[]	protein disulfide isomerase-like 1-3	1.0	0.999999999895225	0	2	248	34448
[]	protein disulfide isomerase-like 1-4	1.0	0.999999999935218	0	1	248	34449
[]	Multiprotein-bridging factor 1b	1.0	0.999999999935218	0	1	248	34449
[]	uncharacterized protein LOC18109460	1.0	0.999999999935218	0	1	248	34449
[]	probable transcription factor At5g28040	1.0	0.999999999935218	0	1	248	34449
[]	TMV resistance protein N-like	1.0	0.9999999999187225	0	37	248	34413
[]	basic 7S globulin-like	1.0	0.9999999999621275	0	11	248	34439
[]	psbP domain-containing protein 6, chloroplastic	1.0	0.999999999935218	0	1	248	34449
[]	transcription factor Pur-alpha 1	1.0	0.999999999895225	0	2	248	34448
[]	probable disease resistance protein At1g12280	1.0	0.999999999935218	0	1	248	34449
[]	hypothetical protein POPTR_015G106750	1.0	0.999999999935218	0	1	248	34449
[]	protein TIFY 8 isoform X1	1.0	0.999999999935218	0	1	248	34449
[]	28S ribosomal protein S33, mitochondrial	1.0	0.999999999935218	0	1	248	34449
[]	protein DEHYDRATION-INDUCED 19 homolog 6-like isoform X2	1.0	0.999999999935218	0	1	248	34449
[]	probable ribosome biogenesis protein RLP24	1.0	0.999999999895225	0	2	248	34448
[]	ubiquitin-like modifier-activating enzyme 5	1.0	0.999999999935218	0	1	248	34449
[]	probable polyribonucleotide nucleotidyltransferase 1, chloroplastic isoform X1	1.0	0.999999999895225	0	2	248	34448
[]	aquaporin PIP2-1	1.0	0.999999999935218	0	1	248	34449
[]	uncharacterized protein LOC18098321	1.0	0.999999999935218	0	1	248	34449
[]	Mitochondrial biogenesis protein AIM	1.0	0.999999999895225	0	2	248	34448
[]	pentatricopeptide repeat-containing protein At5g09450, mitochondrial	1.0	0.999999999935218	0	1	248	34449
[]	hypothetical protein POPTR_013G045500	1.0	0.999999999935218	0	1	248	34449
[]	probable LRR receptor-like serine/threonine-protein kinase At1g63430	1.0	0.999999999895225	0	2	248	34448
[]	CASP-like protein ARALYDRAFT_485429	1.0	0.999999999935218	0	1	248	34449
[]	probable xyloglucan glycosyltransferase 6	1.0	1.0000000000094642	0	3	248	34447
[]	RNA-binding protein cabeza-like	1.0	0.999999999935218	0	1	248	34449
[OVER]	probable disease resistance protein At1g12290	1.0	0.007147386016652852	1	0	247	34450
[]	probable xyloglucan glycosyltransferase 5	1.0	0.999999999895225	0	2	248	34448
[]	DUF724 domain-containing protein 2 isoform X1	1.0	0.999999999895225	0	2	248	34448
[]	lactoylglutathione lyase	1.0	1.0000000000094642	0	3	248	34447
[]	ion channel CASTOR-like isoform X2	1.0	0.999999999935218	0	1	248	34449
[]	hypothetical protein POPTR_008G141600	1.0	0.999999999935218	0	1	248	34449
[]	hypothetical protein POPTR_008G164300	1.0	0.999999999935218	0	1	248	34449
[]	aluminum-activated malate transporter 10-like	1.0	0.999999999895225	0	2	248	34448
[]	uncharacterized protein LOC18108152	1.0	0.999999999935218	0	1	248	34449
[]	obg-like ATPase 1	1.0	1.0000000000094642	0	3	248	34447
[]	multiple inositol polyphosphate phosphatase 1-like isoform X1	1.0	0.999999999935218	0	1	248	34449
[]	uncharacterized protein LOC18110465	1.0	0.999999999935218	0	1	248	34449
[]	membrane steroid-binding protein 2-like	1.0	1.0000000000094642	0	3	248	34447
[]	pentatricopeptide repeat-containing protein At5g62370-like isoform X1	1.0	0.999999999935218	0	1	248	34449
[]	uncharacterized protein LOC18110466	1.0	0.999999999895225	0	2	248	34448
[]	EH domain-containing protein 1-like	1.0	0.999999999935218	0	1	248	34449
[]	F-box protein At3g07870-like isoform X1	1.0	0.999999999895225	0	2	248	34448
[]	phosphoribulokinase, chloroplastic	1.0	0.999999999895225	0	2	248	34448
[]	protein DJ-1 homolog B-like	1.0	0.999999999935218	0	1	248	34449
[]	phosphatidylinositol 4-kinase beta 1	1.0	0.999999999935218	0	1	248	34449
[]	VAN3-binding protein-like	1.0	0.999999999935218	0	1	248	34449
[]	psbP domain-containing protein 5, chloroplastic	1.0	0.999999999935218	0	1	248	34449
[]	cytochrome P450 710A1-like	1.0	0.999999999935218	0	1	248	34449
[]	CLAVATA3/ESR (CLE)-related protein 41-like	1.0	0.999999999935218	0	1	248	34449
[]	serine/arginine-rich SC35-like splicing factor SCL28	1.0	0.999999999895225	0	2	248	34448
[]	probable WRKY transcription factor 7 isoform X1	1.0	0.999999999895225	0	2	248	34448
[]	uncharacterized protein LOC7489069	1.0	0.999999999935218	0	1	248	34449
[]	uncharacterized protein LOC7489067	1.0	0.999999999935218	0	1	248	34449
[]	ABC transporter G family member 15-like	1.0	0.999999999895225	0	2	248	34448
[]	protein ABIL1	1.0	0.999999999895225	0	2	248	34448
[]	lysine-specific demethylase 5B isoform X1	1.0	0.999999999935218	0	1	248	34449
[]	protein ABIL2	1.0	0.999999999935218	0	1	248	34449
[]	microtubule-associated protein futsch-like	1.0	0.999999999935218	0	1	248	34449
[]	hypothetical protein POPTR_017G035600	1.0	0.999999999935218	0	1	248	34449
[]	F-box protein At5g49610	1.0	1.000000000052645	0	10	248	34440
[]	5'-nucleotidase domain-containing protein 4 isoform X1	1.0	1.0000000000094642	0	3	248	34447
[]	protein IWS1 homolog	1.0	0.999999999895225	0	2	248	34448
[]	uncharacterized protein LOC7477089	1.0	0.999999999935218	0	1	248	34449
[]	gamma-glutamyl peptidase 5-like	1.0	0.999999999895225	0	2	248	34448
[]	hypothetical protein POPTR_006G273600	1.0	0.999999999935218	0	1	248	34449
[]	serine/arginine-rich SC35-like splicing factor SCL30	1.0	0.999999999935218	0	1	248	34449
[]	metalloendoproteinase 2-MMP	1.0	0.9999999999930864	0	6	248	34444
[]	KH domain-containing protein HEN4 isoform X1	1.0	1.00000000005054	0	4	248	34446
[]	serine/arginine-rich SC35-like splicing factor SCL33	1.0	1.0000000000094642	0	3	248	34447
[]	AP2-like ethylene-responsive transcription factor At1g16060	1.0	1.00000000005054	0	4	248	34446
[]	TLC domain-containing protein At5g14285	1.0	0.999999999935218	0	1	248	34449
[]	glutamine synthetase cytosolic isozyme 1	1.0	0.999999999935218	0	1	248	34449
[]	glutamine synthetase cytosolic isozyme 2	1.0	0.999999999935218	0	1	248	34449
[]	hypothetical protein POPTR_006G260300	1.0	0.999999999935218	0	1	248	34449
[]	UDP-galactose transporter 2-like	1.0	0.999999999935218	0	1	248	34449
[]	pentatricopeptide repeat-containing protein At3g62890-like	1.0	0.999999999895225	0	2	248	34448
[]	biotin synthase, mitochondrial	1.0	0.999999999935218	0	1	248	34449
[]	chaperone protein ClpD, chloroplastic	1.0	0.999999999895225	0	2	248	34448
[]	10 kDa chaperonin-like	1.0	0.999999999895225	0	2	248	34448
[]	cytochrome P450 71A1-like	1.0	1.0000000000267937	0	12	248	34438
[]	photosystem I assembly protein Ycf3 (chloroplast)	1.0	0.999999999935218	0	1	248	34449
[]	class I heat shock protein-like	1.0	0.999999999895225	0	2	248	34448
[]	hypothetical protein POPTR_003G083000	1.0	0.999999999935218	0	1	248	34449
[]	serine/threonine-protein kinase 19 isoform X1	1.0	0.999999999935218	0	1	248	34449
[]	3-dehydrosphinganine reductase TSC10A-like isoform X1	1.0	0.999999999935218	0	1	248	34449
[]	50S ribosomal protein L3-2, chloroplastic	1.0	0.999999999895225	0	2	248	34448
[]	uncharacterized protein LOC18097033	1.0	0.999999999935218	0	1	248	34449
[]	protein AE7	1.0	0.999999999935218	0	1	248	34449
[]	ATP-dependent zinc metalloprotease FTSH 10, mitochondrial	1.0	0.999999999935218	0	1	248	34449
[]	uncharacterized protein LOC18108102	1.0	0.999999999935218	0	1	248	34449
[]	uncharacterized protein LOC18109431	1.0	0.999999999935218	0	1	248	34449
[]	transcription factor LHW	1.0	0.999999999895225	0	2	248	34448
[]	DNA-binding protein S1FA-like	1.0	0.999999999935218	0	1	248	34449
[]	F-box/LRR-repeat protein At5g63520-like	1.0	1.00000000005054	0	4	248	34446
[]	hypothetical protein POPTR_003G168400	1.0	0.999999999935218	0	1	248	34449
[]	histidine-containing phosphotransfer protein 4-like	1.0	0.999999999895225	0	2	248	34448
[]	spermidine synthase 1	1.0	0.999999999935218	0	1	248	34449
[]	ubiquitin carboxyl-terminal hydrolase 15 isoform X1	1.0	0.999999999895225	0	2	248	34448
[]	Chaperonin 60 subunit beta 4	1.0	0.999999999935218	0	1	248	34449
[]	hypothetical protein POPTR_006G093700	1.0	0.999999999935218	0	1	248	34449
[]	calcium-dependent protein kinase 28-like	1.0	0.999999999935218	0	1	248	34449
[]	Transcription factor bHLH144	1.0	0.999999999935218	0	1	248	34449
[]	peptidyl-prolyl cis-trans isomerase CYP21-4-like isoform X1	1.0	0.999999999935218	0	1	248	34449
[]	uncharacterized protein LOC7470705 isoform X1	1.0	0.999999999935218	0	1	248	34449
[]	Desiccation-related protein PCC3-06	1.0	0.999999999935218	0	1	248	34449
[]	omega-6 fatty acid desaturase, chloroplastic	1.0	0.999999999935218	0	1	248	34449
[]	root meristem growth factor 3	1.0	0.999999999935218	0	1	248	34449
[]	methylthioribose-1-phosphate isomerase	1.0	0.999999999935218	0	1	248	34449
[]	carnosine N-methyltransferase isoform X1	1.0	0.999999999935218	0	1	248	34449
[OVER]	root meristem growth factor 9	1.0	0.014243891427497189	1	1	247	34449
[]	CBL-interacting serine/threonine-protein kinase 21	1.0	0.999999999895225	0	2	248	34448
[]	pentatricopeptide repeat-containing protein At3g61520, mitochondrial	1.0	0.999999999935218	0	1	248	34449
[]	CBL-interacting serine/threonine-protein kinase 20	1.0	0.999999999935218	0	1	248	34449
[]	Metallothiol transferase	1.0	0.999999999935218	0	1	248	34449
[]	fatty acid desaturase 4, chloroplastic-like	1.0	0.999999999935218	0	1	248	34449
[]	Zinc finger matrin-type protein 1, putative isoform 1	1.0	0.999999999935218	0	1	248	34449
[]	DNA double-strand break repair Rad50 ATPase	1.0	0.999999999935218	0	1	248	34449
[]	RNA-binding protein BRN1	1.0	0.999999999935218	0	1	248	34449
[]	phosphate transporter PHO1 homolog 10	1.0	1.0000000000094642	0	3	248	34447
[]	polyadenylate-binding protein 2 isoform X1	1.0	0.999999999935218	0	1	248	34449
[]	protein AMN1 homolog	1.0	0.999999999935218	0	1	248	34449
[]	anaphase-promoting complex subunit 5 isoform X1	1.0	0.999999999935218	0	1	248	34449
[]	CBL-interacting serine/threonine-protein kinase 10	1.0	0.999999999895225	0	2	248	34448
[]	endoglucanase	1.0	0.999999999935218	0	1	248	34449
[]	CBL-interacting serine/threonine-protein kinase 11	1.0	0.999999999895225	0	2	248	34448
[]	probable E3 ubiquitin-protein ligase RHG1A isoform X1	1.0	0.999999999935218	0	1	248	34449
[]	late embryogenesis abundant protein 1-like	1.0	0.999999999935218	0	1	248	34449
[]	uncharacterized protein LOC7468365 isoform X2	1.0	0.999999999935218	0	1	248	34449
[]	auxin-induced protein AUX28-like	1.0	0.999999999895225	0	2	248	34448
[]	centrosome-associated protein CEP250-like isoform X1	1.0	1.0000000000094642	0	3	248	34447
[]	uncharacterized protein LOC7480692	1.0	0.999999999935218	0	1	248	34449
[]	uncharacterized protein LOC7465074	1.0	0.999999999935218	0	1	248	34449
[]	pentatricopeptide repeat-containing protein At3g56030	1.0	0.999999999935218	0	1	248	34449
[]	tetratricopeptide repeat protein 4 homolog isoform X1	1.0	0.999999999935218	0	1	248	34449
[]	rop guanine nucleotide exchange factor 1-like	1.0	0.999999999895225	0	2	248	34448
[]	uridylate kinase	1.0	0.999999999935218	0	1	248	34449
[]	chorismate mutase 1, chloroplastic-like	1.0	0.999999999935218	0	1	248	34449
[]	uncharacterized protein LOC7497426 isoform X2	1.0	0.999999999935218	0	1	248	34449
[]	gibberellin 20 oxidase 1-like	1.0	0.999999999895225	0	2	248	34448
[]	glucuronokinase 1	1.0	0.999999999935218	0	1	248	34449
[]	cyclase-associated protein 1-like	1.0	0.999999999895225	0	2	248	34448
[]	beta-carotene hydroxylase 2, chloroplastic-like	1.0	0.999999999895225	0	2	248	34448
[]	putative pentatricopeptide repeat-containing protein At4g17915	1.0	0.999999999935218	0	1	248	34449
[]	pectinesterase QRT1	1.0	0.999999999935218	0	1	248	34449
[]	cysteine proteinase inhibitor 6	1.0	0.999999999935218	0	1	248	34449
[]	pentatricopeptide repeat-containing protein At5g61800	1.0	0.999999999935218	0	1	248	34449
[]	non-lysosomal glucosylceramidase isoform X1	1.0	0.999999999935218	0	1	248	34449
[]	cysteine proteinase inhibitor 5	1.0	0.999999999895225	0	2	248	34448
[]	probable terpene synthase 12	1.0	0.999999999935218	0	1	248	34449
[]	3-hydroxyisobutyryl-CoA hydrolase-like protein 5 isoform X1	1.0	0.999999999935218	0	1	248	34449
[]	psbP domain-containing protein 4, chloroplastic	1.0	0.999999999935218	0	1	248	34449
[]	transcription elongation factor 1 homolog	1.0	1.0000000000094642	0	3	248	34447
[]	orf107b gene product (mitochondrion)	1.0	0.999999999935218	0	1	248	34449
[]	F-box protein At3g12350	1.0	0.999999999935218	0	1	248	34449
[]	exopolygalacturonase clone GBGA483-like	1.0	0.999999999935218	0	1	248	34449
[]	putative disease resistance protein At4g19050	1.0	0.999999999935218	0	1	248	34449
[]	hypothetical protein POPTR_005G206901	1.0	0.999999999935218	0	1	248	34449
[]	membrane insertase, putative (DUF1685)	1.0	0.999999999935218	0	1	248	34449
[]	COPI_assoc domain-containing protein	1.0	0.999999999935218	0	1	248	34449
[]	pentatricopeptide repeat-containing protein At2g22410, mitochondrial	1.0	0.999999999935218	0	1	248	34449
[]	vesicle-associated membrane protein 711	1.0	0.999999999895225	0	2	248	34448
[]	uncharacterized protein LOC7465097	1.0	0.999999999935218	0	1	248	34449
[]	O-acyltransferase WSD1-like	1.0	1.0000000000368094	0	8	248	34442
[]	SKI/DACH domain-containing protein 1-like	1.0	0.999999999935218	0	1	248	34449
[]	vesicle-associated membrane protein 714	1.0	0.999999999895225	0	2	248	34448
[]	uncharacterized protein LOC18099635	1.0	0.999999999935218	0	1	248	34449
[]	MADS-box protein CMB1-like	1.0	0.999999999935218	0	1	248	34449
[]	hypothetical protein POPTR_001G216800	1.0	0.999999999935218	0	1	248	34449
[]	cytochrome P450 82C4	1.0	0.999999999935218	0	1	248	34449
[]	ABC transporter G family member 28-like	1.0	0.999999999895225	0	2	248	34448
[]	ribosomal protein S19 (chloroplast)	1.0	1.00000000005054	0	4	248	34446
[]	UDP-N-acetylglucosamine transferase subunit ALG14 isoform X2	1.0	0.999999999935218	0	1	248	34449
[]	hypothetical protein POPTR_010G086400	1.0	0.999999999935218	0	1	248	34449
[]	protein MIS12 homolog	1.0	0.999999999935218	0	1	248	34449
[]	uncharacterized protein LOC7479675	1.0	0.999999999935218	0	1	248	34449
[]	bifunctional 3-dehydroquinate dehydratase/shikimate dehydrogenase, chloroplastic-like	1.0	1.0000000000094642	0	3	248	34447
[]	PHD finger protein ALFIN-LIKE 1-like	1.0	0.999999999895225	0	2	248	34448
[]	vesicle-associated membrane protein 724	1.0	0.999999999935218	0	1	248	34449
[]	uncharacterized protein LOC7485509 isoform X1	1.0	0.999999999935218	0	1	248	34449
[]	vesicle-associated membrane protein 722	1.0	0.999999999935218	0	1	248	34449
[]	vesicle-associated membrane protein 727	1.0	0.999999999895225	0	2	248	34448
[]	uncharacterized protein LOC18099630	1.0	0.999999999935218	0	1	248	34449
[]	LEAF RUST 10 DISEASE-RESISTANCE LOCUS RECEPTOR-LIKE PROTEIN KINASE-like 1.3 isoform X2	1.0	0.999999999895225	0	2	248	34448
[]	probable sugar phosphate/phosphate translocator At5g25400	1.0	0.999999999895225	0	2	248	34448
[]	LEAF RUST 10 DISEASE-RESISTANCE LOCUS RECEPTOR-LIKE PROTEIN KINASE-like 1.3 isoform X1	1.0	0.99999999992532	0	5	248	34445
[]	uncharacterized protein LOC7478902 isoform X2	1.0	0.999999999935218	0	1	248	34449
[]	protein TIC 22, chloroplastic	1.0	0.999999999895225	0	2	248	34448
[]	transcription factor IIIB 60 kDa subunit isoform X1	1.0	0.999999999895225	0	2	248	34448
[]	hypothetical protein POPTR_017G045000	1.0	0.999999999935218	0	1	248	34449
[]	pentatricopeptide repeat-containing protein At4g02820, mitochondrial	1.0	0.999999999935218	0	1	248	34449
[]	tubby-like protein 8	1.0	0.999999999895225	0	2	248	34448
[]	GUB_WAK_bind domain-containing protein	1.0	0.999999999935218	0	1	248	34449
[]	uncharacterized protein LOC18094324 isoform X1	1.0	0.999999999935218	0	1	248	34449
[]	uncharacterized protein LOC7478332	1.0	0.999999999935218	0	1	248	34449
[]	uncharacterized protein LOC18094324 isoform X4	1.0	0.999999999935218	0	1	248	34449
[]	E3 ubiquitin-protein ligase SIRP1-like	1.0	0.999999999895225	0	2	248	34448
[]	hypothetical protein POPTR_002G208200	1.0	0.999999999935218	0	1	248	34449
[]	phospholipase SGR2-like isoform X1	1.0	0.999999999895225	0	2	248	34448
[]	SAP-like protein BP-73	1.0	0.999999999895225	0	2	248	34448
[]	protein PLANT CADMIUM RESISTANCE 2-like	1.0	0.9999999999930864	0	6	248	34444
[]	Mannan endo-1,4-beta-mannosidase 5	1.0	0.999999999935218	0	1	248	34449
[]	P-loop NTPase domain-containing protein LPA1 homolog 1 isoform X1	1.0	0.999999999935218	0	1	248	34449
[]	probable protein phosphatase 2C 4	1.0	1.0000000000094642	0	3	248	34447
[]	pentatricopeptide repeat-containing protein At4g18520, chloroplastic	1.0	0.999999999895225	0	2	248	34448
[]	ATPase 10, plasma membrane-type	1.0	0.999999999935218	0	1	248	34449
[]	red chlorophyll catabolite reductase-like	1.0	0.999999999895225	0	2	248	34448
[]	probable hexokinase-like 2 protein	1.0	0.999999999935218	0	1	248	34449
[]	P-loop NTPase domain-containing protein LPA1 homolog 1	1.0	0.999999999935218	0	1	248	34449
[]	probable protein phosphatase 2C 9	1.0	0.999999999895225	0	2	248	34448
[]	probable protein phosphatase 2C 8	1.0	0.999999999935218	0	1	248	34449
[]	hypothetical protein POPTR_010G216400	1.0	0.999999999935218	0	1	248	34449
[]	FAE1_CUT1_RppA domain-containing protein/ACP_syn_III_C domain-containing protein	1.0	0.999999999935218	0	1	248	34449
[]	probable protein phosphatase 2C 6	1.0	0.999999999895225	0	2	248	34448
[]	ribosomal protein L17-like protein	1.0	0.999999999895225	0	2	248	34448
[]	hypothetical protein D5086_0000103530	1.0	0.999999999935218	0	1	248	34449
[]	putative pentatricopeptide repeat-containing protein At1g02420	1.0	0.999999999935218	0	1	248	34449
[]	gag-pol polyprotein	1.0	1.0000000000094642	0	3	248	34447
[]	probable ribosomal protein S11, mitochondrial	1.0	0.999999999935218	0	1	248	34449
[]	hypothetical protein POPTR_001G444300	1.0	0.999999999935218	0	1	248	34449
[]	SAGA-associated factor 29-like isoform X1	1.0	0.999999999935218	0	1	248	34449
[OVER]	actin-7	1.0	0.028285700893014576	1	3	247	34447
[]	uncharacterized protein D5086_0000235200	1.0	0.999999999935218	0	1	248	34449
[]	early nodulin-93-like	1.0	1.0000000000094642	0	3	248	34447
[]	uncharacterized protein LOC7493982	1.0	0.999999999935218	0	1	248	34449
[]	psbP domain-containing protein 3, chloroplastic	1.0	0.999999999935218	0	1	248	34449
[]	alanine--tRNA ligase, chloroplastic/mitochondrial isoform X1	1.0	0.999999999935218	0	1	248	34449
[OVER]	histidine-containing phosphotransfer protein 1-like	1.0	0.028285700893014576	1	3	247	34447
[]	oxidative stress 3	1.0	0.999999999935218	0	1	248	34449
[]	hypersensitive-induced response protein 4	1.0	0.999999999895225	0	2	248	34448
[]	VQ motif-containing	1.0	0.999999999935218	0	1	248	34449
[]	hypersensitive-induced response protein 1	1.0	0.999999999895225	0	2	248	34448
[]	UBX domain-containing protein 1-like isoform X2	1.0	0.999999999935218	0	1	248	34449
[]	hypersensitive-induced response protein 2	1.0	0.999999999935218	0	1	248	34449
[]	hypothetical protein POPTR_010G062440	1.0	0.999999999935218	0	1	248	34449
[]	hypothetical protein POPTR_012G100900	1.0	0.999999999935218	0	1	248	34449
[]	ATP-dependent (S)-NAD(P)H-hydrate dehydratase isoform X1	1.0	0.999999999935218	0	1	248	34449
[]	homeobox protein ATH1-like	1.0	0.999999999935218	0	1	248	34449
[]	E3 ubiquitin-protein ligase PRT1	1.0	0.999999999935218	0	1	248	34449
[]	uncharacterized protein LOC18108191	1.0	0.999999999935218	0	1	248	34449
[]	DNA repair protein RAD16 isoform X1	1.0	0.999999999935218	0	1	248	34449
[]	F-box protein SKIP16 isoform X1	1.0	0.999999999895225	0	2	248	34448
[]	uncharacterized protein LOC7493979	1.0	0.999999999935218	0	1	248	34449
[]	meiosis-specific protein ASY1 isoform X1	1.0	0.999999999935218	0	1	248	34449
[]	zinc finger protein BRUTUS-like At1g18910	1.0	0.999999999935218	0	1	248	34449
[]	importin-5	1.0	0.999999999895225	0	2	248	34448
[OVER]	chlorophyll a-b binding protein CP29.2, chloroplastic	1.0	0.014243891427497189	1	1	247	34449
[]	hypothetical protein POPTR_018G089150	1.0	0.999999999935218	0	1	248	34449
[]	general transcription factor IIH subunit 2	1.0	0.999999999935218	0	1	248	34449
[]	5'-methylthioadenosine/S-adenosylhomocysteine nucleosidase 2-like	1.0	0.999999999895225	0	2	248	34448
[]	hsp70 nucleotide exchange factor fes1	1.0	0.999999999895225	0	2	248	34448
[]	nucleobase-ascorbate transporter 11	1.0	0.999999999935218	0	1	248	34449
[]	nucleobase-ascorbate transporter 12	1.0	0.999999999895225	0	2	248	34448
[]	putative membrane-bound O-acyltransferase C24H6.01c	1.0	0.999999999935218	0	1	248	34449
[]	nuclear pore complex protein NUP98A-like isoform X2	1.0	0.999999999935218	0	1	248	34449
[]	meiosis-specific protein ASY1	1.0	0.999999999935218	0	1	248	34449
[]	nifU-like protein 4, mitochondrial	1.0	0.999999999895225	0	2	248	34448
[]	uncharacterized protein LOC7474661 isoform X1	1.0	0.999999999935218	0	1	248	34449
[]	putative zinc finger A20 and AN1 domain-containing stress-associated protein 8	1.0	0.999999999935218	0	1	248	34449
[]	hypothetical protein POPTR_006G128550	1.0	0.999999999935218	0	1	248	34449
[]	FGGY carbohydrate kinase domain-containing protein	1.0	0.999999999935218	0	1	248	34449
[]	ATP-dependent 6-phosphofructokinase 3-like	1.0	1.0000000000094642	0	3	248	34447
[]	uncharacterized protein LOC7491328 isoform X1	1.0	0.999999999935218	0	1	248	34449
[]	zinc finger CCCH domain-containing protein 62 isoform X2	1.0	0.999999999935218	0	1	248	34449
[]	hypothetical protein CRG98_044205, partial	1.0	0.999999999935218	0	1	248	34449
[]	probable histone H2B.1	1.0	0.999999999895225	0	2	248	34448
[]	hypothetical protein POPTR_013G152300	1.0	0.999999999935218	0	1	248	34449
[]	pentatricopeptide repeat-containing protein At3g21470	1.0	0.999999999935218	0	1	248	34449
[]	reverse transcriptase	1.0	0.999999999935218	0	1	248	34449
[]	probable root meristem growth factor 8	1.0	0.999999999935218	0	1	248	34449
[]	uncharacterized protein LOC7494891 isoform X1	1.0	0.999999999935218	0	1	248	34449
[]	UDP-glucosyltransferase 88A1	1.0	1.0000000000094642	0	3	248	34447
[]	Glutamyl-tRNA(Gln) amidotransferase subunit A isoform 1	1.0	0.999999999935218	0	1	248	34449
[]	methyl-CpG-binding domain-containing protein 2-like isoform X1	1.0	1.0000000000094642	0	3	248	34447
[]	ubiquitin hydrolase B isoform X1	1.0	0.999999999935218	0	1	248	34449
[]	uncharacterized protein LOC7465119	1.0	0.999999999935218	0	1	248	34449
[]	uncharacterized protein LOC7480730	1.0	0.999999999935218	0	1	248	34449
[]	uncharacterized protein LOC7454463	1.0	0.999999999935218	0	1	248	34449
[]	uncharacterized protein LOC7454464	1.0	0.999999999935218	0	1	248	34449
[]	probable serine/threonine-protein phosphatase 2A regulatory subunit B'' subunit TON2	1.0	0.999999999895225	0	2	248	34448
[]	hypothetical protein POPTR_005G108650	1.0	0.999999999935218	0	1	248	34449
[]	probable histone H2B.3	1.0	1.0000000000094642	0	3	248	34447
[]	BAG family molecular chaperone regulator 5, mitochondrial	1.0	0.999999999935218	0	1	248	34449
[]	deoxycytidylate deaminase	1.0	0.999999999895225	0	2	248	34448
[]	nuclear pore complex protein NUP50A-like	1.0	0.999999999935218	0	1	248	34449
[]	putative F-box protein	1.0	0.999999999935218	0	1	248	34449
[]	hypothetical protein POPTR_008G020550	1.0	0.999999999935218	0	1	248	34449
[]	syntaxin-121-like	1.0	0.999999999935218	0	1	248	34449
[]	STOREKEEPER protein-like	1.0	0.999999999895225	0	2	248	34448
[]	(3S,6E)-nerolidol synthase 1-like	1.0	0.999999999935218	0	1	248	34449
[]	uncharacterized protein LOC7480763	1.0	0.999999999935218	0	1	248	34449
[]	probable E3 ubiquitin-protein ligase LOG2	1.0	1.0000000000094642	0	3	248	34447
[]	PREDICTED: uncharacterized protein LOC105126042 isoform X1	1.0	0.999999999935218	0	1	248	34449
[]	photosystem I reaction center subunit VI, chloroplastic	1.0	0.999999999935218	0	1	248	34449
[]	mechanosensitive ion channel protein 10	1.0	0.999999999935218	0	1	248	34449
[]	NADPH-dependent aldo-keto reductase, chloroplastic-like	1.0	1.0000000000094642	0	3	248	34447
[]	DUF3511 domain protein, putative (DUF3511)	1.0	0.999999999935218	0	1	248	34449
[]	hypothetical protein POPTR_001G180500	1.0	0.999999999935218	0	1	248	34449
[]	arginase 1, mitochondrial	1.0	0.999999999895225	0	2	248	34448
[]	hypothetical protein POPTR_018G136000	1.0	0.999999999935218	0	1	248	34449
[]	endoglucanase 2	1.0	0.999999999895225	0	2	248	34448
[]	uncharacterized protein LOC7477118	1.0	0.999999999935218	0	1	248	34449
[]	SNF1-related protein kinase regulatory subunit gamma-1-like	1.0	0.999999999895225	0	2	248	34448
[]	crossover junction endonuclease MUS81 isoform X1	1.0	0.999999999935218	0	1	248	34449
[]	TPRXL isoform X3	1.0	0.999999999895225	0	2	248	34448
[]	endoglucanase 8	1.0	0.999999999895225	0	2	248	34448
[]	endoglucanase 6	1.0	0.999999999895225	0	2	248	34448
[]	protein LIM3-like	1.0	0.999999999935218	0	1	248	34449
[]	uncharacterized protein LOC7465133	1.0	0.999999999935218	0	1	248	34449
[]	cytochrome c oxidase subunit 6b-2	1.0	0.999999999935218	0	1	248	34449
[]	cactin isoform X1	1.0	0.999999999895225	0	2	248	34448
[]	hypothetical protein POPTR_001G456700	1.0	0.999999999935218	0	1	248	34449
[]	floral homeotic protein APETALA 2-like isoform X1	1.0	0.999999999935218	0	1	248	34449
[]	hypothetical protein POPTR_008G057800	1.0	0.999999999935218	0	1	248	34449
[]	probable polyamine transporter At1g31830	1.0	0.999999999935218	0	1	248	34449
[]	bidirectional sugar transporter NEC1-like	1.0	0.999999999935218	0	1	248	34449
[]	RAB6-interacting golgin	1.0	0.999999999895225	0	2	248	34448
[]	GRIP1-associated protein 1	1.0	0.999999999895225	0	2	248	34448
[]	cytochrome c oxidase subunit 6b-1	1.0	0.999999999935218	0	1	248	34449
[]	DUF707 domain-containing protein	1.0	0.999999999895225	0	2	248	34448
[]	putative beta-glucosidase 41 isoform X1	1.0	0.999999999935218	0	1	248	34449
[]	Putative 5'(3')-deoxyribonucleotidase	1.0	0.999999999935218	0	1	248	34449
[]	pentatricopeptide repeat-containing protein At5g14770, mitochondrial	1.0	0.999999999935218	0	1	248	34449
[]	ras-related protein RABD2a	1.0	0.999999999935218	0	1	248	34449
[]	protein HIGH ARSENIC CONTENT 1, mitochondrial	1.0	0.999999999935218	0	1	248	34449
[]	probable GABA transporter 2	1.0	0.999999999895225	0	2	248	34448
[]	branched-chain amino acid aminotransferase, putative	1.0	0.999999999935218	0	1	248	34449
[]	calmodulin-binding transcription activator 3 isoform X1	1.0	0.999999999895225	0	2	248	34448
[]	Cytochrome c oxidase assembly protein	1.0	0.999999999895225	0	2	248	34448
[]	OTU domain-containing protein At3g57810-like isoform X3	1.0	0.999999999935218	0	1	248	34449
[]	pentatricopeptide repeat-containing protein At1g62260, mitochondrial	1.0	0.999999999935218	0	1	248	34449
[]	2-methyl-6-phytyl-1,4-hydroquinone methyltransferase, chloroplastic-like	1.0	0.999999999895225	0	2	248	34448
[]	transmembrane 9 superfamily member 12-like	1.0	0.999999999935218	0	1	248	34449
[]	protein STRUBBELIG-RECEPTOR FAMILY 3 isoform X1	1.0	1.00000000005054	0	4	248	34446
[]	beta-amylase 7 isoform X1	1.0	0.999999999895225	0	2	248	34448
[]	28S ribosomal S35, mitochondrial	1.0	0.999999999935218	0	1	248	34449
[]	serine/arginine-rich splicing factor SR45a-like isoform X1	1.0	0.999999999935218	0	1	248	34449
[]	zinc finger CCCH domain-containing protein 15 homolog	1.0	0.999999999935218	0	1	248	34449
[]	serine/arginine-rich splicing factor SR45a-like isoform X2	1.0	0.999999999935218	0	1	248	34449
[]	hypothetical protein POPTR_001G094000	1.0	0.999999999935218	0	1	248	34449
[]	auxin response factor 18 isoform X1	1.0	0.999999999895225	0	2	248	34448
[]	palmitoyl-acyl carrier protein thioesterase, chloroplastic	1.0	0.999999999935218	0	1	248	34449
[]	tartrate-resistant acid phosphatase type 5-like	1.0	0.999999999895225	0	2	248	34448
[]	dirigent protein 23-like	1.0	0.999999999935218	0	1	248	34449
[]	probable GTP diphosphokinase CRSH, chloroplastic	1.0	0.999999999935218	0	1	248	34449
[]	hypothetical protein POPTR_013G093450	1.0	0.999999999935218	0	1	248	34449
[]	tRNase Z TRZ2, chloroplastic	1.0	0.999999999935218	0	1	248	34449
[]	putative pentatricopeptide repeat-containing protein At1g53330 isoform X1	1.0	0.999999999935218	0	1	248	34449
[]	ER lumen protein-retaining receptor	1.0	0.999999999895225	0	2	248	34448
[]	glycosyl transferase	1.0	0.999999999935218	0	1	248	34449
[]	hypothetical protein POPTR_019G012900	1.0	0.999999999895225	0	2	248	34448
[]	protein FATTY ACID EXPORT 2, chloroplastic	1.0	0.999999999935218	0	1	248	34449
[]	protein RKD4	1.0	0.999999999895225	0	2	248	34448
[]	protein EARLY-RESPONSIVE TO DEHYDRATION 7, chloroplastic	1.0	0.999999999935218	0	1	248	34449
[]	polyglutamine-binding protein 1-like isoform X1	1.0	0.999999999935218	0	1	248	34449
[]	succinate-semialdehyde dehydrogenase, mitochondrial	1.0	0.999999999935218	0	1	248	34449
[]	non-specific lipid transfer protein GPI-anchored 1	1.0	0.999999999895225	0	2	248	34448
[]	uncharacterized protein LOC7454429	1.0	0.999999999935218	0	1	248	34449
[]	calcium-binding mitochondrial carrier protein SCaMC-1-like isoform X1	1.0	0.999999999935218	0	1	248	34449
[]	uncharacterized protein LOC7454425	1.0	0.999999999935218	0	1	248	34449
[]	cation/H(+) antiporter 19-like	1.0	0.999999999895225	0	2	248	34448
[]	ureide permease 1 isoform X1	1.0	0.999999999935218	0	1	248	34449
[]	THO complex subunit 7A	1.0	0.999999999895225	0	2	248	34448
[]	hypothetical protein POPTR_001G239700	1.0	0.999999999935218	0	1	248	34449
[]	ubiquitin carboxyl-terminal hydrolase 24 isoform X1	1.0	0.999999999935218	0	1	248	34449
[]	tetraspanin-19 isoform X1	1.0	0.999999999935218	0	1	248	34449
[]	COP9 signalosome complex subunit 7-like isoform X2	1.0	0.999999999935218	0	1	248	34449
[]	MLO-like protein 13 isoform X1	1.0	0.999999999935218	0	1	248	34449
[]	1-phosphatidylinositol-3-phosphate 5-kinase FAB1B-like isoform X1	1.0	0.999999999895225	0	2	248	34448
[]	diaminopimelate epimerase, chloroplastic	1.0	0.999999999895225	0	2	248	34448
[]	jmjC domain-containing protein 4 isoform X1	1.0	0.999999999935218	0	1	248	34449
[]	tRNA(His) guanylyltransferase 1-like isoform X1	1.0	0.999999999935218	0	1	248	34449
[]	uncharacterized protein LOC7479730	1.0	0.999999999935218	0	1	248	34449
[]	actin-related protein 5 isoform X1	1.0	0.999999999935218	0	1	248	34449
[]	Erythronate-4-phosphate dehydrogenase family protein isoform 1	1.0	0.999999999935218	0	1	248	34449
[]	casparian strip membrane protein 1-like	1.0	0.999999999935218	0	1	248	34449
[]	programmed cell death 6-interacting protein	1.0	0.999999999935218	0	1	248	34449
[]	ADP-ribosylation factor GTPase-activating protein AGD12	1.0	0.999999999895225	0	2	248	34448
[OVER]	photosystem II stability/assembly factor HCF136, chloroplastic	1.0	0.007147386016652852	1	0	247	34450
[]	uncharacterized protein LOC7478407	1.0	0.999999999935218	0	1	248	34449
[]	serine-threonine kinase receptor-associated protein-like	1.0	0.999999999895225	0	2	248	34448
[]	COP9 signalosome complex subunit 7-like isoform X1	1.0	0.999999999935218	0	1	248	34449
[]	NADH dehydrogenase [ubiquinone] 1 beta subcomplex subunit 10-B-like	1.0	0.999999999895225	0	2	248	34448
[]	uncharacterized protein LOC7455768	1.0	0.999999999935218	0	1	248	34449
[]	uncharacterized protein LOC7471131 isoform X1	1.0	0.999999999935218	0	1	248	34449
[]	L-type lectin-domain containing receptor kinase VIII.2-like	1.0	0.999999999935218	0	1	248	34449
[]	protein SCO1 homolog 1, mitochondrial	1.0	0.999999999935218	0	1	248	34449
[]	2-(3-amino-3-carboxypropyl)histidine synthase subunit 1-like	1.0	0.999999999935218	0	1	248	34449
[]	DNA topoisomerase 2-like isoform X1	1.0	0.999999999895225	0	2	248	34448
[]	uncharacterized protein LOC7477192 isoform X1	1.0	0.999999999935218	0	1	248	34449
[]	ran-binding protein 1 homolog b-like	1.0	0.999999999895225	0	2	248	34448
[]	probable protein phosphatase 2C 5 isoform X1	1.0	0.999999999895225	0	2	248	34448
[]	UDP-URONIC ACID TRANSPORTER 1	1.0	0.999999999895225	0	2	248	34448
[]	E3 ubiquitin-protein ligase RZF1	1.0	0.999999999935218	0	1	248	34449
[]	probable inactive ATP-dependent zinc metalloprotease FTSHI 3, chloroplastic	1.0	0.999999999935218	0	1	248	34449
[]	neurogenic locus notch-like protein	1.0	0.999999999895225	0	2	248	34448
[]	nicotinate phosphoribosyltransferase 2	1.0	0.999999999935218	0	1	248	34449
[]	hypothetical protein POPTR_016G078700	1.0	0.999999999935218	0	1	248	34449
[]	F-box protein SKIP14	1.0	0.999999999895225	0	2	248	34448
[]	uncharacterized protein LOC7454448	1.0	0.999999999935218	0	1	248	34449
[]	glutathione transferase GST 23	1.0	0.999999999895225	0	2	248	34448
[]	protein SCARECROW-like	1.0	1.00000000005054	0	4	248	34446
[]	putative pectin methylesterase	1.0	0.9999999999930864	0	6	248	34444
[]	thylakoid lumenal protein TL20.3, chloroplastic isoform X1	1.0	0.999999999935218	0	1	248	34449
[]	protein ALWAYS EARLY 3 isoform X1	1.0	0.999999999895225	0	2	248	34448
[]	coatomer subunit gamma	1.0	0.999999999935218	0	1	248	34449
[]	calcium-dependent protein kinase 17	1.0	0.999999999895225	0	2	248	34448
[]	MTD1 family protein	1.0	0.999999999895225	0	2	248	34448
[]	calcium-dependent protein kinase 13	1.0	0.999999999895225	0	2	248	34448
[]	sodium channel modifier 1-like	1.0	0.999999999935218	0	1	248	34449
[]	probable glutamate carboxypeptidase AMP1	1.0	0.999999999935218	0	1	248	34449
[]	E3 ubiquitin-protein ligase RHF2A-like isoform X1	1.0	0.999999999935218	0	1	248	34449
[]	senescence-associated carboxylesterase 101	1.0	0.9999999999930864	0	6	248	34444
[]	sphingolipid delta(4)-desaturase DES1-like	1.0	0.999999999935218	0	1	248	34449
[]	plastid division protein CDP1, chloroplastic-like isoform X1	1.0	0.999999999895225	0	2	248	34448
[]	protein LOW PSII ACCUMULATION 3, chloroplastic isoform X1	1.0	0.999999999935218	0	1	248	34449
[]	calcium-dependent protein kinase 20	1.0	0.999999999935218	0	1	248	34449
[]	protein enabled homolog	1.0	0.999999999895225	0	2	248	34448
[]	RNA pseudouridine synthase 4, mitochondrial	1.0	0.999999999935218	0	1	248	34449
[]	Cytidyltransferase-like domain-containing protein	1.0	0.999999999935218	0	1	248	34449
[]	vacuolar protein sorting-associated protein 45 homolog	1.0	0.999999999895225	0	2	248	34448
[]	F-box protein SKIP24	1.0	0.999999999935218	0	1	248	34449
[]	phytosulfokine receptor 1-like	1.0	1.0000000000094642	0	3	248	34447
[]	F-box protein SKIP23	1.0	0.999999999895225	0	2	248	34448
[]	uncharacterized protein LOC18098065	1.0	0.999999999935218	0	1	248	34449
[]	5-amino-6-(5-phospho-D-ribitylamino)uracil phosphatase, chloroplastic-like isoform X1	1.0	0.999999999935218	0	1	248	34449
[]	F-box protein SKIP28	1.0	0.999999999935218	0	1	248	34449
[]	lecithin retinol acyltransferase-like	1.0	0.999999999935218	0	1	248	34449
[]	regulatory protein RecX	1.0	0.999999999935218	0	1	248	34449
[]	uncharacterized protein LOC7490701 isoform X1	1.0	0.999999999935218	0	1	248	34449
[]	ethylene-insensitive protein 2-like	1.0	0.999999999895225	0	2	248	34448
[]	cytochrome P450 98A2	1.0	1.0000000000094642	0	3	248	34447
[]	GPCR-type G protein 1	1.0	0.999999999935218	0	1	248	34449
[]	calcium-dependent protein kinase 28	1.0	0.999999999935218	0	1	248	34449
[]	calcium-dependent protein kinase 29	1.0	0.999999999895225	0	2	248	34448
[]	FA_FANCE domain-containing protein	1.0	0.999999999935218	0	1	248	34449
[]	GATA transcription factor 11-like isoform X1	1.0	0.999999999935218	0	1	248	34449
[]	uncharacterized protein LOC18105074 isoform X1	1.0	0.999999999935218	0	1	248	34449
[]	calcium-dependent protein kinase 24	1.0	0.999999999895225	0	2	248	34448
[]	calcium-dependent protein kinase 26	1.0	0.999999999895225	0	2	248	34448
[]	E3 ubiquitin-protein ligase SIS3-like	1.0	0.999999999895225	0	2	248	34448
[]	exopolyphosphatase PRUNE1-like isoform X1	1.0	0.999999999895225	0	2	248	34448
[]	NAC domain-containing protein 100-like	1.0	0.999999999895225	0	2	248	34448
[]	aquaporin PIP2-7-like	1.0	0.999999999935218	0	1	248	34449
[]	UPF0548 protein At2g17695	1.0	0.999999999935218	0	1	248	34449
[]	leucine aminopeptidase 1-like	1.0	0.999999999895225	0	2	248	34448
[]	cytochrome b561 and DOMON domain-containing protein At3g25290-like	1.0	0.999999999935218	0	1	248	34449
[]	major pollen allergen Bet v 1-D/H-like	1.0	0.999999999895225	0	2	248	34448
[]	probable beta-1,3-galactosyltransferase 3 isoform X1	1.0	0.999999999935218	0	1	248	34449
[]	Endosomal targeting BRO1-like domain-containing protein	1.0	0.999999999935218	0	1	248	34449
[]	pentatricopeptide repeat-containing protein At1g06143	1.0	0.999999999935218	0	1	248	34449
[]	beta-1,3-galactosyltransferase GALT1	1.0	0.999999999895225	0	2	248	34448
[]	Succinate dehydrogenase [ubiquinone] iron-sulfur subunit 2, mitochondrial	1.0	0.999999999935218	0	1	248	34449
[]	V-type proton ATPase subunit G-like	1.0	0.999999999895225	0	2	248	34448
[]	serine/threonine-protein kinase ATG1c-like isoform X1	1.0	0.999999999935218	0	1	248	34449
[]	RING-H2 finger protein ATL3	1.0	0.999999999895225	0	2	248	34448
[]	ADP/ATP carrier protein	1.0	0.999999999935218	0	1	248	34449
[]	hypothetical protein POPTR_009G004700	1.0	0.999999999935218	0	1	248	34449
[]	Outer arm dynein light chain 1 protein, putative isoform 1	1.0	0.999999999935218	0	1	248	34449
[]	phospholipase D beta 1-like	1.0	0.999999999935218	0	1	248	34449
[]	ribosomal protein L32 (mitochondrion)	1.0	0.999999999895225	0	2	248	34448
[]	protein PAM68, chloroplastic	1.0	0.999999999935218	0	1	248	34449
[]	F-box/kelch-repeat protein SKIP4	1.0	0.999999999935218	0	1	248	34449
[]	protein FAR1-RELATED SEQUENCE 3-like	1.0	1.0000000000094642	0	3	248	34447
[]	30S ribosomal protein S13, chloroplastic	1.0	0.999999999935218	0	1	248	34449
[]	F-box/kelch-repeat protein SKIP6	1.0	0.999999999935218	0	1	248	34449
[]	RING-H2 finger protein ATL8	1.0	1.0000000000094642	0	3	248	34447
[]	receptor-like protein kinase HERK 1 isoform X1	1.0	0.999999999895225	0	2	248	34448
[]	DTW domain-containing protein 2	1.0	0.999999999895225	0	2	248	34448
[]	rhodanese-like domain-containing protein 9, chloroplastic	1.0	0.999999999935218	0	1	248	34449
[]	WD-40 repeat-containing protein MSI3	1.0	0.999999999935218	0	1	248	34449
[]	bifunctional protein FolD 1, mitochondrial	1.0	0.999999999935218	0	1	248	34449
[]	MACPF domain-containing protein At4g24290-like	1.0	0.999999999895225	0	2	248	34448
[]	uncharacterized protein LOC7467717	1.0	0.999999999935218	0	1	248	34449
[]	MYB family protein	1.0	1.0000000000094642	0	3	248	34447
[]	probable RNA-binding protein 18 isoform X1	1.0	0.999999999935218	0	1	248	34449
[]	transcription factor BHLH021	1.0	0.999999999895225	0	2	248	34448
[]	O-fucosyltransferase 1 isoform X1	1.0	0.999999999935218	0	1	248	34449
[]	O-fucosyltransferase 1 isoform X2	1.0	0.999999999935218	0	1	248	34449
[]	NAC domain-containing protein 91 isoform X1	1.0	0.999999999895225	0	2	248	34448
[]	actin cytoskeleton-regulatory complex protein PAN1-like	1.0	0.999999999935218	0	1	248	34449
[]	protein kinase PINOID 2	1.0	0.999999999935218	0	1	248	34449
[]	Plastocyanin B, chloroplastic	1.0	0.999999999935218	0	1	248	34449
[]	Pyridoxamine 5'-phosphate oxidase family protein isoform 1	1.0	0.999999999935218	0	1	248	34449
[]	WD-40 repeat-containing protein MSI1	1.0	0.999999999895225	0	2	248	34448
[]	dihydrolipoyllysine-residue acetyltransferase component 2 of pyruvate dehydrogenase complex, mitochondrial-like	1.0	0.999999999935218	0	1	248	34449
[]	pectinesterase inhibitor 3	1.0	0.999999999935218	0	1	248	34449
[]	pectinesterase inhibitor 4	1.0	0.999999999895225	0	2	248	34448
[]	Serine/arginine repetitive matrix protein 2 isoform 2	1.0	0.999999999935218	0	1	248	34449
[]	lysine-specific demethylase JMJ25 isoform X3	1.0	0.999999999935218	0	1	248	34449
[]	fructose-1,6-bisphosphatase, chloroplastic	1.0	0.999999999895225	0	2	248	34448
[]	39S ribosomal protein L47, mitochondrial	1.0	0.999999999895225	0	2	248	34448
[]	spindle and kinetochore-associated protein 2	1.0	0.999999999935218	0	1	248	34449
[]	E3 ubiquitin-protein ligase RNF185-like	1.0	1.00000000005054	0	4	248	34446
[]	phenylalanine ammonia-lyase	1.0	0.99999999992532	0	5	248	34445
[]	ankyrin repeat domain-containing protein 50-like	1.0	0.999999999935218	0	1	248	34449
[]	light-harvesting complex-like protein 3 isotype 1, chloroplastic	1.0	0.999999999895225	0	2	248	34448
[]	adenine/guanine permease AZG1-like	1.0	0.999999999935218	0	1	248	34449
[]	tRNA dimethylallyltransferase 9	1.0	0.999999999935218	0	1	248	34449
[]	very-long-chain enoyl-CoA reductase	1.0	0.999999999895225	0	2	248	34448
[]	receptor homology region, transmembrane domain- and RING domain-containing protein 2 isoform X2	1.0	0.999999999895225	0	2	248	34448
[]	alanine aminotransferase 2-like	1.0	0.999999999895225	0	2	248	34448
[]	endochitinase PR4-like	1.0	1.00000000005054	0	4	248	34446
[]	U3 small nucleolar RNA-associated protein 18 homolog	1.0	0.999999999935218	0	1	248	34449
[]	glutathione S-transferase L3-like isoform X1	1.0	0.999999999895225	0	2	248	34448
[]	lysine-specific demethylase JMJ25 isoform X2	1.0	0.999999999935218	0	1	248	34449
[]	lysine-specific demethylase JMJ25 isoform X1	1.0	0.999999999935218	0	1	248	34449
[]	non-specific lipid transfer protein	1.0	0.999999999935218	0	1	248	34449
[]	protein RICE SALT SENSITIVE 3-like	1.0	0.999999999935218	0	1	248	34449
[]	TBC1 domain family member 17-like isoform X1	1.0	0.999999999895225	0	2	248	34448
[]	ras-related protein RABC1-like	1.0	0.999999999895225	0	2	248	34448
[]	DNA mismatch repair protein	1.0	0.999999999935218	0	1	248	34449
[]	aspartyl protease family protein 1 isoform X2	1.0	0.999999999935218	0	1	248	34449
[]	plant-specific TFIIB-related protein 1	1.0	0.999999999935218	0	1	248	34449
[]	tRNA dimethylallyltransferase 2	1.0	0.999999999935218	0	1	248	34449
[]	pentatricopeptide repeat-containing protein At4g04790, mitochondrial-like	1.0	0.999999999935218	0	1	248	34449
[]	50S ribosomal protein L12, chloroplastic-like	1.0	0.999999999935218	0	1	248	34449
[]	ankyrin repeat and SOCS box protein 13	1.0	0.999999999895225	0	2	248	34448
[]	homeobox-leucine zipper protein ROC8-like	1.0	0.999999999935218	0	1	248	34449
[]	receptor protein kinase CLAVATA1	1.0	0.999999999895225	0	2	248	34448
[]	gamma-tubulin complex component 5 isoform X1	1.0	0.999999999935218	0	1	248	34449
[]	probable metal-nicotianamine transporter YSL6	1.0	0.999999999935218	0	1	248	34449
[]	probable metal-nicotianamine transporter YSL7	1.0	1.000000000045962	0	9	248	34441
[]	delta-1-pyrroline-5-carboxylate synthase	1.0	0.999999999935218	0	1	248	34449
[]	hypothetical protein POPTR_018G043800	1.0	0.999999999935218	0	1	248	34449
[]	pentatricopeptide repeat-containing protein At1g56690, mitochondrial	1.0	0.999999999895225	0	2	248	34448
[]	phosphatidylinositol 3-kinase, root isoform	1.0	0.999999999935218	0	1	248	34449
[]	cullin-1-like	1.0	0.99999999992532	0	5	248	34445
[]	protein ACTIVITY OF BC1 COMPLEX KINASE 3, chloroplastic	1.0	0.999999999935218	0	1	248	34449
[]	F-box protein At5g49610-like	1.0	1.00000000005054	0	4	248	34446
[]	NADH dehydrogenase [ubiquinone] flavoprotein 2, mitochondrial	1.0	0.999999999895225	0	2	248	34448
[]	phosphatidylinositol transfer protein 3	1.0	1.0000000000094642	0	3	248	34447
[]	zinc finger CCCH domain-containing protein 2	1.0	0.999999999935218	0	1	248	34449
[]	zinc finger CCCH domain-containing protein 3	1.0	1.0000000000094642	0	3	248	34447
[]	zinc finger CCCH domain-containing protein 5	1.0	0.999999999935218	0	1	248	34449
[]	phosphatidylinositol 3,4,5-trisphosphate 3-phosphatase and protein-tyrosine-phosphatase PTEN1	1.0	0.999999999935218	0	1	248	34449
[]	zinc finger CCCH domain-containing protein 1	1.0	0.999999999935218	0	1	248	34449
[]	F-box protein At5g52880	1.0	0.999999999935218	0	1	248	34449
[]	probable DNA-directed RNA polymerase I subunit RPA43 isoform X1	1.0	0.999999999935218	0	1	248	34449
[]	probable DNA-directed RNA polymerase I subunit RPA43 isoform X2	1.0	0.999999999895225	0	2	248	34448
[]	zinc finger CCCH domain-containing protein 6	1.0	1.0000000000094642	0	3	248	34447
[]	hypothetical protein POPTR_006G272000	1.0	0.999999999935218	0	1	248	34449
[]	elongation factor Tu, mitochondrial	1.0	0.999999999895225	0	2	248	34448
[]	DUF565 domain-containing	1.0	0.999999999935218	0	1	248	34449
[]	hypothetical protein POPTR_003G120550	1.0	0.999999999935218	0	1	248	34449
[]	pentatricopeptide repeat-containing protein At1g80550, mitochondrial	1.0	0.999999999935218	0	1	248	34449
[]	hypothetical protein POPTR_T181300	1.0	0.999999999935218	0	1	248	34449
[]	U-box domain-containing protein 19-like	1.0	0.999999999895225	0	2	248	34448
[]	hypothetical protein POPTR_004G224600	1.0	0.999999999935218	0	1	248	34449
[]	gamma aminobutyrate transaminase 3, chloroplastic	1.0	0.999999999935218	0	1	248	34449
[]	exosome component 10 isoform X2	1.0	0.999999999935218	0	1	248	34449
[]	Mediator of RNA polymerase II transcription subunit 18, putative	1.0	0.999999999895225	0	2	248	34448
[]	pentatricopeptide repeat-containing protein At3g46790, chloroplastic	1.0	0.999999999935218	0	1	248	34449
[]	anti-muellerian hormone type-2 receptor	1.0	0.999999999935218	0	1	248	34449
[]	protein HEADING DATE 3A	1.0	1.0000000000094642	0	3	248	34447
[]	calcium-dependent protein kinase 10	1.0	0.999999999895225	0	2	248	34448
[]	cell division protein FtsZ homolog 2-2, chloroplastic	1.0	0.999999999935218	0	1	248	34449
[]	probable carboxylesterase 12	1.0	0.9999999999108056	0	7	248	34443
[]	calcium-dependent protein kinase 11	1.0	0.999999999935218	0	1	248	34449
[]	protein MULTIPOLAR SPINDLE 1	1.0	0.999999999935218	0	1	248	34449
[]	uncharacterized protein LOC114730946	1.0	0.999999999935218	0	1	248	34449
[]	outer envelope protein 64, mitochondrial	1.0	0.999999999935218	0	1	248	34449
[]	pentatricopeptide repeat-containing protein At1g80880, mitochondrial	1.0	0.999999999935218	0	1	248	34449
[]	alpha-(1,4)-fucosyltransferase	1.0	0.999999999895225	0	2	248	34448
[]	secretory carrier-associated membrane protein 1	1.0	0.999999999895225	0	2	248	34448
[]	probable carboxylesterase 18	1.0	1.00000000005054	0	4	248	34446
[]	hypothetical protein POPTR_013G007500	1.0	0.999999999935218	0	1	248	34449
[]	probable carboxylesterase 17	1.0	0.9999999999930864	0	6	248	34444
[]	probable carboxylesterase 16	1.0	1.0000000000094642	0	3	248	34447
[]	probable carboxylesterase 15	1.0	0.9999999999108056	0	7	248	34443
[]	secretory carrier-associated membrane protein 4	1.0	0.999999999895225	0	2	248	34448
[OVER]	disease resistance protein RPS2	1.0	0.007147386016652852	1	0	247	34450
[]	proteinaceous RNase P 1, chloroplastic/mitochondrial-like isoform X1	1.0	0.999999999935218	0	1	248	34449
[]	pentatricopeptide repeat-containing protein At4g21705, mitochondrial	1.0	0.999999999935218	0	1	248	34449
[]	regulation of nuclear pre-mRNA domain-containing protein 1B-like	1.0	0.999999999935218	0	1	248	34449
[]	hypothetical protein POPTR_015G129650	1.0	0.999999999935218	0	1	248	34449
[]	non-specific lipid-transfer protein-like protein	1.0	0.999999999935218	0	1	248	34449
[]	nuclear intron maturase 2, mitochondrial	1.0	0.999999999895225	0	2	248	34448
[]	pentatricopeptide repeat-containing protein At4g08210	1.0	0.999999999935218	0	1	248	34449
[]	probable cadmium/zinc-transporting ATPase HMA1, chloroplastic	1.0	0.999999999935218	0	1	248	34449
[]	uncharacterized protein LOC18106261 isoform X1	1.0	0.999999999935218	0	1	248	34449
[]	cell polarity protein mor2 isoform X1	1.0	0.999999999935218	0	1	248	34449
[]	protein LOW PSII ACCUMULATION 3, chloroplastic	1.0	0.999999999895225	0	2	248	34448
[]	wall-associated receptor kinase-like protein 5 isoform X1	1.0	0.999999999935218	0	1	248	34449
[]	ATP-dependent helicase/deoxyribonuclease subunit B	1.0	0.999999999935218	0	1	248	34449
[]	RNA pseudouridine synthase 5 isoform X1	1.0	0.999999999935218	0	1	248	34449
[]	aquaporin PIP1-3	1.0	0.999999999935218	0	1	248	34449
[]	PREDICTED: uncharacterized protein LOC105115780 isoform X1	1.0	0.999999999935218	0	1	248	34449
[]	Arsenical pump ATPase, ArsA/GET3 protein	1.0	0.999999999935218	0	1	248	34449
[]	zinc finger CCCH domain-containing protein 20-like	1.0	0.999999999935218	0	1	248	34449
[]	F-box/kelch-repeat protein isoform B	1.0	0.999999999935218	0	1	248	34449
[]	rho GTPase-activating protein gacF-like	1.0	0.999999999935218	0	1	248	34449
[]	mitochondrial fission protein ELM1 isoform X1	1.0	0.999999999935218	0	1	248	34449
[]	uncharacterized protein LOC7485266 isoform X1	1.0	0.999999999935218	0	1	248	34449
[]	alpha-aminoadipic semialdehyde synthase-like isoform X1	1.0	0.999999999935218	0	1	248	34449
[]	phosphatidylinositol/phosphatidylcholine transfer protein SFH9-like	1.0	0.999999999895225	0	2	248	34448
[]	transcription factor bHLH93-like	1.0	0.999999999935218	0	1	248	34449
[]	B3 domain-containing protein At5g42700	1.0	0.999999999895225	0	2	248	34448
[]	rhodanese-like domain-containing protein 4, chloroplastic	1.0	0.999999999895225	0	2	248	34448
[]	pentatricopeptide repeat-containing protein At3g04750, mitochondrial	1.0	1.0000000000094642	0	3	248	34447
[]	hypothetical protein POPTR_004G213900	1.0	0.999999999935218	0	1	248	34449
[]	LOB domain-containing protein 16-like	1.0	0.999999999935218	0	1	248	34449
[]	chromosome transmission fidelity protein 18 homolog	1.0	0.999999999935218	0	1	248	34449
[]	Transmembrane Fragile-X-F-associated protein	1.0	0.999999999935218	0	1	248	34449
[]	psbP domain-containing protein 7, chloroplastic	1.0	0.999999999935218	0	1	248	34449
[]	2-hydroxyacyl-CoA lyase	1.0	0.999999999935218	0	1	248	34449
[]	mRNA-capping enzyme isoform X1	1.0	0.999999999895225	0	2	248	34448
[]	E3 SUMO-protein ligase MMS21	1.0	0.999999999935218	0	1	248	34449
[]	ATP synthase CF1 epsilon subunit (chloroplast)	1.0	0.999999999935218	0	1	248	34449
[]	protein ESKIMO 1	1.0	1.00000000005054	0	4	248	34446
[]	putative ubiquitin-conjugating enzyme E2 24-like	1.0	0.999999999935218	0	1	248	34449
[]	DNA (cytosine-5)-methyltransferase CMT2 isoform X1	1.0	0.999999999935218	0	1	248	34449
[]	AAA-ATPase At3g50940 isoform X1	1.0	0.999999999895225	0	2	248	34448
[]	protein argonaute 5-like	1.0	0.999999999895225	0	2	248	34448
[]	hypothetical protein DKX38_014384	1.0	0.999999999895225	0	2	248	34448
[]	CLTH domain-containing protein	1.0	0.999999999935218	0	1	248	34449
[]	hypothetical protein POPTR_005G050800	1.0	0.999999999935218	0	1	248	34449
[]	serine/threonine-protein kinase STY17-like isoform X1	1.0	0.999999999935218	0	1	248	34449
[]	L-2-aminoadipate reductase	1.0	0.999999999935218	0	1	248	34449
[]	BTB/POZ domain-containing protein At1g55760	1.0	0.999999999935218	0	1	248	34449
[]	uncharacterized protein LOC7484006 isoform X1	1.0	0.999999999935218	0	1	248	34449
[]	protein ACCELERATED CELL DEATH 6-like	1.0	0.999999999935218	0	1	248	34449
[]	serine/threonine-protein kinase SRK2I	1.0	0.999999999935218	0	1	248	34449
[]	RNA polymerase I-specific transcription initiation factor rrn3	1.0	0.999999999935218	0	1	248	34449
[]	serine/threonine-protein kinase SRK2E	1.0	0.999999999935218	0	1	248	34449
[]	At4g21310p-like protein	1.0	0.999999999935218	0	1	248	34449
[]	Prefoldin chaperone subunit family protein	1.0	0.999999999935218	0	1	248	34449
[]	uncharacterized protein LOC18109351	1.0	0.999999999935218	0	1	248	34449
[]	hypothetical protein POPTR_017G047932	1.0	0.999999999935218	0	1	248	34449
[]	Spore coat assembly protein like	1.0	0.999999999895225	0	2	248	34448
[]	precursor of	1.0	0.999999999935218	0	1	248	34449
[]	30S ribosomal protein S6 alpha, chloroplastic	1.0	0.999999999935218	0	1	248	34449
[]	uncharacterized protein LOC112326893 isoform X2	1.0	0.999999999935218	0	1	248	34449
[]	radical S-adenosyl methionine domain-containing protein 1, mitochondrial	1.0	0.999999999935218	0	1	248	34449
[]	probable plastid-lipid-associated protein 4, chloroplastic isoform X1	1.0	0.999999999935218	0	1	248	34449
[]	protein C2-DOMAIN ABA-RELATED 1-like	1.0	0.999999999935218	0	1	248	34449
[]	uncharacterized protein LOC18109355	1.0	0.999999999935218	0	1	248	34449
[]	uncharacterized protein LOC18101480 isoform X4	1.0	0.999999999935218	0	1	248	34449
[]	uncharacterized protein LOC18109352	1.0	0.999999999935218	0	1	248	34449
[]	exportin-T-like isoform X1	1.0	0.999999999895225	0	2	248	34448
[]	serine/threonine-protein kinase SRK2A	1.0	1.00000000005054	0	4	248	34446
[]	bifunctional dihydrofolate reductase-thymidylate synthase 1 isoform X1	1.0	0.999999999935218	0	1	248	34449
[]	cryptochrome-1 isoform X1	1.0	1.0000000000094642	0	3	248	34447
[]	F-box/kelch-repeat protein At2g44130-like	1.0	0.999999999895225	0	2	248	34448
[]	uncharacterized protein LOC18111122 isoform X2	1.0	0.999999999935218	0	1	248	34449
[]	hydroxymethylglutaryl-CoA lyase, mitochondrial-like	1.0	0.999999999935218	0	1	248	34449
[]	gibberellin 20 oxidase 1-D	1.0	0.999999999935218	0	1	248	34449
[]	E3 ubiquitin-protein ligase KEG-like	1.0	0.999999999895225	0	2	248	34448
[]	protein DELETION OF SUV3 SUPPRESSOR 1(I)-like	1.0	0.999999999935218	0	1	248	34449
[]	hypothetical protein POPTR_017G019000	1.0	0.999999999935218	0	1	248	34449
[]	cell division protein FtsY homolog, chloroplastic	1.0	0.999999999935218	0	1	248	34449
[]	fatty acyl-CoA reductase 2-like	1.0	0.999999999935218	0	1	248	34449
[]	very-long-chain (3R)-3-hydroxyacyl-CoA dehydratase 2	1.0	0.999999999935218	0	1	248	34449
[]	serine/threonine-protein kinase minibrain-like	1.0	0.999999999895225	0	2	248	34448
[]	orf142 (mitochondrion)	1.0	0.999999999935218	0	1	248	34449
[]	pre-mRNA-processing protein 40A-like	1.0	0.999999999935218	0	1	248	34449
[]	uncharacterized protein LOC7454968 isoform X1	1.0	0.999999999935218	0	1	248	34449
[]	uncharacterized protein LOC7490182	1.0	0.999999999935218	0	1	248	34449
[]	probable 3-hydroxyisobutyrate dehydrogenase-like 1, mitochondrial	1.0	0.999999999935218	0	1	248	34449
[]	NADH dehydrogenase subunit 4a (mitochondrion)	1.0	0.999999999935218	0	1	248	34449
[]	nuclear pore complex protein NUP62	1.0	0.999999999935218	0	1	248	34449
[]	AP-3 complex subunit sigma	1.0	0.999999999895225	0	2	248	34448
[]	transcription factor bHLH162 isoform X1	1.0	0.999999999935218	0	1	248	34449
[]	transcription factor bHLH162 isoform X2	1.0	0.999999999935218	0	1	248	34449
[]	ribonuclease III domain-containing protein RNC1, chloroplastic	1.0	0.999999999935218	0	1	248	34449
[]	hypothetical protein POPTR_016G136300	1.0	0.999999999935218	0	1	248	34449
[]	AP2/ERF and B3 domain-containing transcription factor At1g50680-like isoform X2	1.0	0.999999999895225	0	2	248	34448
[]	LIMR family protein At5g01460	1.0	0.999999999895225	0	2	248	34448
[]	pollen-specific protein SF21-like isoform X2	1.0	0.999999999935218	0	1	248	34449
[]	pollen-specific protein SF21-like isoform X1	1.0	0.999999999895225	0	2	248	34448
[]	galactoside 2-alpha-L-fucosyltransferase-like	1.0	1.00000000005054	0	4	248	34446
[]	protein TPX2	1.0	1.00000000005054	0	4	248	34446
[]	epsin N-terminal-likey domain-containing family protein	1.0	0.999999999935218	0	1	248	34449
[]	BTB/POZ domain-containing protein NPY5-like	1.0	0.999999999935218	0	1	248	34449
[]	nuclear pore complex protein NUP58	1.0	0.999999999935218	0	1	248	34449
[]	BTB/POZ domain and ankyrin repeat-containing protein NPR2	1.0	0.999999999895225	0	2	248	34448
[]	hypothetical protein POPTR_010G098350	1.0	0.999999999935218	0	1	248	34449
[]	CCAAT/enhancer-binding protein zeta	1.0	0.999999999935218	0	1	248	34449
[]	BTB/POZ domain and ankyrin repeat-containing protein NPR1	1.0	0.999999999935218	0	1	248	34449
[]	uncharacterized protein LOC7457902 isoform X1	1.0	0.999999999935218	0	1	248	34449
[]	hypothetical protein POPTR_014G125800	1.0	0.999999999935218	0	1	248	34449
[]	hypothetical protein POPTR_007G119100	1.0	0.999999999935218	0	1	248	34449
[]	peptidyl-prolyl cis-trans isomerase CYP28, chloroplastic	1.0	0.999999999935218	0	1	248	34449
[]	nuclear pore complex protein NUP54	1.0	0.999999999895225	0	2	248	34448
[]	fusion protein	1.0	0.999999999935218	0	1	248	34449
[]	hypothetical protein POPTR_010G036000	1.0	0.999999999935218	0	1	248	34449
[]	diacylglycerol kinase theta	1.0	0.999999999895225	0	2	248	34448
[]	hypothetical protein POPTR_004G200600	1.0	0.999999999935218	0	1	248	34449
[]	helicase SEN1 isoform X6	1.0	0.999999999935218	0	1	248	34449
[]	hypothetical protein POPTR_019G120400, partial	1.0	0.999999999935218	0	1	248	34449
[]	hypothetical protein POPTR_016G124300	1.0	0.999999999935218	0	1	248	34449
[]	50S ribosomal protein HLP, mitochondrial	1.0	0.999999999935218	0	1	248	34449
[]	HTH-type transcriptional regulator SgrR like	1.0	0.999999999935218	0	1	248	34449
[]	nuclear intron maturase 1, mitochondrial	1.0	0.999999999935218	0	1	248	34449
[]	uncharacterized protein LOC18098009	1.0	0.999999999935218	0	1	248	34449
[]	chaperone protein ClpB1	1.0	0.999999999895225	0	2	248	34448
[]	protein LOW PSII ACCUMULATION 2, chloroplastic	1.0	0.999999999895225	0	2	248	34448
[]	MAR-binding filament-like protein 1-1	1.0	0.999999999935218	0	1	248	34449
[]	Nuclear transport factor 2 (NTF2) family protein	1.0	0.999999999935218	0	1	248	34449
[]	hypothetical protein POPTR_015G140032	1.0	0.999999999935218	0	1	248	34449
[]	nuclear pore complex protein NUP43	1.0	0.999999999935218	0	1	248	34449
[]	multiple organellar RNA editing factor 1, mitochondrial isoform X1	1.0	0.999999999935218	0	1	248	34449
[]	hypothetical protein POPTR_002G259500	1.0	0.999999999935218	0	1	248	34449
[]	proliferating cell nuclear antigen-like	1.0	0.999999999935218	0	1	248	34449
[]	regulatory protein NPR5-like	1.0	0.999999999895225	0	2	248	34448
[]	multiple organellar RNA editing factor 1, mitochondrial isoform X4	1.0	0.999999999935218	0	1	248	34449
[]	c-Myc-binding protein homolog	1.0	0.999999999935218	0	1	248	34449
[]	aberrant root formation protein 4	1.0	0.999999999935218	0	1	248	34449
[]	nuclear pore complex protein NUP35	1.0	0.999999999935218	0	1	248	34449
[OVER]	probable serine/threonine-protein kinase At4g35230	1.0	0.04212828394899001	1	5	247	34445
[]	putative pentatricopeptide repeat-containing protein At5g08310, mitochondrial	1.0	0.999999999935218	0	1	248	34449
[]	protein SPA, chloroplastic-like	1.0	0.999999999935218	0	1	248	34449
[]	uncharacterized protein LOC7490194	1.0	0.999999999935218	0	1	248	34449
[]	UDP-glucuronate decarboxylase protein 1	1.0	0.999999999895225	0	2	248	34448
[]	ABC transporter I family member 11, chloroplastic	1.0	0.999999999935218	0	1	248	34449
[]	U-box domain-containing protein 26-like	1.0	0.999999999895225	0	2	248	34448
[]	GRAM domain-containing protein 1A-like isoform X3	1.0	0.999999999935218	0	1	248	34449
[]	BTB/POZ domain-containing protein At3g22104-like	1.0	0.999999999895225	0	2	248	34448
[]	methionine aminopeptidase 1A	1.0	0.999999999935218	0	1	248	34449
[]	non-specific lipid-transfer protein-like protein At5g64080	1.0	1.00000000005054	0	4	248	34446
[]	hypothetical protein POPTR_006G055100	1.0	0.999999999935218	0	1	248	34449
[]	uncharacterized protein LOC7453836 isoform X4	1.0	0.999999999935218	0	1	248	34449
[]	ornithine decarboxylase-like	1.0	0.999999999895225	0	2	248	34448
[]	uncharacterized protein LOC7491478	1.0	0.999999999935218	0	1	248	34449
[]	lipoamide acyltransferase component of branched-chain alpha-keto acid dehydrogenase complex, mitochondrial	1.0	0.999999999895225	0	2	248	34448
[]	uncharacterized protein LOC7491470	1.0	0.999999999935218	0	1	248	34449
[]	BRASSINOSTEROID INSENSITIVE 1-associated receptor kinase 1	1.0	0.999999999935218	0	1	248	34449
[]	THO complex subunit 5B	1.0	0.999999999895225	0	2	248	34448
[]	SOUL heme-binding protein	1.0	0.999999999935218	0	1	248	34449
[]	ATPase family AAA domain-containing protein 1-B	1.0	0.999999999895225	0	2	248	34448
[]	N utilization substance protein B homolog	1.0	0.999999999935218	0	1	248	34449
[]	chaperone protein dnaJ 20, chloroplastic	1.0	0.999999999895225	0	2	248	34448
[]	hypothetical protein POPTR_007G002300	1.0	0.999999999935218	0	1	248	34449
[]	OBP3-responsive gene 4 isoform 1	1.0	0.999999999895225	0	2	248	34448
[]	uncharacterized protein LOC7465184	1.0	0.999999999935218	0	1	248	34449
[]	defensin-like protein 183	1.0	0.999999999935218	0	1	248	34449
[]	defensin-like protein 182	1.0	0.999999999935218	0	1	248	34449
[]	hypothetical protein POPTR_011G044800	1.0	0.999999999895225	0	2	248	34448
[]	hypothetical protein POPTR_016G004500	1.0	0.999999999935218	0	1	248	34449
[]	cyclin-T1-3-like isoform X1	1.0	0.999999999895225	0	2	248	34448
[]	uncharacterized protein LOC7489147	1.0	0.999999999935218	0	1	248	34449
[]	Elongation factor G like	1.0	0.999999999935218	0	1	248	34449
[]	fumarate hydratase 1, mitochondrial	1.0	0.999999999935218	0	1	248	34449
[]	clathrin coat assembly protein AP180	1.0	0.999999999895225	0	2	248	34448
[]	uncharacterized methyltransferase At2g41040, chloroplastic	1.0	0.999999999895225	0	2	248	34448
[]	probable S-adenosylmethionine-dependent methyltransferase At5g38100	1.0	1.00000000005054	0	4	248	34446
[]	uridine kinase-like protein 5	1.0	0.999999999935218	0	1	248	34449
[]	protein NIM1-INTERACTING 3	1.0	0.999999999935218	0	1	248	34449
[]	protein NIM1-INTERACTING 2	1.0	0.999999999895225	0	2	248	34448
[]	probable helicase MAGATAMA 3 isoform X1	1.0	0.999999999935218	0	1	248	34449
[]	probable L-ascorbate peroxidase 6, chloroplastic isoform X1	1.0	0.999999999935218	0	1	248	34449
[]	dof zinc finger protein DOF4.6-like isoform X1	1.0	1.00000000005054	0	4	248	34446
[]	protein NRT1/ PTR FAMILY 1.1-like	1.0	0.999999999895225	0	2	248	34448
[]	uncharacterized protein LOC18108091	1.0	0.999999999935218	0	1	248	34449
[]	titin homolog isoform X1	1.0	0.999999999935218	0	1	248	34449
[]	titin homolog isoform X2	1.0	0.999999999895225	0	2	248	34448
[]	NADH kinase	1.0	0.999999999935218	0	1	248	34449
[]	uncharacterized protein LOC7469809 isoform X1	1.0	0.999999999935218	0	1	248	34449
[]	UDP-glucuronate:xylan alpha-glucuronosyltransferase 2 isoform X1	1.0	0.999999999935218	0	1	248	34449
[]	1-aminocyclopropane-1-carboxylate oxidase	1.0	1.00000000005054	0	4	248	34446
[]	axial regulator YABBY 1-like	1.0	0.999999999895225	0	2	248	34448
[]	PX domain-containing protein EREX	1.0	0.999999999935218	0	1	248	34449
[]	uridine kinase-like protein 3	1.0	0.999999999895225	0	2	248	34448
[]	Retrovirus-related Pol polyprotein from transposon RE2	1.0	0.999999999895225	0	2	248	34448
[]	Retrovirus-related Pol polyprotein from transposon RE1	1.0	0.9999999999930864	0	6	248	34444
[]	dnaJ homolog subfamily B member 13-like	1.0	0.9999999999108056	0	7	248	34443
[]	phosphoglycerate mutase-like protein 1 isoform X2	1.0	0.999999999935218	0	1	248	34449
[]	DUF819 domain-containing protein	1.0	0.999999999935218	0	1	248	34449
[]	phosphoglycerate mutase-like protein 1 isoform X1	1.0	0.999999999935218	0	1	248	34449
[]	laccase-14-like	1.0	0.999999999895225	0	2	248	34448
[]	ABC transporter I family member 10, chloroplastic	1.0	0.999999999935218	0	1	248	34449
[]	uncharacterized protein LOC7491482	1.0	0.999999999935218	0	1	248	34449
[]	WAT1-related protein At3g02690, chloroplastic isoform X1	1.0	0.999999999935218	0	1	248	34449
[]	THO complex subunit 4A	1.0	0.999999999935218	0	1	248	34449
[]	ankyrin repeat-containing protein, putative	1.0	0.999999999895225	0	2	248	34448
[]	dirigent protein 16-like	1.0	0.999999999935218	0	1	248	34449
[]	basic leucine zipper 43-like	1.0	0.9999999999930864	0	6	248	34444
[]	transmembrane protein 230-like	1.0	1.00000000005054	0	4	248	34446
[]	putative phospholipid-transporting ATPase 9	1.0	1.0000000000094642	0	3	248	34447
[]	AT-hook motif nuclear-localized protein 10	1.0	0.999999999895225	0	2	248	34448
[]	hypothetical protein POPTR_011G005200	1.0	0.999999999935218	0	1	248	34449
[]	vinorine synthase-like	1.0	1.0000000000309572	0	19	248	34431
[]	beta-amylase isoform X1	1.0	0.999999999935218	0	1	248	34449
[]	calmodulin binding protein PICBP	1.0	0.999999999895225	0	2	248	34448
[]	phytochrome-associated serine/threonine-protein phosphatase	1.0	0.999999999895225	0	2	248	34448
[]	myosin-G heavy chain isoform X1	1.0	0.999999999935218	0	1	248	34449
[]	Bet v I type allergen	1.0	0.999999999935218	0	1	248	34449
[]	Actin-depolymerizing factor 7	1.0	1.0000000000094642	0	3	248	34447
[]	uncharacterized protein LOC7492760	1.0	0.999999999935218	0	1	248	34449
[]	ankyrin repeat domain-containing protein 17	1.0	0.999999999935218	0	1	248	34449
[]	uncharacterized protein LOC7466475	1.0	0.999999999935218	0	1	248	34449
[]	TATA box-binding protein-associated factor RNA polymerase I subunit B	1.0	0.999999999935218	0	1	248	34449
[]	AT-hook motif nuclear-localized protein 17	1.0	0.999999999895225	0	2	248	34448
[]	VIN3-like protein 2	1.0	0.999999999895225	0	2	248	34448
[]	VIN3-like protein 1	1.0	0.999999999935218	0	1	248	34449
[]	AT-hook motif nuclear-localized protein 16	1.0	0.999999999895225	0	2	248	34448
[]	probable aspartyl aminopeptidase isoform X1	1.0	0.999999999935218	0	1	248	34449
[]	AT-hook motif nuclear-localized protein 15	1.0	0.999999999895225	0	2	248	34448
[]	ribosomal RNA large subunit methyltransferase I-like isoform X2	1.0	0.999999999935218	0	1	248	34449
[]	probable aspartyl aminopeptidase isoform X2	1.0	0.999999999935218	0	1	248	34449
[]	AT-hook motif nuclear-localized protein 14	1.0	0.999999999895225	0	2	248	34448
[]	AT-hook motif nuclear-localized protein 24	1.0	0.999999999895225	0	2	248	34448
[]	F-box protein At5g03970	1.0	0.999999999935218	0	1	248	34449
[]	AT-hook motif nuclear-localized protein 23	1.0	0.999999999895225	0	2	248	34448
[]	AT-hook motif nuclear-localized protein 22	1.0	0.999999999895225	0	2	248	34448
[]	hypothetical protein POPTR_006G166850	1.0	0.99999999992532	0	5	248	34445
[]	AT-hook motif nuclear-localized protein 20	1.0	0.999999999935218	0	1	248	34449
[]	FRIGIDA-like protein 5 isoform X1	1.0	0.999999999935218	0	1	248	34449
[]	glucose-6-phosphate isomerase, cytosolic	1.0	0.999999999895225	0	2	248	34448
[]	protein NRT1/ PTR FAMILY 2.9-like	1.0	0.999999999895225	0	2	248	34448
[]	glutamate receptor 2.5-like	1.0	0.999999999895225	0	2	248	34448
[]	crooked neck-like protein 1	1.0	0.999999999895225	0	2	248	34448
[]	protein-L-isoaspartate O-methyltransferase 1 isoform X1	1.0	0.999999999935218	0	1	248	34449
[]	DUF393 domain-containing protein	1.0	0.999999999935218	0	1	248	34449
[]	defensin-like protein 159	1.0	0.999999999935218	0	1	248	34449
[]	NAC domain-containing protein 100	1.0	0.999999999935218	0	1	248	34449
[]	protein ABCI7, chloroplastic	1.0	0.999999999895225	0	2	248	34448
[]	calcium-transporting ATPase 10, plasma membrane-type-like	1.0	1.0000000000094642	0	3	248	34447
[]	disease resistance-like protein CSA1	1.0	0.999999999935218	0	1	248	34449
[]	mitochondrial acidic protein MAM33	1.0	0.999999999895225	0	2	248	34448
[]	NAC domain-containing protein 104	1.0	1.0000000000094642	0	3	248	34447
[]	hypothetical protein POPTR_005G131000	1.0	0.999999999935218	0	1	248	34449
[]	F-box protein CPR1 isoform X3	1.0	0.999999999935218	0	1	248	34449
[]	NAC domain-containing protein 101	1.0	1.0000000000094642	0	3	248	34447
[]	rRNA methylase, putative	1.0	0.999999999935218	0	1	248	34449
[]	kelch repeat-containing protein At3g27220-like	1.0	0.999999999935218	0	1	248	34449
[]	uncharacterized membrane protein At3g27390	1.0	1.0000000000094642	0	3	248	34447
[]	hypothetical protein D5086_0000019470	1.0	0.999999999935218	0	1	248	34449
[]	7-deoxyloganetin glucosyltransferase-like	1.0	0.999999999940185	0	22	248	34428
[]	AT-hook motif nuclear-localized protein 25	1.0	0.999999999935218	0	1	248	34449
[]	glucan endo-1,3-beta-glucosidase, basic isoform-like	1.0	1.00000000005054	0	4	248	34446
[]	DNA gyrase subunit B, chloroplastic/mitochondrial	1.0	0.999999999935218	0	1	248	34449
[]	eukaryotic translation initiation factor 4E-1	1.0	0.999999999935218	0	1	248	34449
[]	protein FATTY ACID EXPORT 3, chloroplastic	1.0	0.999999999935218	0	1	248	34449
[]	U-box domain-containing protein 33-like	1.0	0.999999999895225	0	2	248	34448
[]	hypothetical protein DKX38_014345	1.0	0.999999999935218	0	1	248	34449
[]	probable inactive serine/threonine-protein kinase scy1 isoform X1	1.0	0.999999999895225	0	2	248	34448
[]	mitochondrial carrier protein CoAc2 isoform X1	1.0	0.999999999935218	0	1	248	34449
[]	probable inactive serine/threonine-protein kinase scy1 isoform X2	1.0	0.999999999935218	0	1	248	34449
[]	probable sphingolipid transporter spinster homolog 2	1.0	0.999999999895225	0	2	248	34448
[]	WD-40 repeat family protein	1.0	0.999999999935218	0	1	248	34449
[]	phosphoglycerate mutase, putative	1.0	0.999999999935218	0	1	248	34449
[]	ATP-dependent zinc metalloprotease FTSH 10, mitochondrial-like	1.0	0.999999999935218	0	1	248	34449
[]	hypothetical protein POPTR_010G061000	1.0	0.999999999935218	0	1	248	34449
[]	protein ESMERALDA 1	1.0	0.999999999935218	0	1	248	34449
[]	homeobox protein knotted-1-like LET12	1.0	0.999999999895225	0	2	248	34448
[]	LOB domain-containing protein 36-like	1.0	0.999999999895225	0	2	248	34448
[]	structural constituent of cell wall, putative	1.0	0.999999999895225	0	2	248	34448
[]	uncharacterized protein LOC7489131	1.0	0.999999999935218	0	1	248	34449
[]	uncharacterized protein LOC7489132	1.0	0.999999999935218	0	1	248	34449
[]	uncharacterized protein LOC7489124	1.0	0.999999999935218	0	1	248	34449
[]	protein LATE FLOWERING-like	1.0	1.0000000000094642	0	3	248	34447
[]	L-type lectin-domain containing receptor kinase IV.1-like	1.0	0.9999999999930864	0	6	248	34444
[]	adenosine kinase 2-like isoform X1	1.0	0.999999999935218	0	1	248	34449
[]	uncharacterized protein LOC7478191 isoform X1	1.0	0.999999999935218	0	1	248	34449
[]	vacuolar-sorting receptor 6	1.0	0.999999999895225	0	2	248	34448
[]	hypothetical protein POPTR_001G060750	1.0	0.999999999935218	0	1	248	34449
[]	prostaglandin reductase-3	1.0	0.999999999935218	0	1	248	34449
[]	vacuolar-sorting receptor 3	1.0	0.999999999895225	0	2	248	34448
[]	salicylate carboxymethyltransferase-like	1.0	0.999999999935218	0	1	248	34449
[]	17.4 kDa class I heat shock protein-like	1.0	0.999999999935218	0	1	248	34449
[]	tetraspanin-15	1.0	0.999999999895225	0	2	248	34448
[]	tetraspanin-19	1.0	0.999999999895225	0	2	248	34448
[]	F-box/kelch-repeat protein At1g55270	1.0	0.999999999895225	0	2	248	34448
[]	disease resistance protein RPM1	1.0	1.00000000005054	0	4	248	34446
[]	Copper-binding periplasmic protein	1.0	0.999999999895225	0	2	248	34448
[]	ceramide kinase-related family protein	1.0	0.999999999895225	0	2	248	34448
[]	hypothetical protein POPTR_004G234150	1.0	0.999999999935218	0	1	248	34449
[]	uncharacterized WD repeat-containing protein C2A9.03 isoform X1	1.0	1.00000000005054	0	4	248	34446
[]	protein PHLOEM PROTEIN 2-LIKE A9	1.0	0.999999999935218	0	1	248	34449
[]	cytochrome b6-f complex iron-sulfur subunit, chloroplastic	1.0	0.999999999895225	0	2	248	34448
[OVER]	late embryogenesis abundant protein 6	1.0	0.02128987698818279	1	2	247	34448
[]	54S ribosomal protein L51, mitochondrial-like	1.0	0.999999999935218	0	1	248	34449
[]	acyl-coenzyme A oxidase 4, peroxisomal	1.0	0.999999999935218	0	1	248	34449
[]	calcineurin-like metallo-phosphoesterase superfamily protein	1.0	0.999999999895225	0	2	248	34448
[]	glutamic acid-rich protein-like isoform X4	1.0	1.00000000005054	0	4	248	34446
[]	polyubiquitin	1.0	0.9999999999108056	0	7	248	34443
[]	zinc transporter ZTP29	1.0	0.999999999895225	0	2	248	34448
[]	uncharacterized protein LOC7454576	1.0	0.999999999935218	0	1	248	34449
[]	polyubiquitin 11	1.0	0.999999999935218	0	1	248	34449
[]	nudix hydrolase 25	1.0	0.999999999895225	0	2	248	34448
[]	RHOMBOID-like protein 10, chloroplastic	1.0	0.999999999935218	0	1	248	34449
[]	PREDICTED: uncharacterized protein LOC107880540	1.0	0.999999999935218	0	1	248	34449
[]	protein NRT1/ PTR FAMILY 8.3-like	1.0	0.999999999895225	0	2	248	34448
[]	plant UBX domain-containing protein 11	1.0	0.999999999935218	0	1	248	34449
[]	LIM domain-containing protein WLIM1-like	1.0	1.00000000005054	0	4	248	34446
[]	hypothetical protein POPTR_016G041301	1.0	0.999999999935218	0	1	248	34449
[]	SUMO-activating enzyme subunit 2-like	1.0	0.999999999895225	0	2	248	34448
[]	pentatricopeptide repeat-containing protein At3g46870	1.0	0.999999999895225	0	2	248	34448
[]	probable polygalacturonase At1g80170	1.0	1.00000000005054	0	4	248	34446
[]	WAT1-related protein At1g68170-like	1.0	0.999999999935218	0	1	248	34449
[]	magnesium protoporphyrin IX methyltransferase, chloroplastic	1.0	0.999999999895225	0	2	248	34448
[]	molybdenum cofactor sulfurase	1.0	0.999999999935218	0	1	248	34449
[]	cytochrome P450 71A1	1.0	0.999999999895225	0	2	248	34448
[]	spermidine hydroxycinnamoyl transferase	1.0	0.999999999895225	0	2	248	34448
[]	WEB family protein At5g16730, chloroplastic	1.0	0.999999999935218	0	1	248	34449
[]	yrdC domain-containing protein, mitochondrial isoform X1	1.0	0.999999999895225	0	2	248	34448
[OVER]	protein BRASSINOSTEROID INSENSITIVE 1	1.0	0.014243891427497189	1	1	247	34449
[]	pentatricopeptide repeat-containing protein DOT4, chloroplastic	1.0	0.999999999935218	0	1	248	34449
[]	Prefoldin subunit alpha like	1.0	0.999999999935218	0	1	248	34449
[]	probable GTP diphosphokinase RSH2, chloroplastic isoform X4	1.0	0.999999999935218	0	1	248	34449
[]	N-terminal acetyltransferase A complex catalytic subunit NAA10-like	1.0	0.999999999935218	0	1	248	34449
[]	plant UBX domain-containing protein 10	1.0	0.999999999935218	0	1	248	34449
[]	pentatricopeptide repeat-containing protein At1g11290, chloroplastic-like	1.0	0.999999999935218	0	1	248	34449
[]	hypothetical protein POPTR_005G096200	1.0	0.999999999935218	0	1	248	34449
[]	kinesin-like protein KIN-7K, chloroplastic isoform X1	1.0	0.999999999895225	0	2	248	34448
[]	protein ACCUMULATION AND REPLICATION OF CHLOROPLASTS 6, chloroplastic	1.0	0.999999999895225	0	2	248	34448
[]	60S acidic ribosomal protein P2B	1.0	0.999999999935218	0	1	248	34449
[]	telomerase Cajal body protein 1	1.0	0.999999999895225	0	2	248	34448
[]	chlorophyll a-b binding protein CP29.3, chloroplastic	1.0	0.999999999935218	0	1	248	34449
[]	Cytochrome c oxidase biogenesis protein Cmc1-like protein	1.0	0.999999999935218	0	1	248	34449
[]	uncharacterized protein LOC7480886	1.0	0.999999999935218	0	1	248	34449
[]	replication protein A 32 kDa subunit A-like	1.0	0.999999999935218	0	1	248	34449
[]	uncharacterized protein LOC7464611 isoform X2	1.0	0.999999999935218	0	1	248	34449
[]	uncharacterized protein LOC7478563	1.0	0.999999999935218	0	1	248	34449
[]	cyclin-T1-4 isoform X1	1.0	0.999999999935218	0	1	248	34449
[]	protein NBR1 homolog isoform X1	1.0	1.0000000000094642	0	3	248	34447
[]	NAD kinase 2, chloroplastic isoform X1	1.0	0.999999999935218	0	1	248	34449
[]	hypothetical protein POPTR_T036400	1.0	0.999999999935218	0	1	248	34449
[]	LOB domain-containing protein 4-like	1.0	1.00000000005054	0	4	248	34446
[]	cytochrome P450 72A15	1.0	0.9999999999108056	0	7	248	34443
[]	caltractin	1.0	0.999999999935218	0	1	248	34449
[]	Homoserine O-acetyltransferase	1.0	0.999999999935218	0	1	248	34449
[]	probable histone H2A.1	1.0	0.999999999895225	0	2	248	34448
[]	lipopolysaccharide core region biosynthetic process	1.0	0.999999999935218	0	1	248	34449
[]	WD repeat-containing protein 26-like	1.0	0.999999999895225	0	2	248	34448
[]	Gb:AAF35421.1, putative	1.0	0.999999999895225	0	2	248	34448
[]	probable histone H2A.3	1.0	0.999999999935218	0	1	248	34449
[]	UDP-rhamnose/UDP-galactose transporter 4	1.0	0.999999999895225	0	2	248	34448
[]	glycosyltransferase, putative	1.0	0.999999999935218	0	1	248	34449
[]	protein EFR3 homolog B isoform X1	1.0	0.999999999935218	0	1	248	34449
[]	protein WVD2-like 7 isoform X1	1.0	0.9999999999108056	0	7	248	34443
[]	acetyl-CoA carboxylase 1-like	1.0	0.999999999895225	0	2	248	34448
[]	ureide permease 1-like isoform X1	1.0	0.999999999935218	0	1	248	34449
[]	calcineurin subunit B isoform X2	1.0	0.999999999935218	0	1	248	34449
[]	NAD-dependent protein deacylase SRT2 isoform X2	1.0	0.999999999935218	0	1	248	34449
[]	dehydration-responsive element-binding protein 2D-like	1.0	0.999999999895225	0	2	248	34448
[]	hypothetical protein POPTR_002G198200	1.0	0.999999999935218	0	1	248	34449
[]	DEAD-box ATP-dependent RNA helicase 57 isoform X1	1.0	0.999999999935218	0	1	248	34449
[]	putative non-specific lipid-transfer protein 14	1.0	0.999999999895225	0	2	248	34448
[]	uncharacterized protein LOC7478558	1.0	0.999999999935218	0	1	248	34449
[]	cytochrome P450 71D11-like	1.0	0.999999999935218	0	1	248	34449
[]	E3 ubiquitin-protein ligase SINAT5-like	1.0	0.999999999895225	0	2	248	34448
[]	high mobility group B protein 10 isoform X1	1.0	0.999999999935218	0	1	248	34449
[]	uncharacterized protein LOC7478559	1.0	0.999999999935218	0	1	248	34449
[]	probable histone H2A.5	1.0	0.999999999895225	0	2	248	34448
[]	UDP-rhamnose/UDP-galactose transporter 2	1.0	0.999999999935218	0	1	248	34449
[]	J domain-containing protein DDB_G0295729	1.0	0.999999999895225	0	2	248	34448
[]	hypothetical protein POPTR_012G052501	1.0	0.999999999935218	0	1	248	34449
[]	vacuolar-sorting receptor 1-like	1.0	1.0000000000094642	0	3	248	34447
[]	cyclin-C1-2	1.0	0.999999999935218	0	1	248	34449
[]	pentatricopeptide repeat-containing protein At3g04760, chloroplastic	1.0	1.0000000000094642	0	3	248	34447
[]	mitogen-activated protein kinase 20	1.0	0.999999999895225	0	2	248	34448
[]	protein of wound-induced	1.0	1.0000000000094642	0	3	248	34447
[]	pantoate--beta-alanine ligase	1.0	0.999999999935218	0	1	248	34449
[]	ferric reduction oxidase 4-like	1.0	0.999999999935218	0	1	248	34449
[]	uncharacterized protein LOC7454532	1.0	0.999999999935218	0	1	248	34449
[]	periodic tryptophan protein 2	1.0	0.999999999935218	0	1	248	34449
[]	haloacid dehalogenase-like hydrolase domain-containing protein Sgpp	1.0	0.99999999992532	0	5	248	34445
[]	mitogen-activated protein kinase 19	1.0	0.999999999895225	0	2	248	34448
[]	hypothetical protein D5086_0000152280	1.0	0.999999999935218	0	1	248	34449
[]	serine decarboxylase	1.0	0.999999999895225	0	2	248	34448
[]	B3 domain-containing transcription factor LEC2	1.0	0.999999999895225	0	2	248	34448
[]	E3 ubiquitin-protein ligase SINAT5-like isoform X2	1.0	0.999999999935218	0	1	248	34449
[]	putative pentatricopeptide repeat-containing protein At5g13230, mitochondrial	1.0	0.999999999895225	0	2	248	34448
[]	ARM repeat superfamily protein, putative isoform 1	1.0	0.999999999935218	0	1	248	34449
[]	EIN3-binding F-box protein 1	1.0	0.999999999895225	0	2	248	34448
[]	lipid phosphate phosphatase epsilon 2, chloroplastic	1.0	0.999999999895225	0	2	248	34448
[]	hypothetical protein POPTR_012G136700	1.0	0.999999999935218	0	1	248	34449
[]	Urb2 domain-containing protein	1.0	0.999999999935218	0	1	248	34449
[]	transmembrane 9 superfamily member 8-like	1.0	0.999999999895225	0	2	248	34448
[]	probable leucine-rich repeat receptor-like protein kinase At1g68400	1.0	0.999999999895225	0	2	248	34448
[]	ribosome biogenesis protein erb1 isoform X2	1.0	0.999999999895225	0	2	248	34448
[]	uncharacterized protein LOC18097083 isoform X2	1.0	0.999999999935218	0	1	248	34449
[]	uncharacterized protein LOC7467857	1.0	0.999999999935218	0	1	248	34449
[]	uncharacterized protein LOC18097083 isoform X5	1.0	0.999999999935218	0	1	248	34449
[]	mitogen-activated protein kinase homolog MMK2 isoform X1	1.0	0.999999999895225	0	2	248	34448
[]	protein STRUBBELIG-RECEPTOR FAMILY 2	1.0	0.999999999935218	0	1	248	34449
[]	scarecrow-like transcription factor PAT1	1.0	0.999999999935218	0	1	248	34449
[]	chaperone protein dnaJ 20, chloroplastic-like	1.0	1.0000000000094642	0	3	248	34447
[]	protein STRUBBELIG-RECEPTOR FAMILY 6	1.0	0.999999999895225	0	2	248	34448
[]	sucrose phosphate synthase	1.0	0.999999999935218	0	1	248	34449
[]	alkane hydroxylase MAH1	1.0	1.0000000000094642	0	3	248	34447
[]	G patch domain-containing protein 8 isoform X1	1.0	0.999999999895225	0	2	248	34448
[]	protein STRUBBELIG-RECEPTOR FAMILY 8	1.0	0.999999999935218	0	1	248	34449
[]	transcription factor ABORTED MICROSPORES isoform X1	1.0	0.999999999935218	0	1	248	34449
[]	thylakoid lumenal 15 kDa protein 1, chloroplastic	1.0	0.999999999895225	0	2	248	34448
[]	trichohyalin-like isoform X4	1.0	0.999999999935218	0	1	248	34449
[OVER]	hydrophobic protein LTI6B	1.0	0.014243891427497189	1	1	247	34449
[]	kunitz trypsin inhibitor TI3	1.0	0.999999999935218	0	1	248	34449
[]	uncharacterized protein LOC7454554	1.0	0.999999999935218	0	1	248	34449
[]	glucan endo-1,3-beta-glucosidase 5 isoform X1	1.0	0.999999999935218	0	1	248	34449
[]	uncharacterized protein LOC7455889	1.0	0.999999999935218	0	1	248	34449
[]	GATA transcription factor 7-like	1.0	0.999999999935218	0	1	248	34449
[]	ras-related protein RABE1c	1.0	0.999999999895225	0	2	248	34448
[]	peptidyl-prolyl cis-trans isomerase FKBP17-1, chloroplastic	1.0	0.999999999935218	0	1	248	34449
[]	apoptosis inhibitor 5-like protein API5	1.0	0.999999999895225	0	2	248	34448
[]	ABC1 family protein	1.0	0.999999999935218	0	1	248	34449
[]	beta-galactosidase 5-like	1.0	0.999999999895225	0	2	248	34448
[]	mediator of RNA polymerase II transcription subunit 36a-like	1.0	0.999999999895225	0	2	248	34448
[]	casein kinase II subunit beta-2 isoform X1	1.0	0.999999999895225	0	2	248	34448
[]	probable protein arginine N-methyltransferase 3	1.0	0.999999999935218	0	1	248	34449
[]	oxidation resistance protein 1	1.0	1.0000000000094642	0	3	248	34447
[]	isoeugenol synthase 1-like	1.0	0.999999999935218	0	1	248	34449
[]	probable protein arginine N-methyltransferase 6	1.0	0.999999999895225	0	2	248	34448
[]	cysteine and histidine-rich domain-containing protein RAR1	1.0	0.999999999935218	0	1	248	34449
[]	uncharacterized protein LOC7454561	1.0	0.999999999935218	0	1	248	34449
[]	citron Rho-interacting kinase	1.0	0.999999999935218	0	1	248	34449
[]	desumoylating isopeptidase 1	1.0	0.999999999935218	0	1	248	34449
[]	glycolipid transfer protein 3 isoform X1	1.0	0.999999999895225	0	2	248	34448
[]	protein NEOXANTHIN-DEFICIENT 1 isoform X1	1.0	0.999999999895225	0	2	248	34448
[]	F-box protein CPR1	1.0	0.9999999999930864	0	6	248	34444
[]	GDSL esterase/lipase 4-like isoform X1	1.0	1.0000000000094642	0	3	248	34447
[]	myosin-8 isoform X1	1.0	0.999999999935218	0	1	248	34449
[]	dihydrolipoyl dehydrogenase 1, mitochondrial	1.0	0.999999999895225	0	2	248	34448
[]	C2H2 family protein	1.0	1.0000000000094642	0	3	248	34447
[]	nucleosome assembly protein 1	1.0	0.9999999999108056	0	7	248	34443
[]	dnaJ protein ERDJ2A-like	1.0	0.999999999935218	0	1	248	34449
[]	protein PYRICULARIA ORYZAE RESISTANCE 21 isoform X3	1.0	1.0000000000094642	0	3	248	34447
[]	BAHD acyltransferase DCR	1.0	0.9999999999108056	0	7	248	34443
[]	protein PYRICULARIA ORYZAE RESISTANCE 21 isoform X1	1.0	1.0000000000094642	0	3	248	34447
[]	putative F-box protein At1g67623	1.0	0.999999999895225	0	2	248	34448
[]	protein PYRICULARIA ORYZAE RESISTANCE 21 isoform X2	1.0	0.999999999935218	0	1	248	34449
[]	protein FANTASTIC FOUR 1-like	1.0	0.9999999999108056	0	7	248	34443
[]	NADH dehydrogenase [ubiquinone] flavoprotein 1, mitochondrial	1.0	0.999999999895225	0	2	248	34448
[]	3-isopropylmalate dehydrogenase 2, chloroplastic	1.0	0.999999999935218	0	1	248	34449
[]	ATP-dependent RNA helicase DEAH11, chloroplastic	1.0	0.999999999895225	0	2	248	34448
[]	RING-H2 finger protein ATL16-like	1.0	1.0000000000094642	0	3	248	34447
[]	Lysine-rich arabinogalactan protein like	1.0	0.999999999895225	0	2	248	34448
[]	Histone deacetylase 18 -like protein	1.0	0.999999999935218	0	1	248	34449
[]	probable cyclic nucleotide-gated ion channel 16	1.0	0.999999999935218	0	1	248	34449
[]	putative leucine-rich repeat receptor-like serine/threonine-protein kinase At2g14440 isoform X1	1.0	0.999999999895225	0	2	248	34448
[]	carbohydrate-responsive element-binding protein	1.0	0.999999999895225	0	2	248	34448
[]	serine-rich family protein	1.0	0.999999999935218	0	1	248	34449
[]	probable cyclic nucleotide-gated ion channel 14	1.0	0.999999999895225	0	2	248	34448
[]	envelope glycoprotein	1.0	0.999999999935218	0	1	248	34449
[]	uncharacterized protein At2g33490	1.0	0.999999999935218	0	1	248	34449
[]	bifunctional 3-dehydroquinate dehydratase/shikimate dehydrogenase, chloroplastic	1.0	0.999999999895225	0	2	248	34448
[]	RNA polymerase II C-terminal domain phosphatase-like 2 isoform X1	1.0	0.999999999895225	0	2	248	34448
[]	inactive protein kinase SELMODRAFT_444075-like isoform X1	1.0	0.999999999895225	0	2	248	34448
[]	hypothetical protein POPTR_015G058750	1.0	0.999999999935218	0	1	248	34449
[truncated: 16,930 more rows]
