# Supplementary material
Source: publisher figshare collection journal article supplement (https://gsajournals.figshare.com/articles/dataset/_/13017866)
Supplement: Supplementary file 1 [file 1]

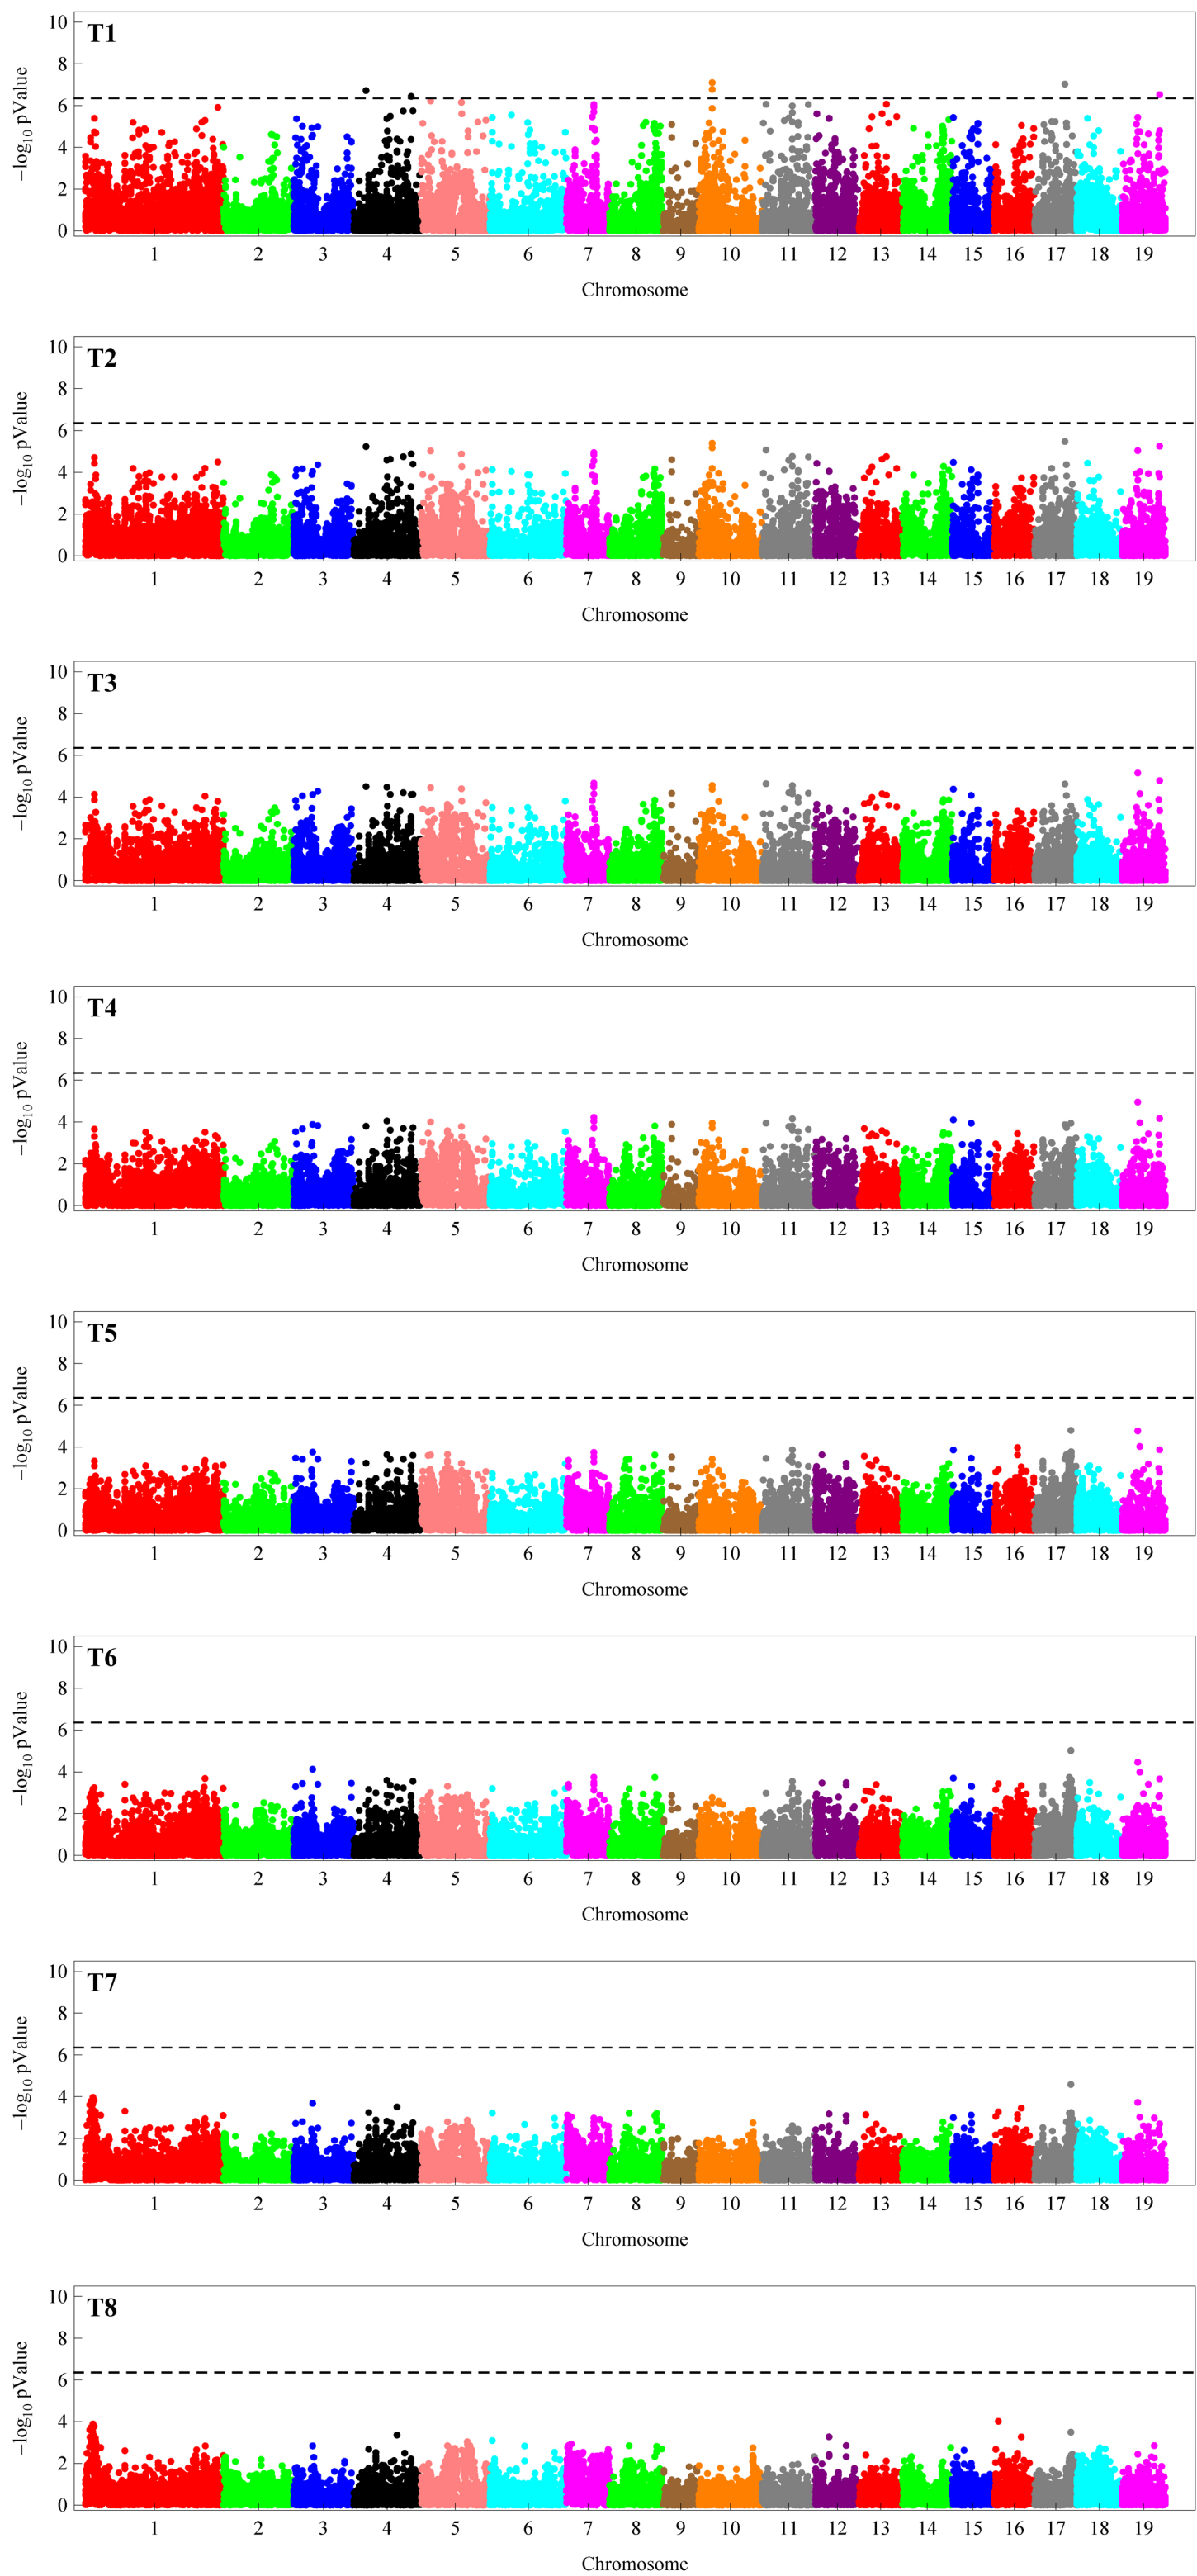

**Figure S1** Manhattan plots of genome-wide association analyses of tree heights at time points T1-T8 separately. The horizontal dashed lines indicate the genome-wide significant threshold of 6.36, a base 10 logarithm of  $p$ -value based on the Bonferroni correction at the 0.01 significant level.

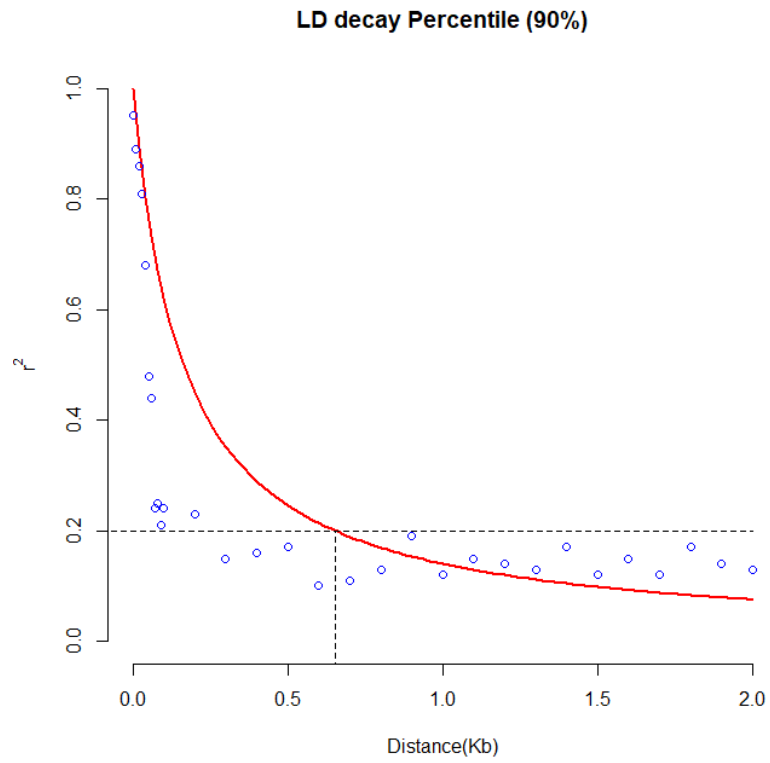

**Figure S2** LD decay in the hybrid F<sub>1</sub> population of *Populus deltoides* and *Populus simonii*. The red curve was fitted on the basis of the equation of Sved (1971) with the 90% percentile of LDs ( $r^2$ ) within a short range of 10-100 bp against the distance of pairwise SNPs. The dashed lines indicate a threshold of  $r^2 = 0.2$  could be used, corresponding to a decay distance of ~650 bp.
