# Supplementary material
Source: publisher figshare collection journal article supplement (https://gsajournals.figshare.com/articles/dataset/_/13017866)
Supplement: Supplementary file 2 [file 1]

**Table S7** Consistency between significant SNPs and QTLs for poplar tree height identified in the current and previous studies.

| Chr | Current Study |               |                              | Liu <i>et al.</i> (2017) |               | Du <i>et al.</i> (2016) |               | Monclus <i>et al.</i> (2012) |               | Description of Candidate Genes                                                                                                                                                                                                                                                                  |
|-----|---------------|---------------|------------------------------|--------------------------|---------------|-------------------------|---------------|------------------------------|---------------|-------------------------------------------------------------------------------------------------------------------------------------------------------------------------------------------------------------------------------------------------------------------------------------------------|
|     | SNP ID        | Position (Mb) | $-\log_{10}(p\text{-value})$ | QTL ID                   | Position (Mb) | QTL ID                  | Position (Mb) | QTL ID                       | Position (Mb) |                                                                                                                                                                                                                                                                                                 |
| 1   | DSC01H1       | 17.02         | 7.42                         |                          |               | QTL <sub>H</sub> -1     | 18.37-21.00   |                              |               | response to gibberellin, auxin, or cytokinin; invloved in photosynthesis; leaf morphogenesis; embryogenesis abundant protein; xylem histogenesis; response to salt or heat stress; water channel activity                                                                                       |
| 1   | DSC01H3       | 43.10         | 8.52                         | Q2D1                     | 31.30         |                         |               | Height1-1                    | 23.12-45.23   | response to brassinosteroid; photosynthesis; late embryogenesis abundant protein-related; maintenance of seed dormancy; probable disease resistance protein                                                                                                                                     |
|     |               |               |                              | Q3D1                     | 35.01         |                         |               |                              |               |                                                                                                                                                                                                                                                                                                 |
| 4   | DSC04H1       | 4.42          | 8.04                         |                          |               |                         |               | Height2-3                    | 4.35-14.30    | response to brassinosteroid or auxin; positive regulation of long-day photoperiodism, flowering; photosynthesis; leaf morphogenesis; embryo development; root hair cell differentiation; response to salt stress, to heat or to water deprivation; cold acclimation                             |
| 5   | DSC05H1       | 0.34          | 8.18                         | QD5                      | 2.24          |                         |               |                              |               | regulation of root development; disease resistance protein RPM1-like; response to salt stress or cold                                                                                                                                                                                           |
| 5   | DSC05H2       | 14.69         | 8.15                         |                          |               |                         |               | Height1-2                    | 7.11-25.8     | auxin-activated signaling pathway; photosynthetic electron transport in photosystem II; shoot system development; seed trichome elongation; negative regulation of response to salt stress; response to heat                                                                                    |
|     | DSC05H3       | 14.81         | 7.12                         |                          |               |                         |               |                              |               |                                                                                                                                                                                                                                                                                                 |
| 6   | DSC06H3       | 13.58         | 7.17                         |                          |               |                         |               | Height2-4                    | 8.45-20.35    | brassinosteroid metabolic process; cytokinin dehydrogenase activity; photosystem II; embryonic shoot morphogenesis; defense response to bacterium; cellular response to salt stress; heat shock factor protein; auxin-responsive protein; photorespiration; late embryogenesis abundant protein |
| 6   | DSC06H4       | 16.20         | 8.38                         |                          |               |                         |               |                              |               |                                                                                                                                                                                                                                                                                                 |
| 7   | DSC07H3       | 10.26         | 6.45                         | QS7                      | 15.28         |                         |               |                              |               | response to gibberellin or brassinosteroid; phototropism; leaf, flower, root and embryo growth or development; response to salt or heat stress, or to water deprivation                                                                                                                         |
| 9   | DSC09H1       | 11.90         | 6.57                         | QD9                      | 8.18          |                         |               |                              |               | cytokinin-activated signaling pathway; phototropism; late embryogenesis abundant protein-related protein; seed dormancy process; involved in seed or root development; response to salt stress or to heat                                                                                       |
|     |               |               |                              | QS9                      | 7.87          |                         |               |                              |               |                                                                                                                                                                                                                                                                                                 |

|    |         |       |      |                     |           |           |            |                                                                                                                                                                                                                                           |
|----|---------|-------|------|---------------------|-----------|-----------|------------|-------------------------------------------------------------------------------------------------------------------------------------------------------------------------------------------------------------------------------------------|
| 10 | DSC10H1 | 4.83  | 9.79 |                     |           | Height2-1 | 3.39-14.17 | auxin metabolic process; cytokinin-activated signaling pathway; photosystem II; glutamine synthetase leaf isozyme; embryo development ending in seed dormancy; heat-inducible transcription repressor                                     |
| 10 | DSC10H2 | 8.08  | 7.53 |                     |           | Height1-3 | 4.87-12.49 | response to brassinosteroid; gibberellin 2-beta-dioxygenase 8-like; 2S sulfur-rich seed storage protein 2-like; 2S sulfur-rich seed storage protein 2-like; disease resistance RPP13-like protein 4; 21.7 kDa class VI heat shock protein |
| 13 | DSC13H1 | 4.73  | 7.62 | QTL <sub>H</sub> -3 | 4.60-5.90 | Height2-6 | 0.57-4.90  | response to gibberellin; response to auxin; photosynthetic NDH subunit of subcomplex B 2; cold-shock protein CS120 isoform X1                                                                                                             |
| 14 | DSC14H1 | 14.72 | 7.27 |                     |           | Height1-5 | 2.70-9.25  | brassinosteroid biosynthetic process; brassinosteroid mediated signaling pathway; embryo development ending in seed dormancy                                                                                                              |
| 16 | DSC16H1 | 9.86  | 6.45 |                     |           | Height2-2 | 0.00-5.02  | response to auxin; photosynthesis; leaf development; embryo development ending in seed dormancy; disease resistance RPP13-like protein 4; water channel activity                                                                          |
